# Supplementary material for: Novel Tetracyclic Azaphenothiazines with the Quinoline Ring as New Anticancer and Antibacterial Derivatives of Chlorpromazine
Source: MDPI journal article supplement (doi:10.3390/ijms25084148), 2024-04-09
Supplement: s1 [file s1]

# Novel Tetracyclic Azaphenothiazines with the Quinoline Ring as New Anticancer and Antibacterial Derivatives of Chlorpromazine

Małgorzata Jeleń <sup>1,\*</sup>, Dagmara Otto-Ślusarczyk <sup>2</sup>, Beata Morak-Młodawska <sup>1</sup> and Marta Struga <sup>2</sup>

<sup>1</sup> Department of Organic Chemistry, The Medical University of Silesia, Jagiellońska 4, 41-200 Sosnowiec, Poland; bmlodawska@sum.edu.pl

<sup>2</sup> Chair and Department of Biochemistry, Medical University of Warsaw, 02-097 Warsaw, Poland

Content:

|                                                                                                                                                  |    |
|--------------------------------------------------------------------------------------------------------------------------------------------------|----|
| 1. NMR spectra and HR MS of 6 <i>H</i> -8-chloroquino[3,2- <i>b</i> ]benzo[1,4]thiazine ( <b>5</b> ).                                            | 2  |
| 2. NMR spectra and HR MS of 8-chloro-6-methylquino[3,2- <i>b</i> ]benzo[1,4]thiazine ( <b>6</b> ).                                               | 4  |
| 3. NMR spectra and HR MS of 2-(8-chloroquino[3,2- <i>b</i> ]benzo[1,4]thiazin-6-yl)- <i>N,N</i> -diethylethan-1-amine ( <b>7</b> ).              | 9  |
| 4. NMR spectra and HR MS of 3-(8-chloroquino[3,2- <i>b</i> ]benzo[1,4]thiazin-6-yl)- <i>N,N</i> -dimethylpropan-1-amine ( <b>8</b> ).            | 11 |
| 5. NMR spectra and HR MS of 8-chloro-6-(2-(pyrrolidin-1-yl)ethyl)-quino[3,2- <i>b</i> ]benzo[1,4]thiazine ( <b>9</b> ).                          | 13 |
| 6. NMR spectra and HR MS of 8-chloro-6-(2-(piperidin-1-yl)ethyl)-quino[3,2- <i>b</i> ]benzo[1,4]thiazine ( <b>10</b> ).                          | 15 |
| 7. NMR spectra and HR MS of 8-chloro-6-(2-(1-methylpiperidin-2-yl)ethyl)-quino[3,2- <i>b</i> ]benzo[1,4]thiazine ( <b>11</b> ).                  | 17 |
| 8. NMR spectra and HR MS of 2-(3-(8-chloroquino[3,2- <i>b</i> ]benzo[1,4]thiazin-6-yl)propyl)isoindoline-1,3-dione ( <b>12</b> ).                | 19 |
| 9. NMR spectra and HR MS of 3-(8-chloroquino[3,2- <i>b</i> ]benzo[1,4]thiazin-6-yl)propan-1-amine ( <b>14</b> ).                                 | 21 |
| 10. NMR spectra and HR MS of <i>N</i> -(3-(8-chloroquino[3,2- <i>b</i> ]benzo[1,4]thiazin-6-yl)propyl)acetamide ( <b>16</b> ).                   | 22 |
| 11. NMR spectra and HR MS of ethyl(3-(8-chloro-quino[3,2- <i>b</i> ]benzo[1,4]thiazin-6-yl)propyl)carbamate ( <b>18</b> ).                       | 24 |
| 12. NMR spectra and HR MS of 1-(3-(8-chloroquino[3,2- <i>b</i> ]benzo[1,4]thiazin-6-yl)propyl)-3-(2-chloroethyl)urea ( <b>20</b> ).              | 26 |
| 13. NMR spectra and HR MS of <i>N</i> -(3-(8-chloroquino[3,2- <i>b</i> ]benzo[1,4]thiazin-6-yl)propyl)methanesulfonamide ( <b>22</b> ).          | 28 |
| 14. NMR spectra and HR MS of <i>N</i> -(3-(8-chloroquino[3,2- <i>b</i> ]benzo[1,4]thiazin-6-yl)propyl)-4-methylbenzenesulfonamide ( <b>24</b> ). | 30 |
| 15. NMR spectra and HR MS of 2-(4-(8-chloro quino[3,2- <i>b</i> ]benzo[1,4]thiazin-6-yl)butyl)isoindoline-1,3-dione ( <b>13</b> ).               | 32 |
| 16. NMR spectra and HR MS of 4-(8-chloroquino[3,2- <i>b</i> ]benzo[1,4]thiazin-6-yl)butan-1-amine ( <b>15</b> ).                                 | 34 |

|                                                                                                                                                           |    |
|-----------------------------------------------------------------------------------------------------------------------------------------------------------|----|
| 17. NMR spectra and HR MS of N-(4-(8-chloroquino[3,2-b]benzo[1,4]thiazin-6-yl)butyl)acetamide ( <b>17</b> ).                                              | 36 |
| 18. NMR spectra and HR MS of ethyl(4-(8-chloro-quino[3,2-b]benzo[1,4]thiazin-6-yl)butyl)carbamate ( <b>19</b> ).                                          | 38 |
| 19. NMR spectra and HR MS of 1-(4-(8-chloroquino[3,2-b]benzo[1,4]thiazin-6-yl)butyl)-3-(2-chloroethyl)urea ( <b>21</b> ).                                 | 40 |
| 20. NMR spectra and HR MS of N-(4-(8-chloroquino[3,2-b]benzo[1,4]thiazin-6-yl)butyl)methanesulfonamide ( <b>23</b> ).                                     | 42 |
| 21. NMR spectra and HR MS of N-(4-(8-chloroquino[3,2-b]benzo[1,4]thiazin-6-yl)butyl)-4-methylbenzenesulfonamide ( <b>25</b> ).                            | 44 |
| 22. NMR spectra and HR MS of 8-chloro-6-((1-phenyl-1 <i>H</i> -1,2,3-triazol-4-yl)methyl)-quino[3,2-b]benzo[1,4]thiazine ( <b>27</b> ).                   | 46 |
| 23. NMR spectra and HR MS 8-chloro-6-((1-(4-(trifluoromethyl)phenyl)-1 <i>H</i> -1,2,3-triazol-4-yl)methyl)-quino[3,2-b]benzo[1,4]thiazine ( <b>28</b> ). | 48 |
| 24. NMR spectra and HR MS of 6-((1-benzyl-1 <i>H</i> -1,2,3-triazol-4-yl)methyl)-8-chloroquino[3,2-b]benzo[1,4]thiazine ( <b>29</b> ).                    | 50 |
| 25. NMR spectra and HR MS of 8-chloro-6-((1-(4-fluorobenzyl)-1 <i>H</i> -1,2,3-triazol-4-yl)methyl)-quino[3,2-b]benzo[1,4]thiazine ( <b>30</b> ).         | 52 |
| 26. NMR spectra and HR MS of 8-chloro-6-((1-(4-chlorobenzyl)-1 <i>H</i> -1,2,3-triazol-4-yl)methyl)-quino[3,2-b]benzo[1,4]thiazine ( <b>31</b> ).         | 54 |
| 27. NMR spectra and HR MS of 4-(((8-chloroquino[3,2-b]benzo[1,4]thiazin-6-yl)methyl)-1 <i>H</i> -1,2,3-triazol-1-yl)methyl)benzonitrile ( <b>32</b> ).    | 56 |
| 28. NMR spectra and HR MS of 8-chloro-6-((1-((phenylthio)methyl)-1 <i>H</i> -1,2,3-triazol-4-yl)methyl)-quino[3,2-b]benzo[1,4]thiazine ( <b>33</b> ).     | 57 |

1. NMR spectra and HR MS of 6*H*-8-chloroquino[3,2-b]benzo[1,4]thiazine (**5**).

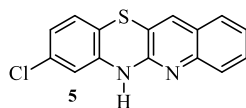

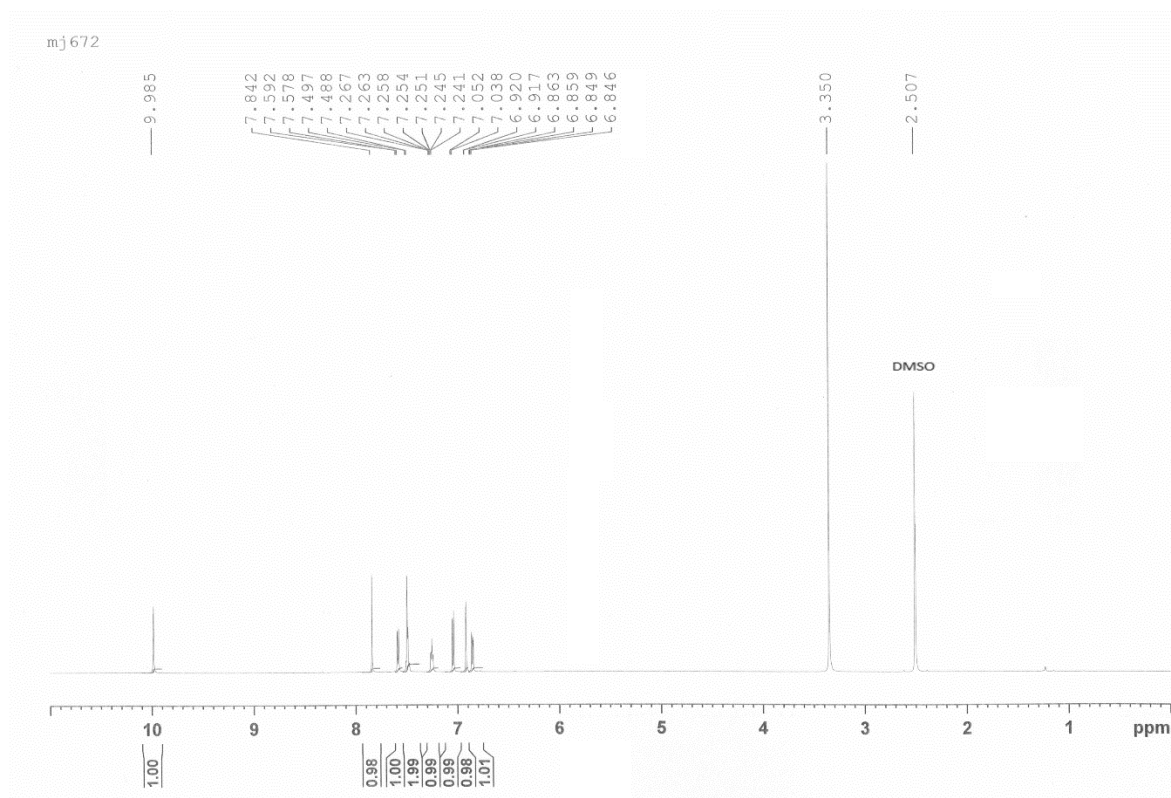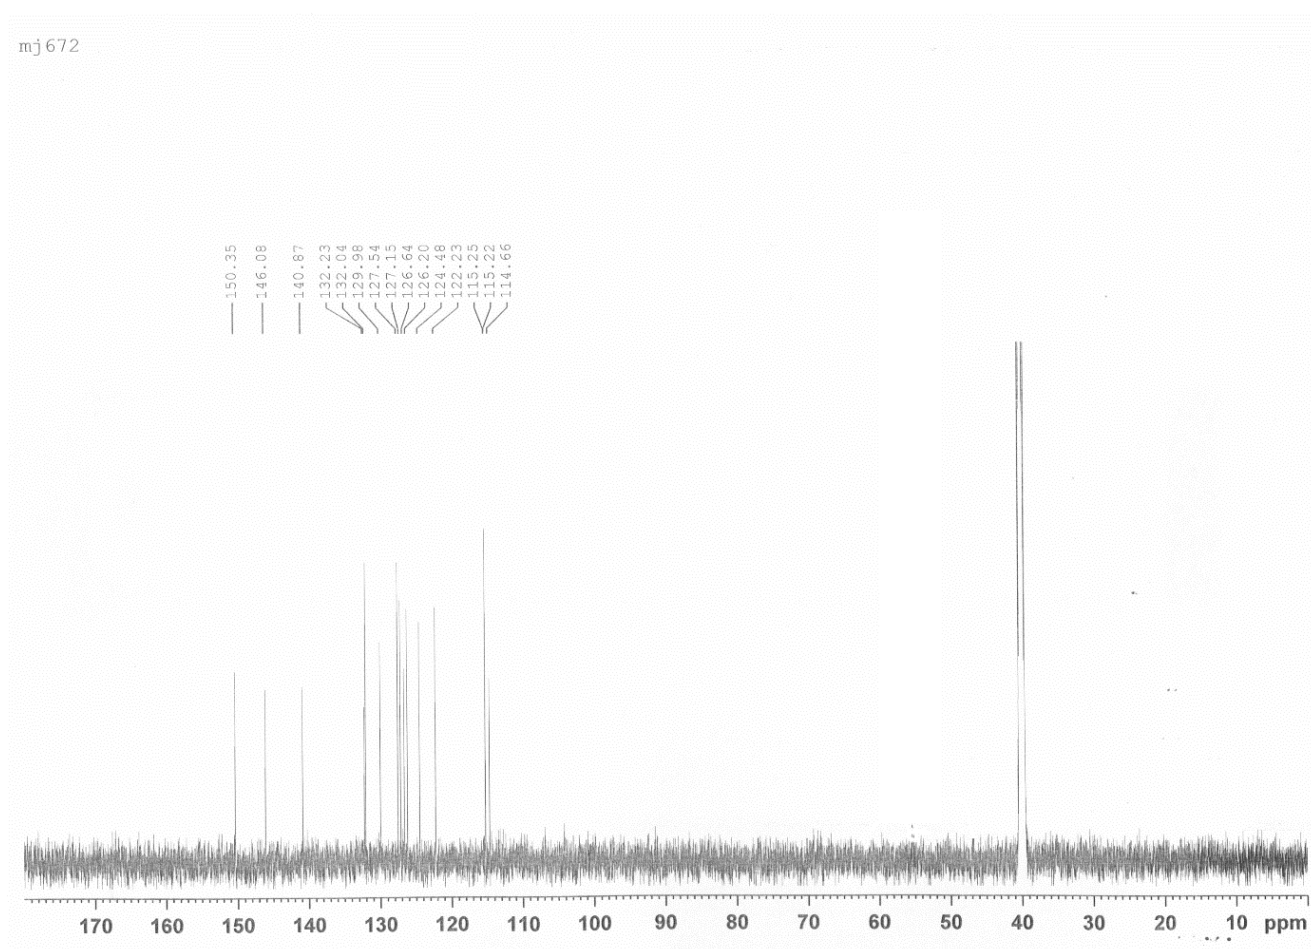

# Acquisition Parameter

|             |          |                      |          |                  |           |
|-------------|----------|----------------------|----------|------------------|-----------|
| Source Type | ESI      | Ion Polarity         | Positive | Set Nebulizer    | 0.3 Bar   |
| Focus       | Active   | Set Capillary        | 4000 V   | Set Dry Heater   | 200 °C    |
| Scan Begin  | 100 m/z  | Set End Plate Offset | -500 V   | Set Dry Gas      | 3.0 l/min |
| Scan End    | 1000 m/z | Set Charging Voltage | 2000 V   | Set Divert Valve | Source    |
|             |          | Set Corona           | 0 nA     | Set APCI Heater  | 0 °C      |

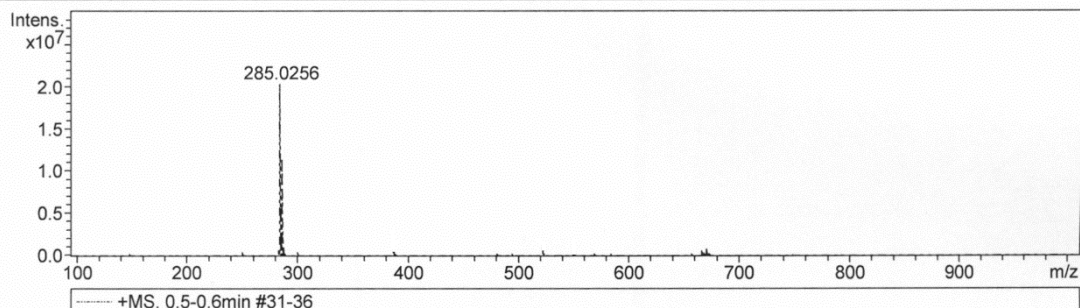

| # | m/z      | Res.  | S/N     | I        | I %   | FWHM   |
|---|----------|-------|---------|----------|-------|--------|
| 1 | 285.0256 | 17668 | 56320.7 | 20377480 | 100.0 | 0.0161 |
| 2 | 287.0218 | 37360 | 31654.5 | 11533646 | 56.6  | 0.0077 |

## 2. NMR spectra and HR MS of 8-chloro-6-methylquino[3,2-b]benzo[1,4]thiazine (6).

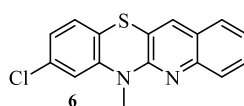

mj 753 proton

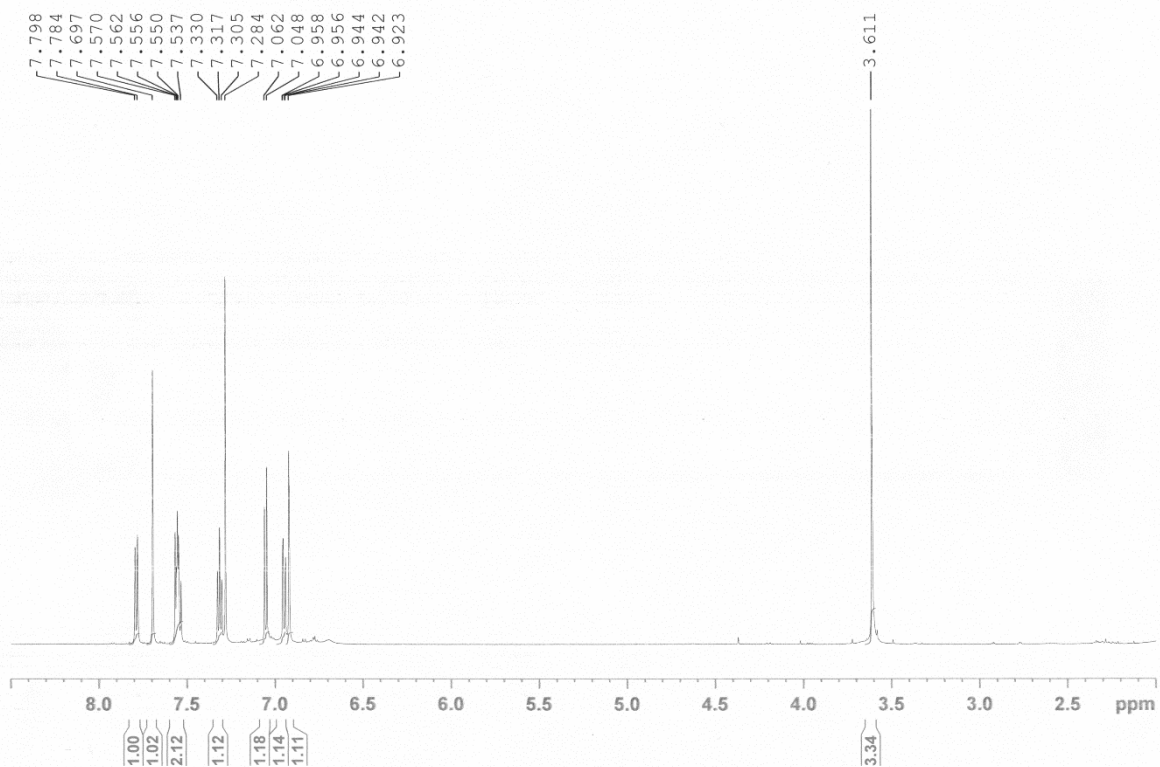



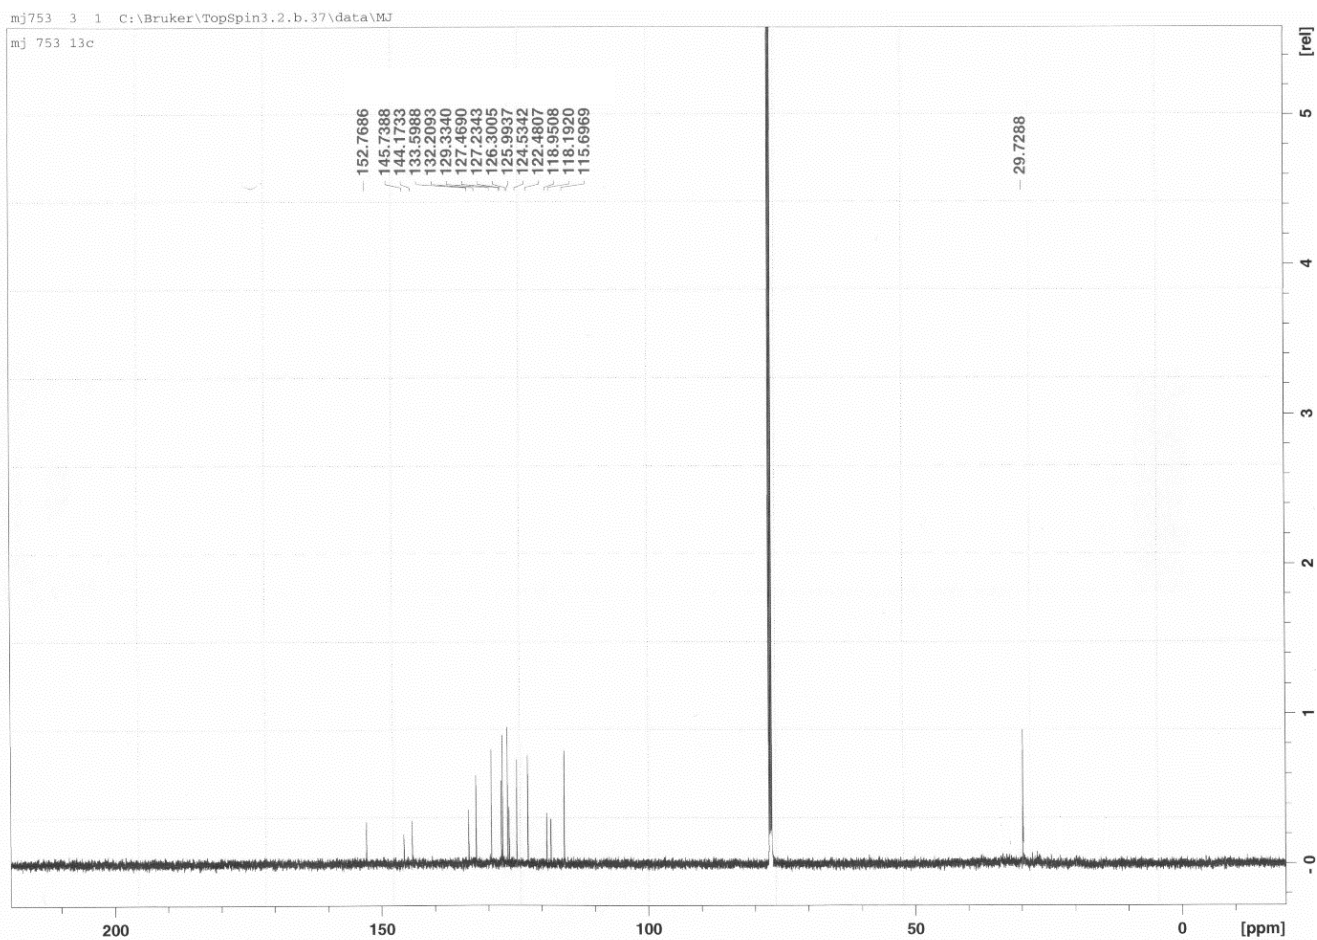

#### Acquisition Parameter

|             |          |                      |          |                  |           |
|-------------|----------|----------------------|----------|------------------|-----------|
| Source Type | ESI      | Ion Polarity         | Positive | Set Nebulizer    | 0.3 Bar   |
| Focus       | Active   | Set Capillary        | 4000 V   | Set Dry Heater   | 240 °C    |
| Scan Begin  | 100 m/z  | Set End Plate Offset | -500 V   | Set Dry Gas      | 4.0 l/min |
| Scan End    | 1000 m/z | Set Charging Voltage | 2000 V   | Set Divert Valve | Source    |
|             |          | Set Corona           | 0 nA     | Set APCI Heater  | 0 °C      |

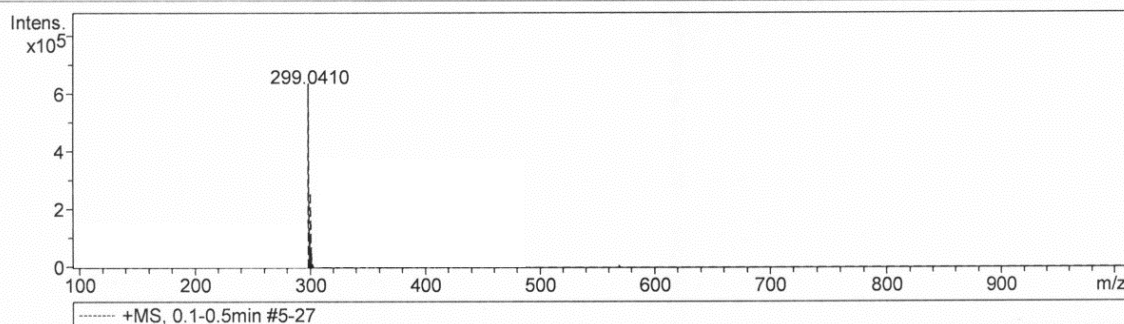

| # | m/z      | Res.  | S/N    | I      | I %   | FWHM   |
|---|----------|-------|--------|--------|-------|--------|
| 1 | 299.0410 | 22712 | 9224.3 | 617903 | 100.0 | 0.0132 |

mj 753 roesy

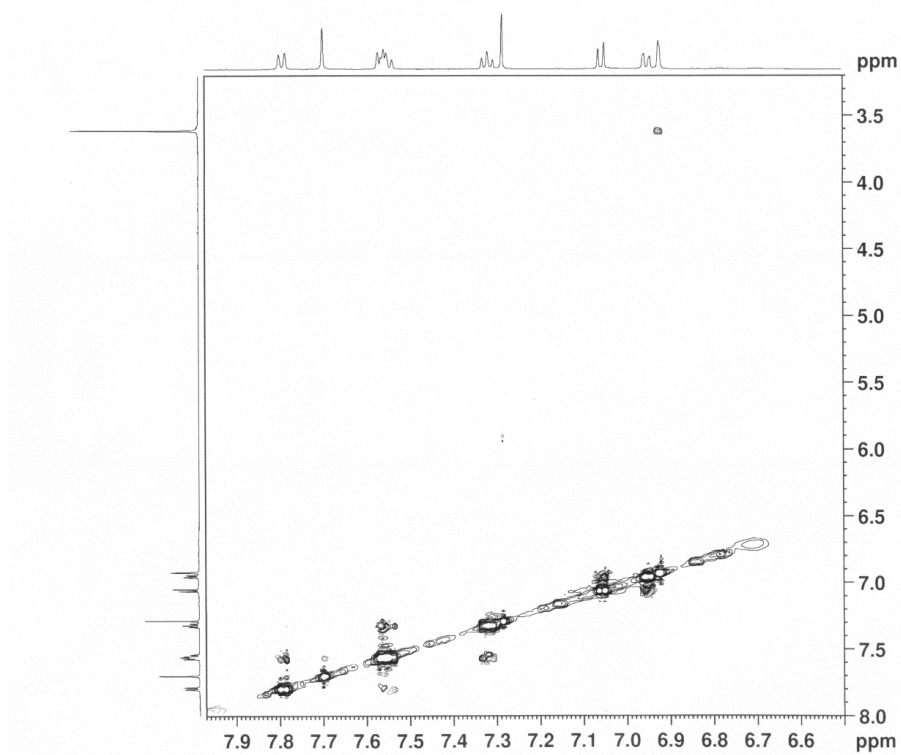

mj 753 cosy

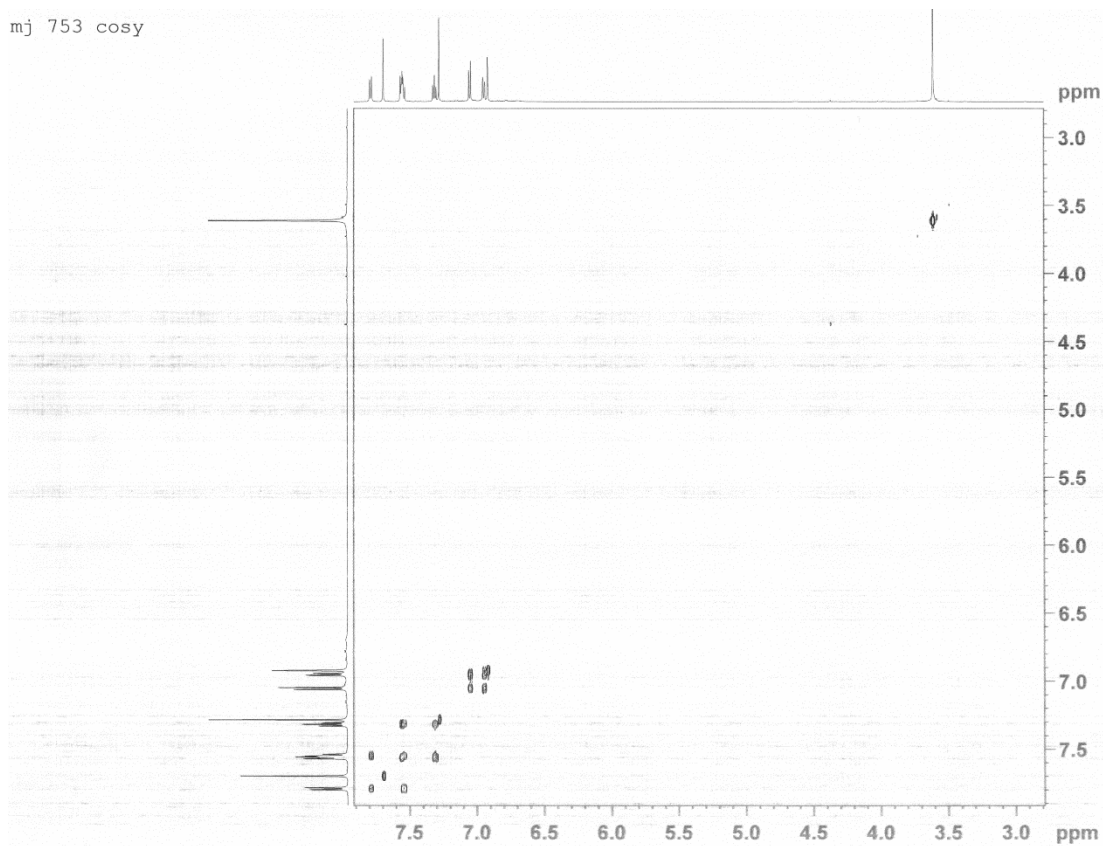

mj 753 cosy

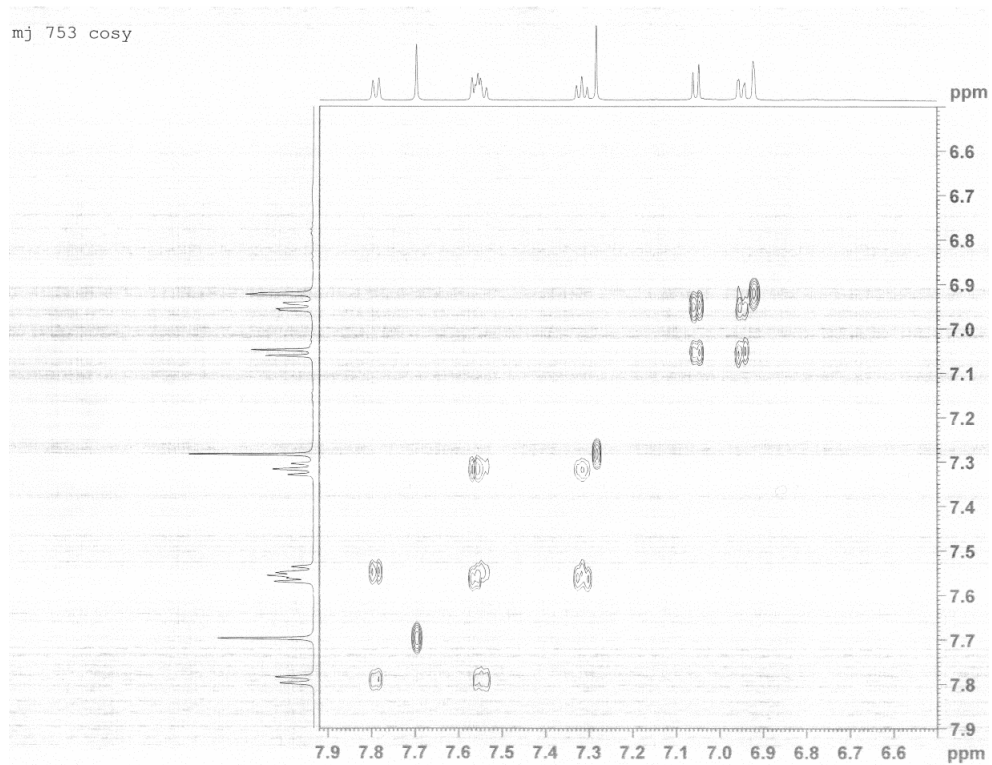

mj 753 hsqc

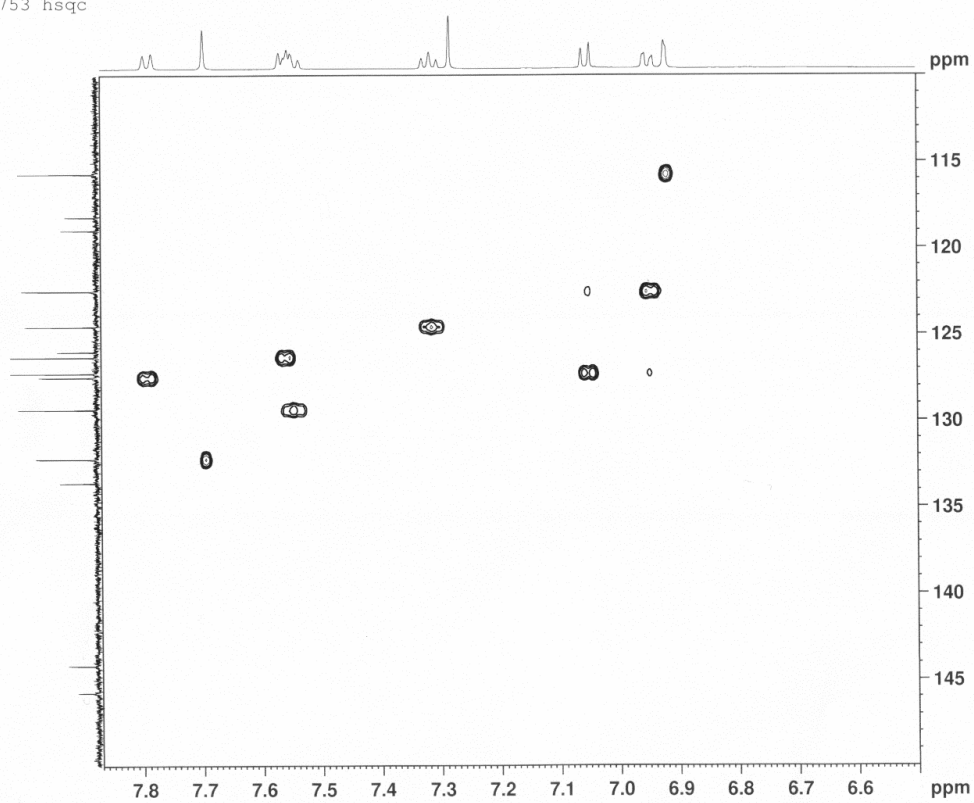

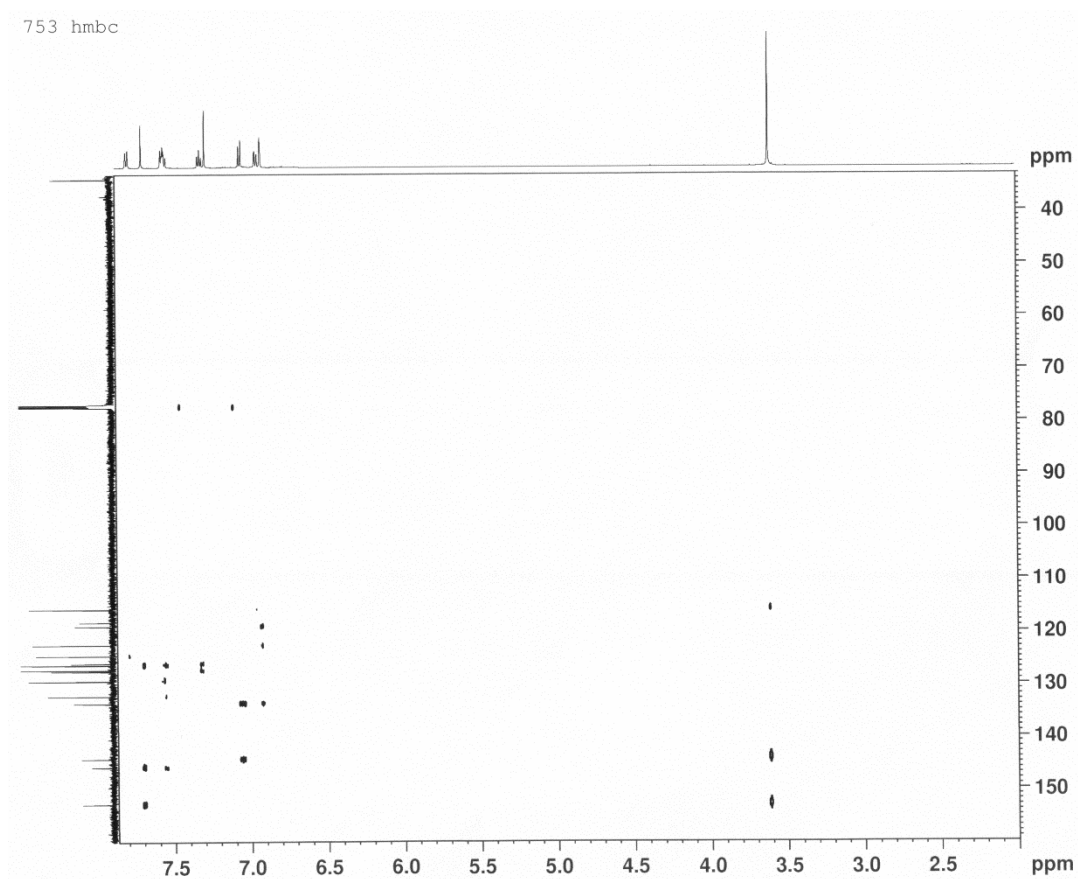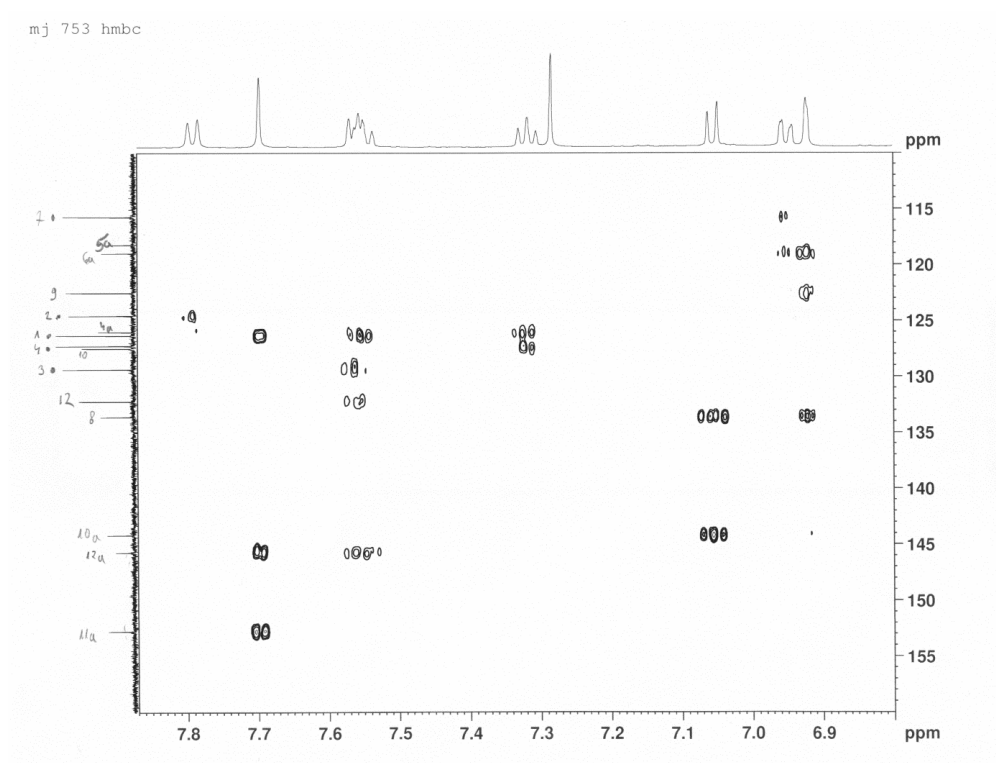

3. NMR spectra and HR MS of 2-(8-chloroquino[3,2-b]benzo[1,4]thiazin-6-yl)-N,N-diethylethan-1-amine (**7**)

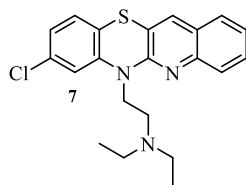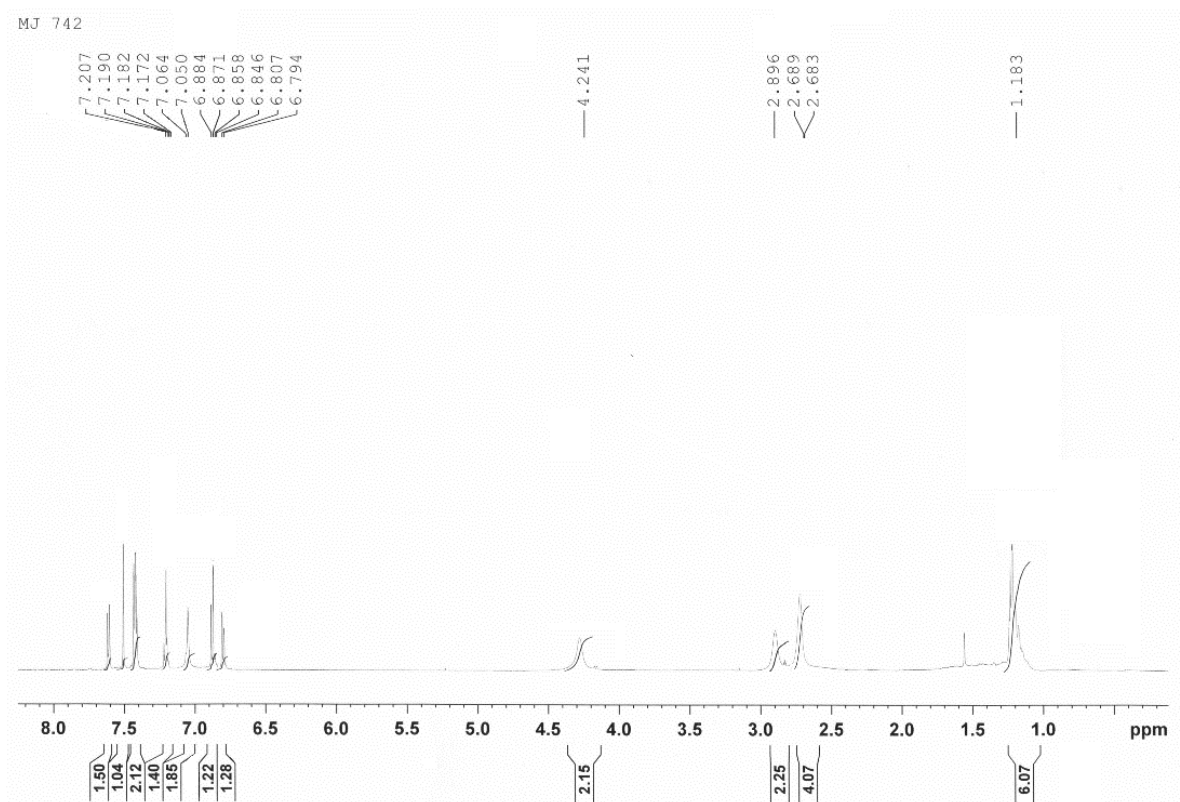

13C NMR spectrum of compound 10. The x-axis represents chemical shift in ppm, ranging from 170 to 10. The spectrum shows several peaks in the aromatic region (110-150 ppm), a large solvent peak at approximately 77 ppm, and a peak at approximately 10 ppm. An inset shows a zoomed-in view of the aromatic region with peak labels.

| Chemical Shift (ppm) |
|----------------------|
| 150.2                |
| 148.5                |
| 147.8                |
| 146.2                |
| 145.5                |
| 144.8                |
| 143.2                |
| 142.5                |
| 141.8                |
| 140.2                |
| 139.5                |
| 138.8                |
| 137.2                |
| 136.5                |
| 135.8                |
| 134.2                |
| 133.5                |
| 132.8                |
| 131.2                |
| 130.5                |
| 129.8                |
| 128.2                |
| 127.5                |
| 126.8                |
| 125.2                |
| 124.5                |
| 123.8                |
| 122.2                |
| 121.5                |
| 120.8                |
| 119.2                |
| 118.5                |
| 117.8                |
| 116.2                |
| 115.5                |
| 114.8                |
| 113.2                |
| 112.5                |
| 111.8                |
| 110.2                |
| 109.5                |
| 108.8                |
| 107.2                |
| 106.5                |
| 105.8                |
| 104.2                |
| 103.5                |
| 102.8                |
| 101.2                |
| 100.5                |
| 99.8                 |
| 98.2                 |
| 97.5                 |
| 96.8                 |
| 95.2                 |
| 94.5                 |
| 93.8                 |
| 92.2                 |
| 91.5                 |
| 90.8                 |
| 89.2                 |
| 88.5                 |
| 87.8                 |
| 86.2                 |
| 85.5                 |
| 84.8                 |
| 83.2                 |
| 82.5                 |
| 81.8                 |
| 80.2                 |
| 79.5                 |
| 78.8                 |
| 77.2                 |
| 76.5                 |
| 75.8                 |
| 74.2                 |
| 73.5                 |
| 72.8                 |
| 71.2                 |
| 70.5                 |
| 69.8                 |
| 68.2                 |
| 67.5                 |
| 66.8                 |
| 65.2                 |
| 64.5                 |
| 63.8                 |
| 62.2                 |
| 61.5                 |
| 60.8                 |
| 59.2                 |
| 58.5                 |
| 57.8                 |
| 56.2                 |
| 55.5                 |
| 54.8                 |
| 53.2                 |
| 52.5                 |
| 51.8                 |
| 50.2                 |
| 49.5                 |
| 48.8                 |
| 47.2                 |
| 46.5                 |
| 45.8                 |
| 44.2                 |
| 43.5                 |
| 42.8                 |
| 41.2                 |
| 40.5                 |
| 39.8                 |
| 38.2                 |
| 37.5                 |
| 36.8                 |
| 35.2                 |
| 34.5                 |
| 33.8                 |
| 32.2                 |
| 31.5                 |
| 30.8                 |
| 29.2                 |
| 28.5                 |
| 27.8                 |
| 26.2                 |
| 25.5                 |
| 24.8                 |
| 23.2                 |
| 22.5                 |
| 21.8                 |
| 20.2                 |
| 19.5                 |
| 18.8                 |
| 17.2                 |
| 16.5                 |
| 15.8                 |
| 14.2                 |
| 13.5                 |
| 12.8                 |
| 11.2                 |
| 10.5                 |
| 9.8                  |
| 8.2                  |
| 7.5                  |
| 6.8                  |
| 5.2                  |
| 4.5                  |
| 3.8                  |
| 2.2                  |
| 1.5                  |
| 0.8                  |

|             |            |                      |          |                  |           |
|-------------|------------|----------------------|----------|------------------|-----------|
| Source Type | ESI        | Ion Polarity         | Positive | Set Nebulizer    | 0.3 Bar   |
| Focus       | Not active | Set Capillary        | 4000 V   | Set Dry Heater   | 200 °C    |
| Scan Begin  | 100 m/z    | Set End Plate Offset | -500 V   | Set Dry Gas      | 3.0 l/min |
| Scan End    | 1000 m/z   | Set Charging Voltage | 2000 V   | Set Divert Valve | Source    |
|             |            | Set Corona           | 0 nA     | Set APCI Heater  | 0 °C      |

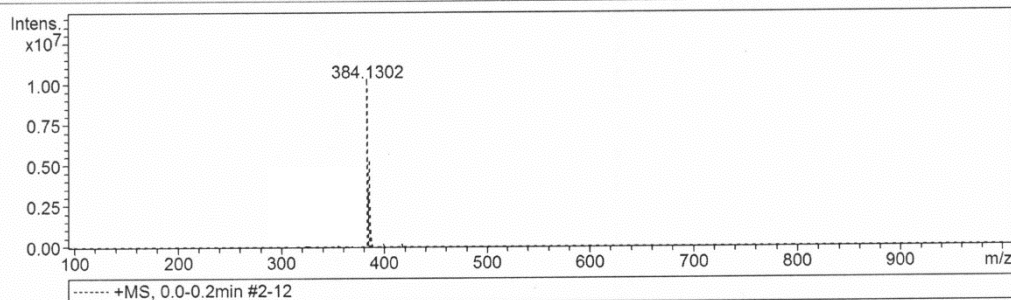

10

4. NMR spectra and HR MS of 3-(8-chloroquino[3,2-b]benzo[1,4]thiazin-6-yl)-N,N-dimethylpropan-1-amine (**8**).

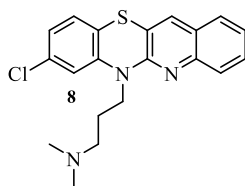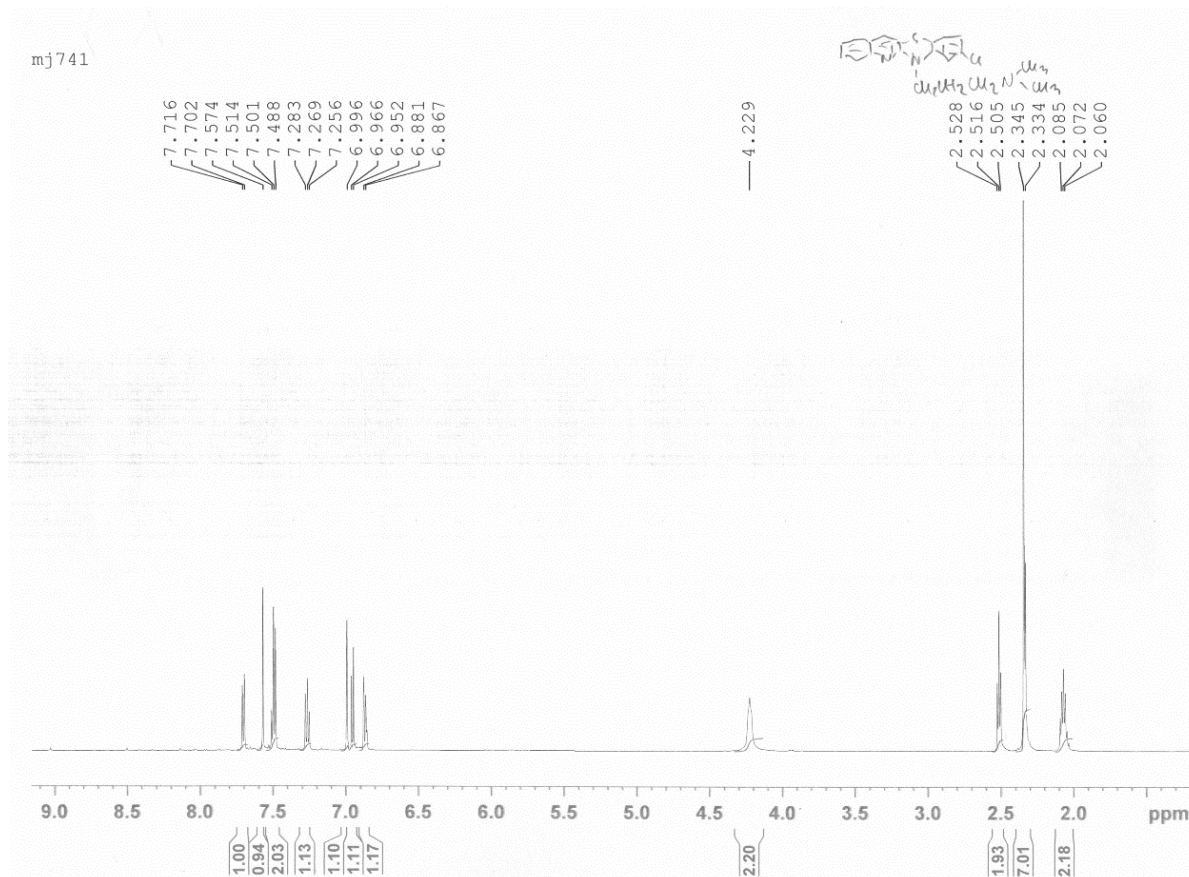



mj741

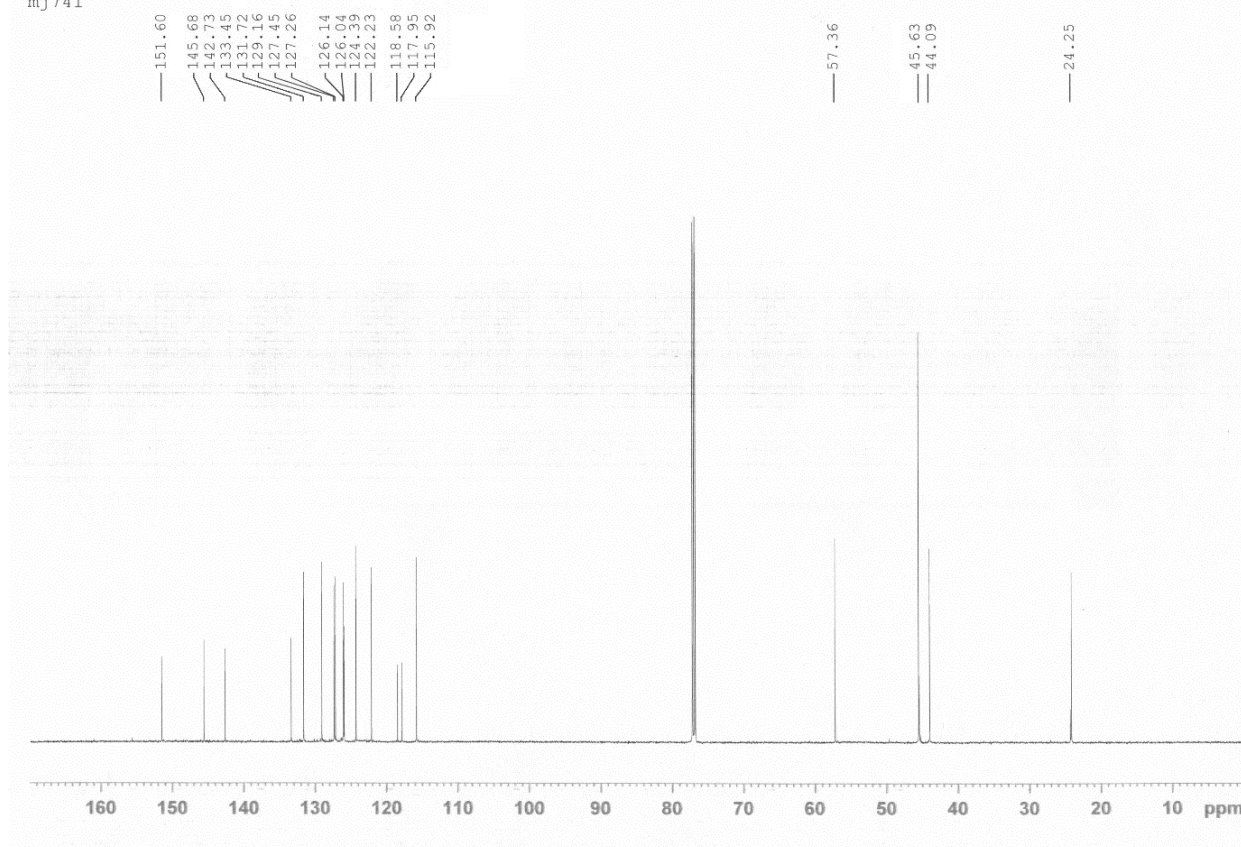

#### Acquisition Parameter

|             |            |                      |          |                  |           |
|-------------|------------|----------------------|----------|------------------|-----------|
| Source Type | ESI        | Ion Polarity         | Positive | Set Nebulizer    | 0.3 Bar   |
| Focus       | Not active | Set Capillary        | 4000 V   | Set Dry Heater   | 200 °C    |
| Scan Begin  | 100 m/z    | Set End Plate Offset | -500 V   | Set Dry Gas      | 3.0 l/min |
| Scan End    | 1000 m/z   | Set Charging Voltage | 2000 V   | Set Divert Valve | Source    |
|             |            | Set Corona           | 0 nA     | Set APCI Heater  | 0 °C      |

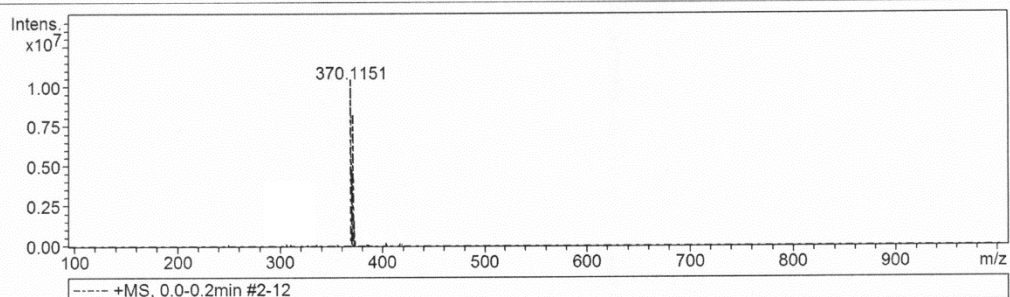

| # | m/z      | Res.  | S/N     | I        | I %   | FWHM   |
|---|----------|-------|---------|----------|-------|--------|
| 1 | 370.1151 | 8103  | 56136.2 | 10188798 | 100.0 | 0.0457 |
| 2 | 372.1123 | 13546 | 43737.8 | 7961009  | 78.1  | 0.0275 |



5. NMR spectra and HR MS of 8-chloro-6-(2-(pyrrolidin-1-yl)ethyl)-quino[3,2-b]benzo[1,4]thiazine (9).

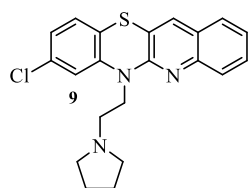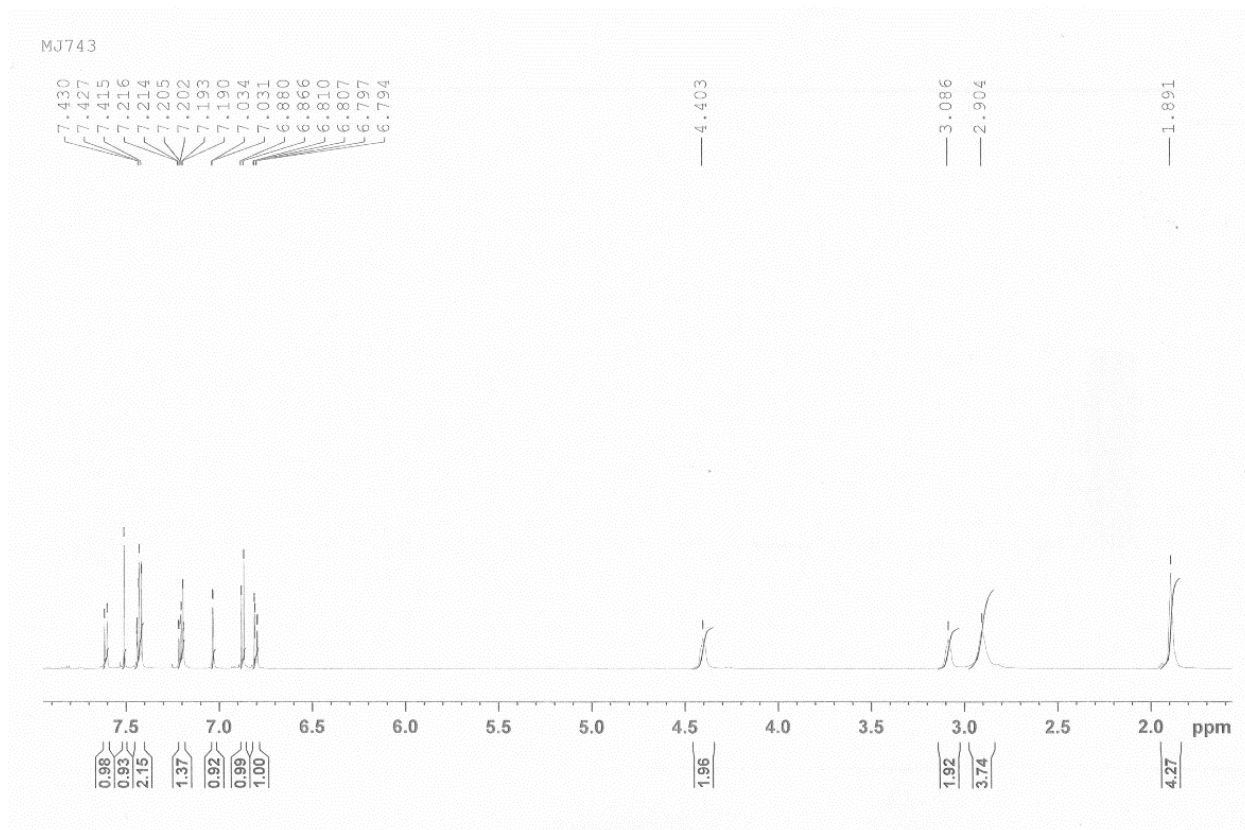

MJ743

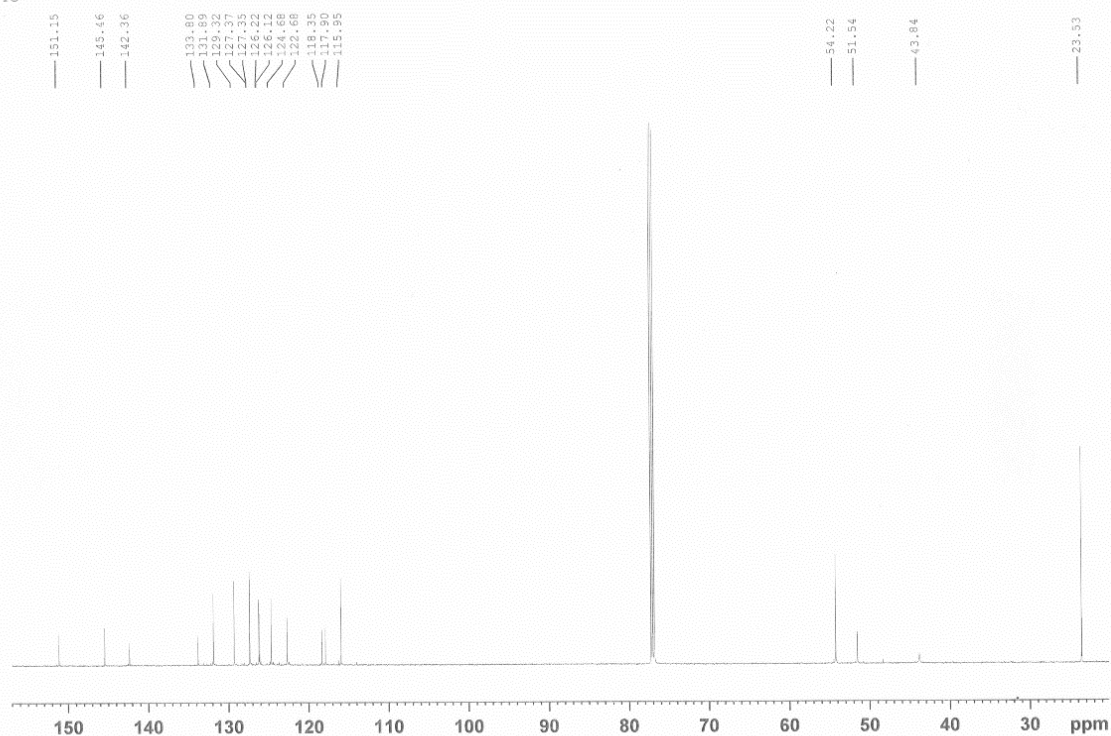

#### Acquisition Parameter

|             |            |                      |          |                  |           |
|-------------|------------|----------------------|----------|------------------|-----------|
| Source Type | ESI        | Ion Polarity         | Positive | Set Nebulizer    | 0.3 Bar   |
| Focus       | Not active | Set Capillary        | 4000 V   | Set Dry Heater   | 200 °C    |
| Scan Begin  | 100 m/z    | Set End Plate Offset | -500 V   | Set Dry Gas      | 3.0 l/min |
| Scan End    | 1000 m/z   | Set Charging Voltage | 2000 V   | Set Divert Valve | Source    |
|             |            | Set Corona           | 0 nA     | Set APCI Heater  | 0 °C      |

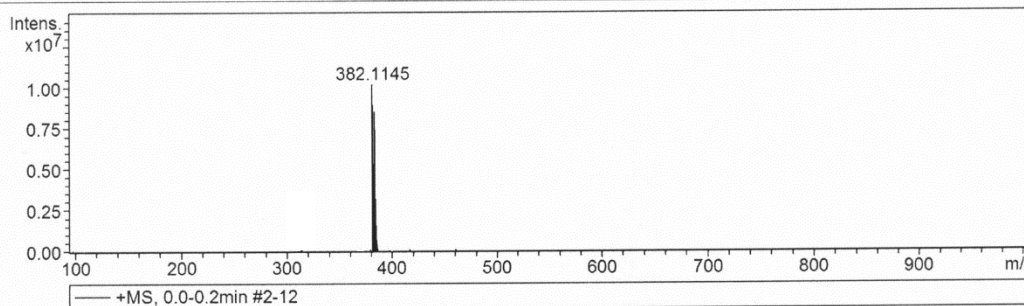

| # | m/z      | Res.  | S/N     | I        | I %   | FWHM   |
|---|----------|-------|---------|----------|-------|--------|
| 1 | 382.1145 | 7782  | 81007.5 | 10188798 | 100.0 | 0.0491 |
| 2 | 384.1118 | 13403 | 67270.0 | 8484336  | 83.3  | 0.0287 |

6. NMR spectra and HR MS of 8-chloro-6-(2-(piperidin-1-yl)ethyl)-quino[3,2-b]benzo[1,4]thiazine (10).

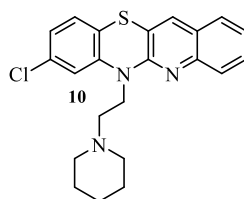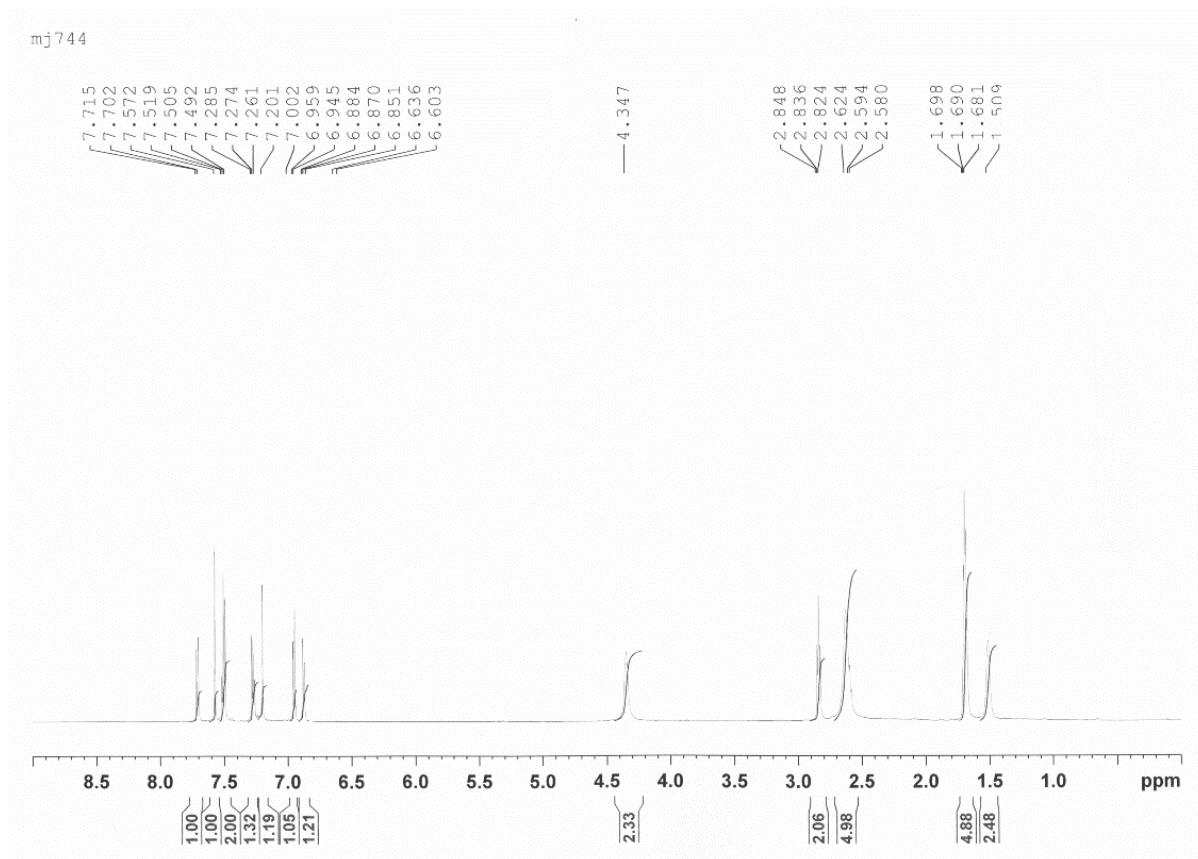

mj74413c

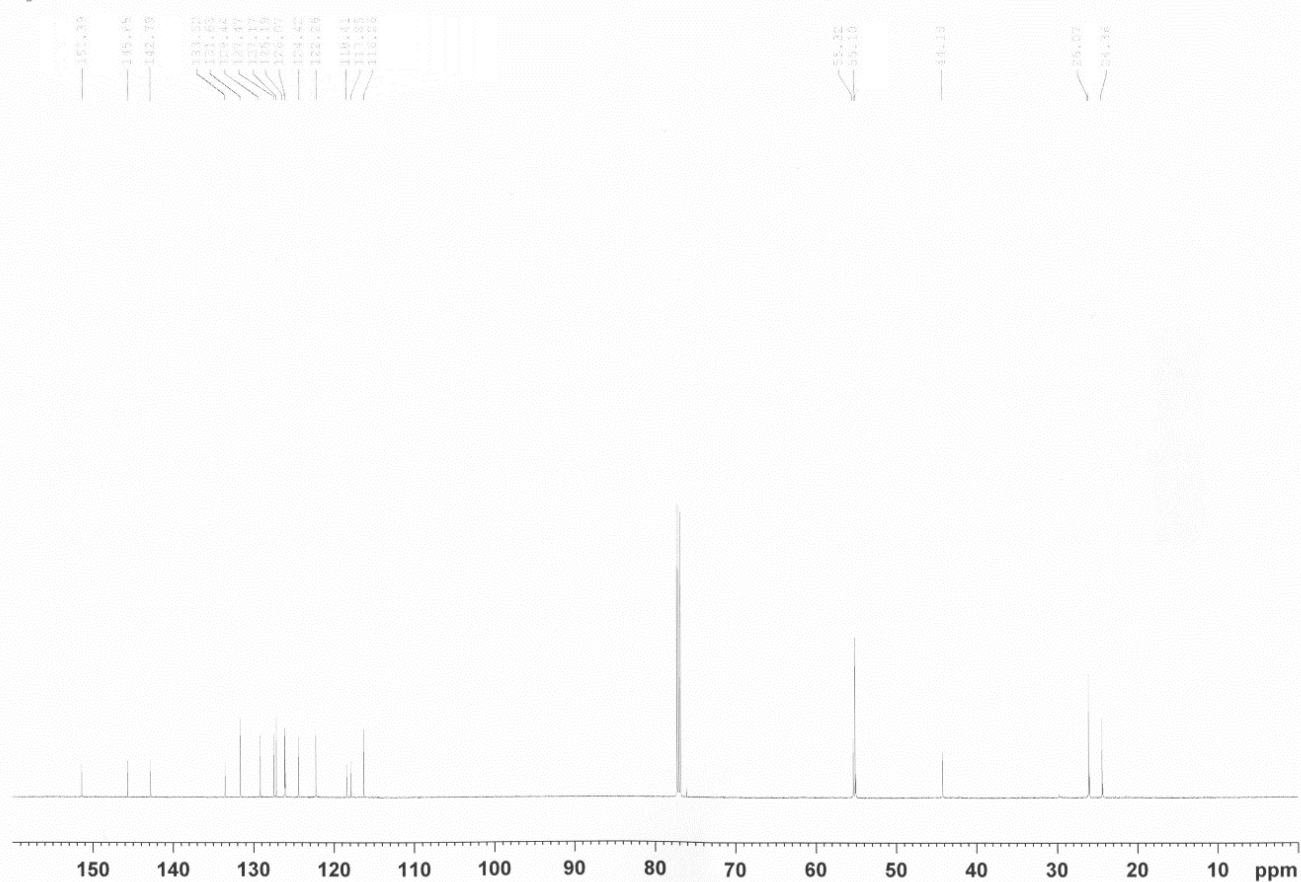

# Acquisition Parameter

|             |            |                      |          |                  |           |
|-------------|------------|----------------------|----------|------------------|-----------|
| Source Type | ESI        | Ion Polarity         | Positive | Set Nebulizer    | 0.3 Bar   |
| Focus       | Not active | Set Capillary        | 4000 V   | Set Dry Heater   | 200 °C    |
| Scan Begin  | 100 m/z    | Set End Plate Offset | -500 V   | Set Dry Gas      | 3.0 l/min |
| Scan End    | 1000 m/z   | Set Charging Voltage | 2000 V   | Set Divert Valve | Source    |
|             |            | Set Corona           | 0 nA     | Set APCI Heater  | 0 °C      |

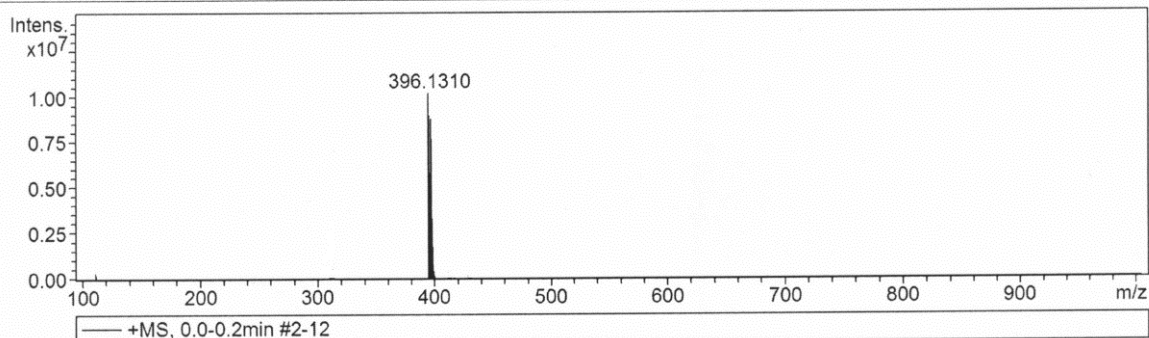

| # | m/z      | Res.  | S/N     | I        | I %   | FWHM   |
|---|----------|-------|---------|----------|-------|--------|
| 1 | 396.1310 | 7738  | 94773.6 | 10188798 | 100.0 | 0.0512 |
| 2 | 398.1282 | 13593 | 81523.1 | 8789789  | 86.3  | 0.0293 |

7. NMR spectra and HR MS of 8-chloro-6-(2-(1-methylpiperidin-2-yl)ethyl)-quino[3,2-b]benzo[1,4]thiazine (**11**).

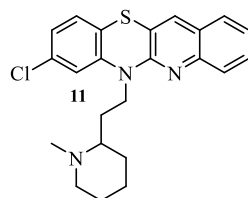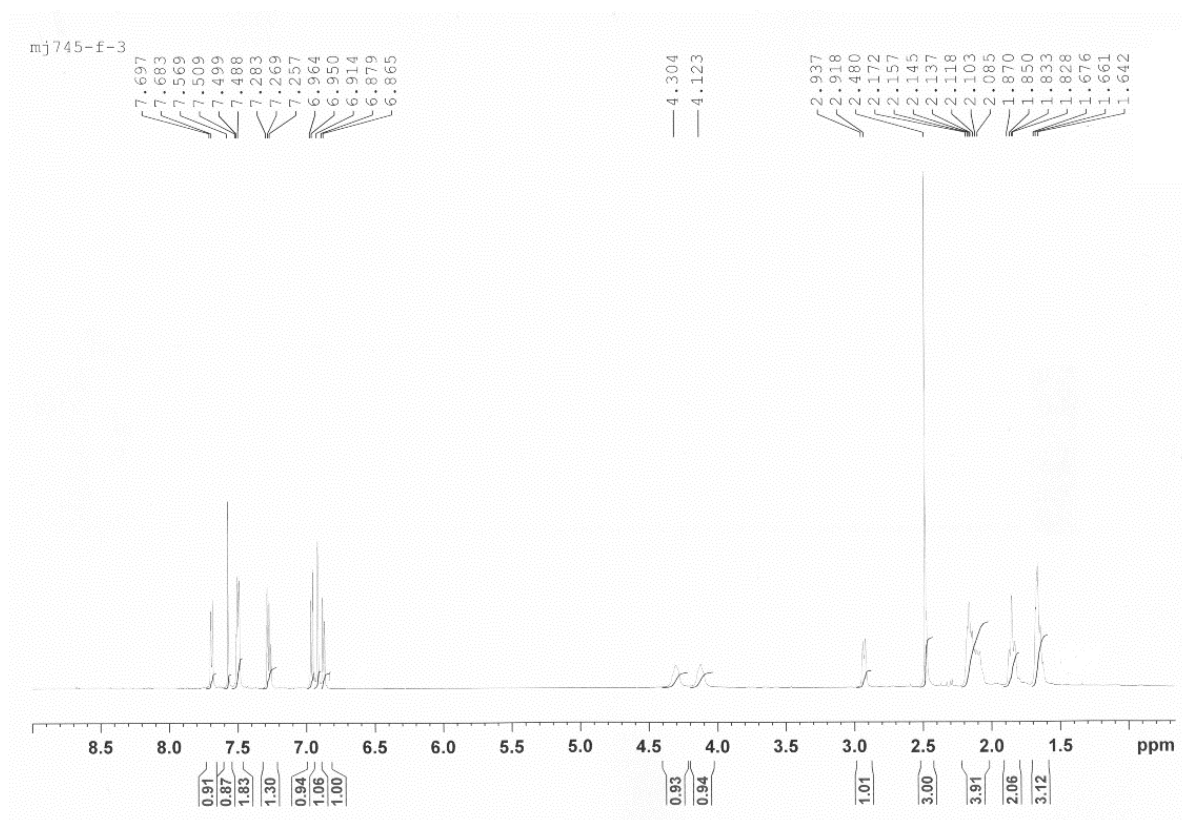

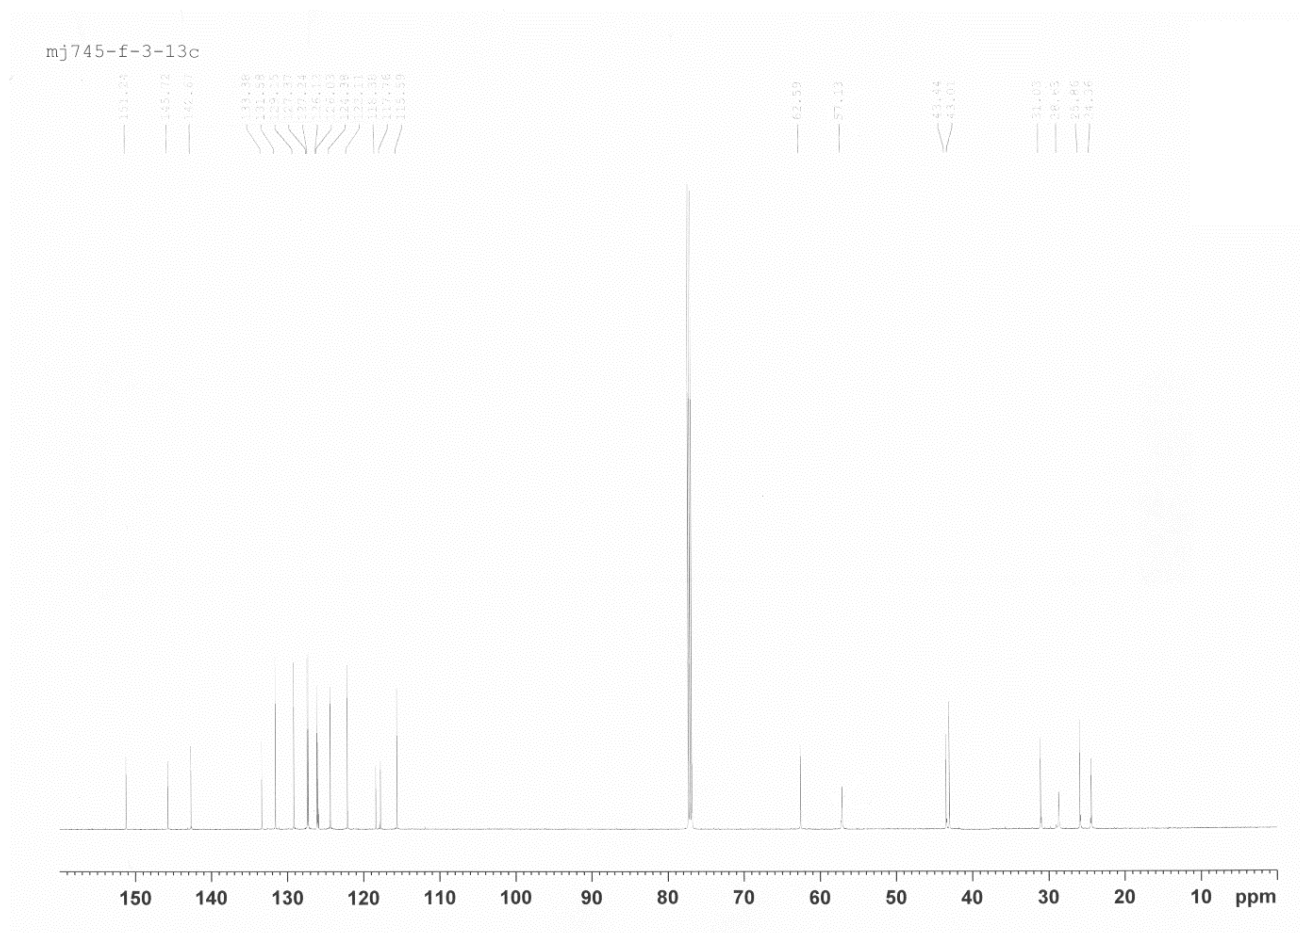

#### Acquisition Parameter

|             |            |                      |          |                  |           |
|-------------|------------|----------------------|----------|------------------|-----------|
| Source Type | ESI        | Ion Polarity         | Positive | Set Nebulizer    | 0.3 Bar   |
| Focus       | Not active | Set Capillary        | 4000 V   | Set Dry Heater   | 200 °C    |
| Scan Begin  | 100 m/z    | Set End Plate Offset | -500 V   | Set Dry Gas      | 3.0 l/min |
| Scan End    | 1000 m/z   | Set Charging Voltage | 2000 V   | Set Divert Valve | Source    |
|             |            | Set Corona           | 0 nA     | Set APCI Heater  | 0 °C      |

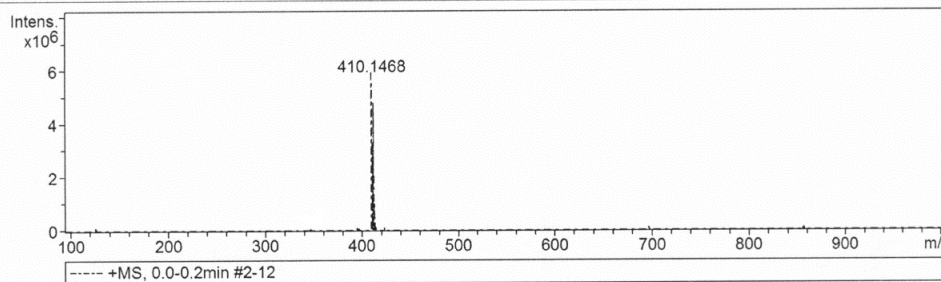

| # | m/z      | Res.  | S/N     | I       | I %   | FWHM   |
|---|----------|-------|---------|---------|-------|--------|
| 1 | 410.1468 | 8116  | 88496.9 | 5767489 | 100.0 | 0.0505 |
| 2 | 412.1442 | 13609 | 70653.7 | 4628476 | 80.3  | 0.0303 |

8. NMR spectra and HR MS of 2-(3-(8-chloroquino[3,2-b]benzo[1,4]thiazin-6-yl)propyl)isoindoline-1,3-dione (**12**).

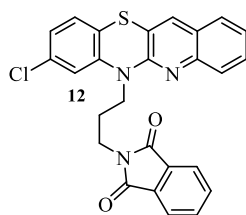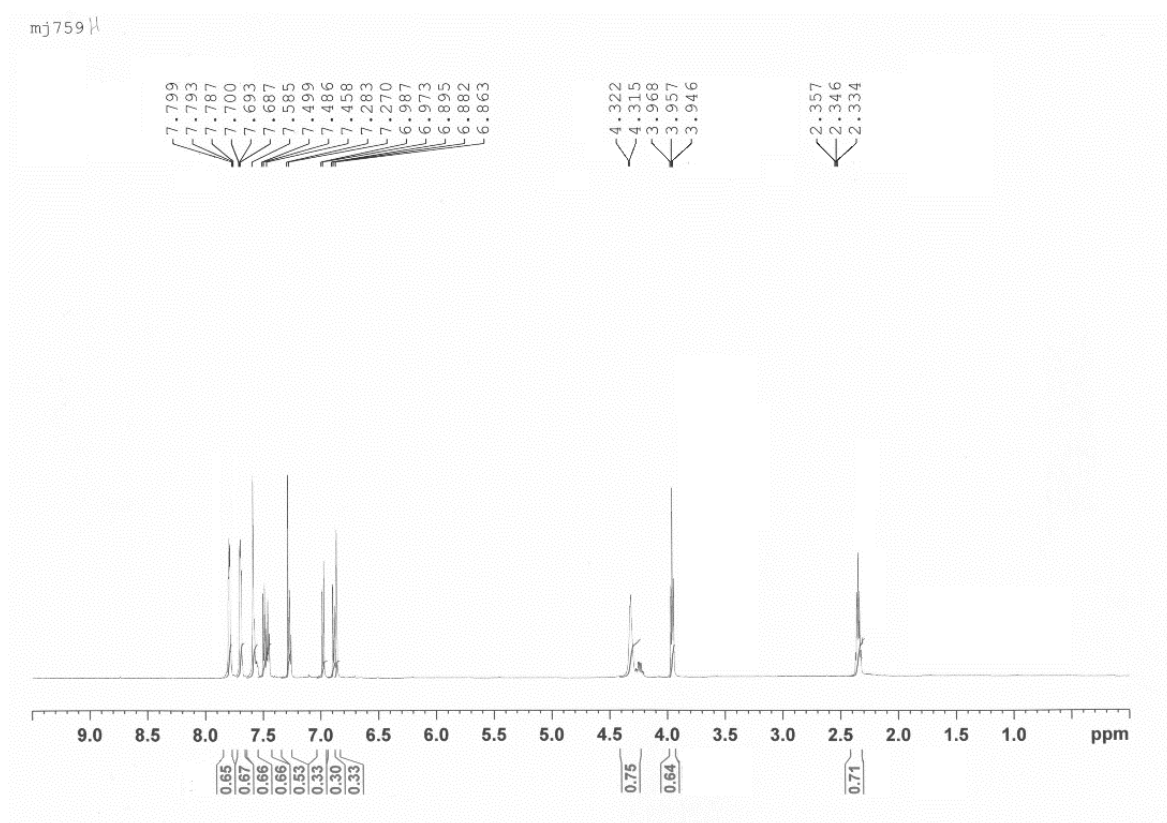



mj759 13c

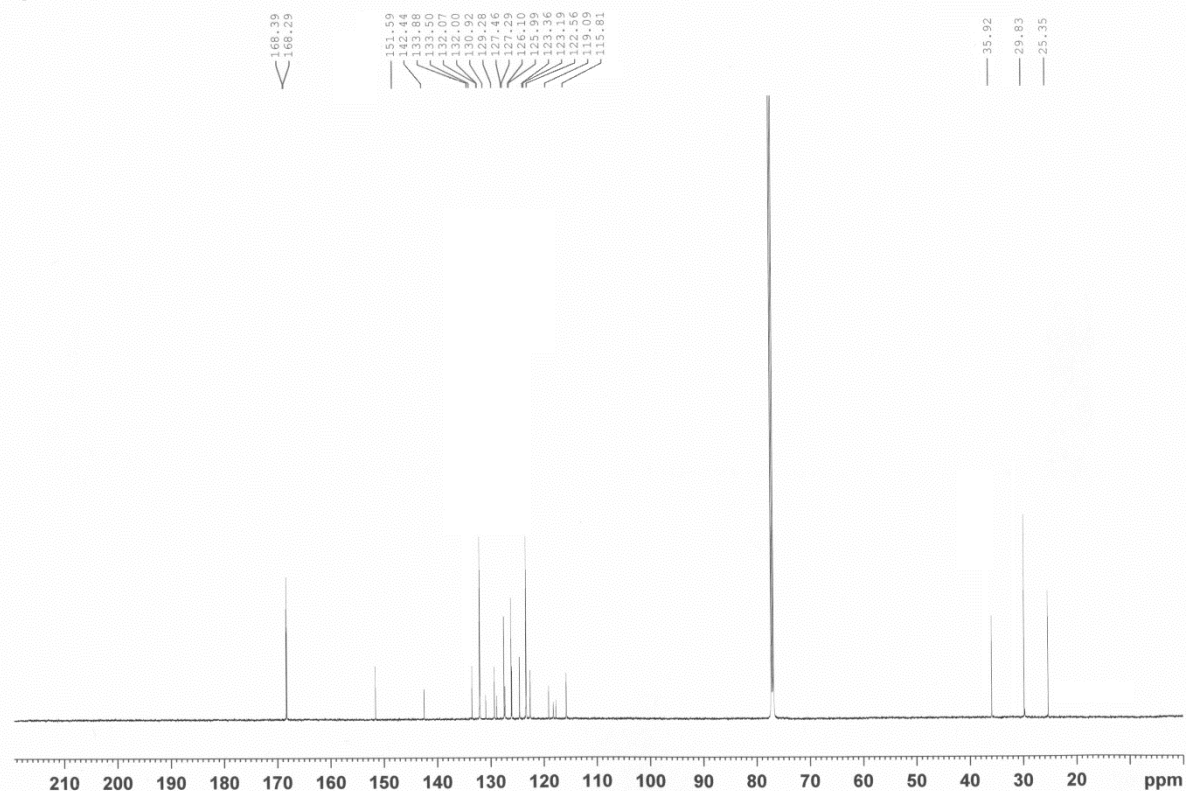

#### Acquisition Parameter

|             |         |                      |          |                  |           |
|-------------|---------|----------------------|----------|------------------|-----------|
| Source Type | ESI     | Ion Polarity         | Positive | Set Nebulizer    | 0.3 Bar   |
| Focus       | Active  | Set Capillary        | 4000 V   | Set Dry Heater   | 240 °C    |
| Scan Begin  | 100 m/z | Set End Plate Offset | -500 V   | Set Dry Gas      | 4.0 l/min |
| Scan End    | 500 m/z | Set Charging Voltage | 2000 V   | Set Divert Valve | Source    |
|             |         | Set Corona           | 0 nA     | Set APCI Heater  | 0 °C      |

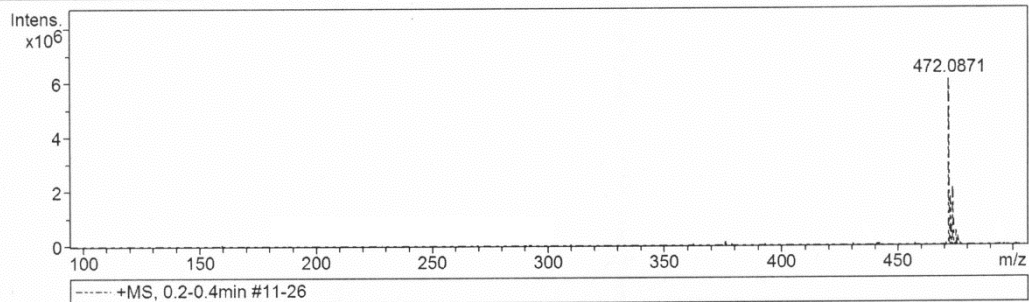

| # | m/z      | Res.  | S/N     | I       | I %   | FWHM   |
|---|----------|-------|---------|---------|-------|--------|
| 1 | 472.0871 | 37225 | 12528.0 | 6128841 | 100.0 | 0.0127 |
| 2 | 474.0836 | 26588 | 4409.6  | 2159305 | 35.2  | 0.0178 |



9. NMR spectra and HR MS of 3-(8-chloroquino[3,2-b]benzo[1,4]thiazin-6-yl)propan-1-amine  
(14).

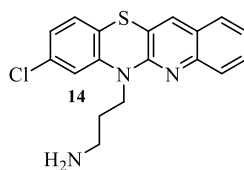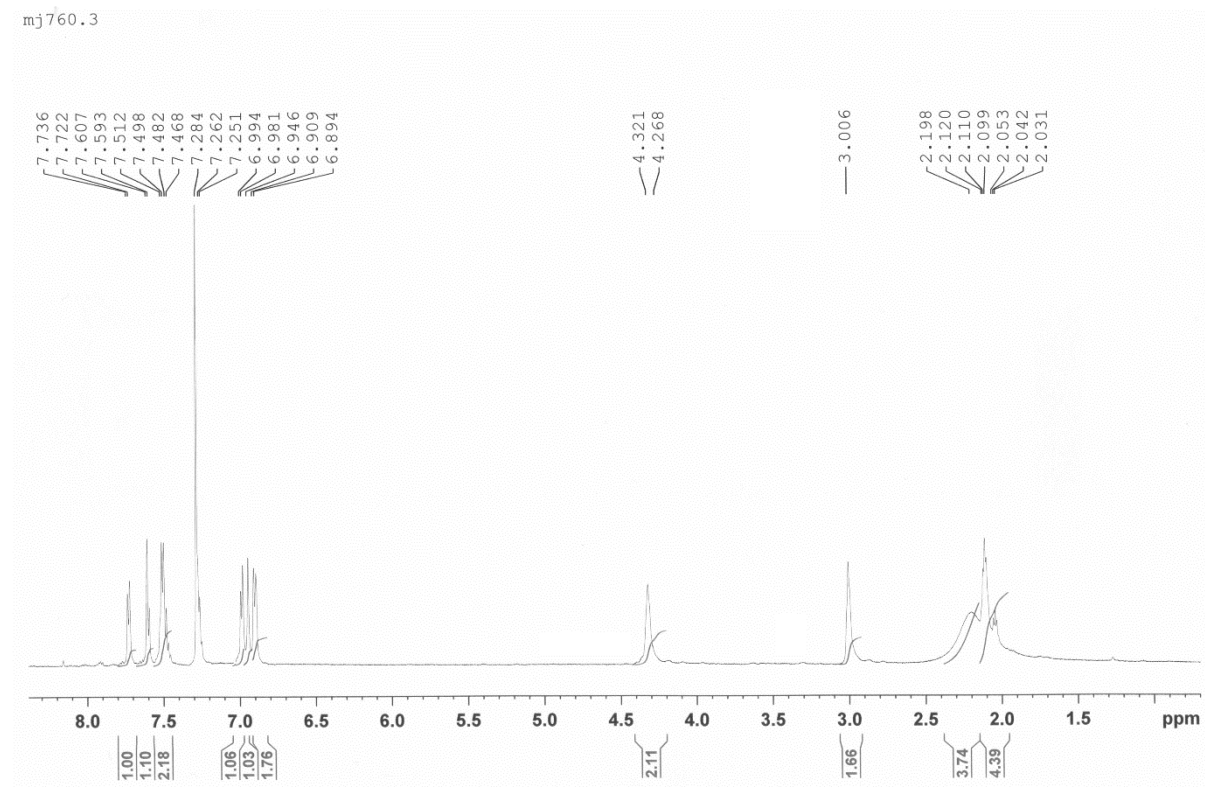

**Acquisition Parameter**

|             |          |                      |          |                  |           |
|-------------|----------|----------------------|----------|------------------|-----------|
| Source Type | ESI      | Ion Polarity         | Positive | Set Nebulizer    | 0.3 Bar   |
| Focus       | Active   | Set Capillary        | 4000 V   | Set Dry Heater   | 200 °C    |
| Scan Begin  | 100 m/z  | Set End Plate Offset | -500 V   | Set Dry Gas      | 3.0 l/min |
| Scan End    | 1000 m/z | Set Charging Voltage | 2000 V   | Set Divert Valve | Source    |
|             |          | Set Corona           | 0 nA     | Set APCI Heater  | 0 °C      |

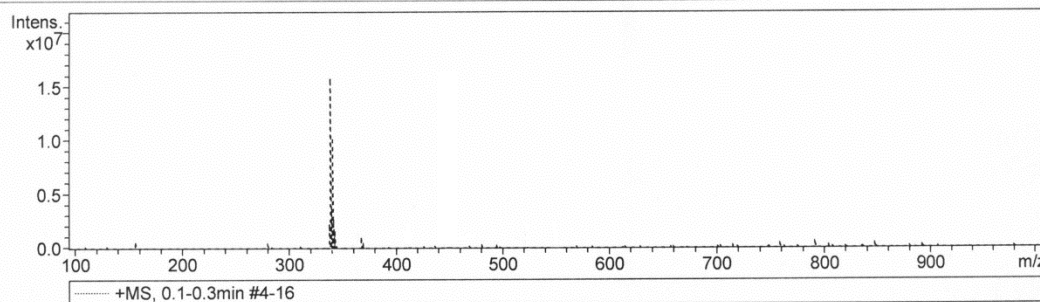

| # | m/z      | Res.  | S/N   | I      | I %   | FWHM   |
|---|----------|-------|-------|--------|-------|--------|
| 1 | 342.0844 | 23653 | 278.3 | 110821 | 100.0 | 0.0145 |

10. NMR spectra and HR MS of N-(3-(8-chloroquino[3,2-b]benzo[1,4]thiazin-6-yl)propyl)acetamide (**16**).

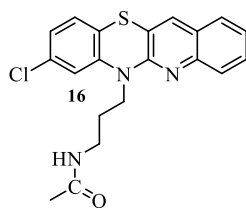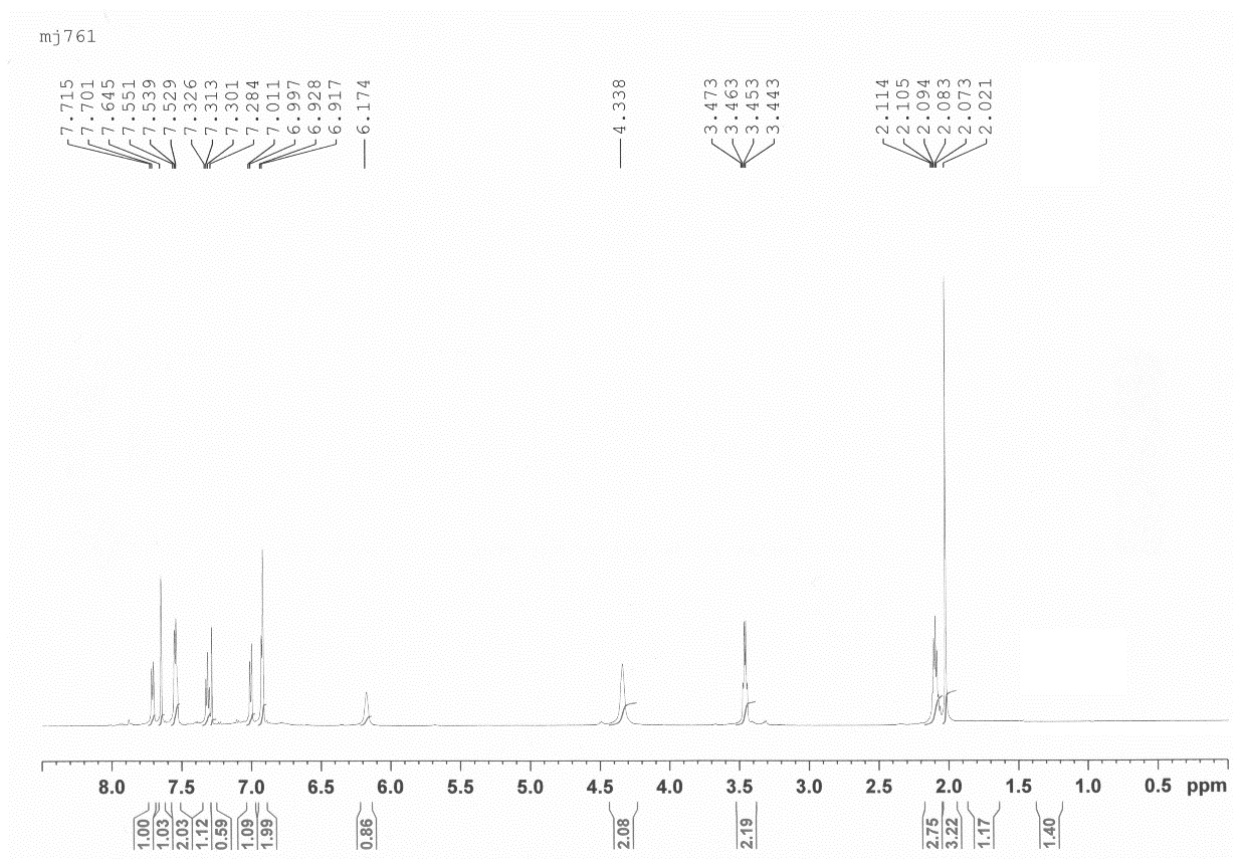

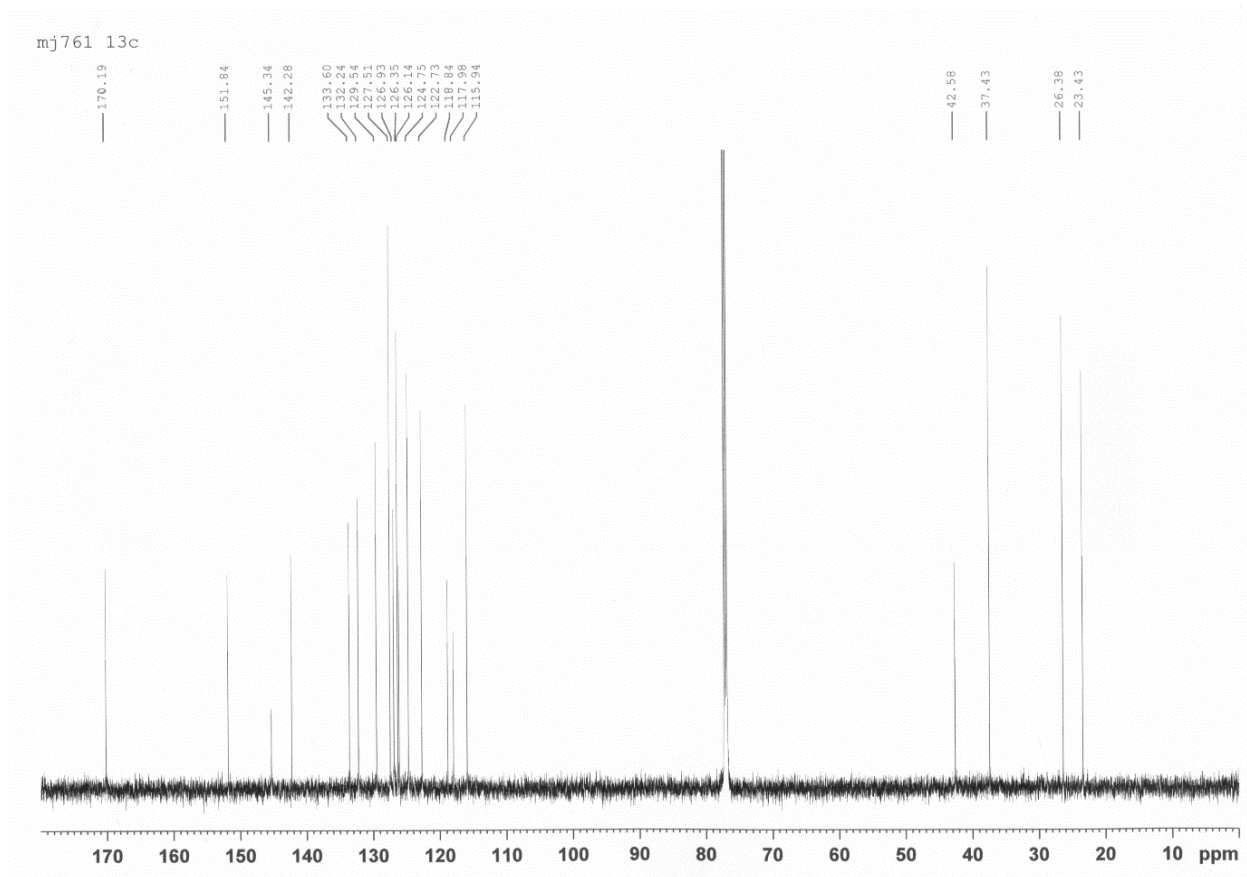

#### Acquisition Parameter

|             |         |                      |          |                  |           |
|-------------|---------|----------------------|----------|------------------|-----------|
| Source Type | ESI     | Ion Polarity         | Positive | Set Nebulizer    | 0.3 Bar   |
| Focus       | Active  | Set Capillary        | 4000 V   | Set Dry Heater   | 240 °C    |
| Scan Begin  | 100 m/z | Set End Plate Offset | -500 V   | Set Dry Gas      | 4.0 l/min |
| Scan End    | 500 m/z | Set Charging Voltage | 2000 V   | Set Divert Valve | Source    |
|             |         | Set Corona           | 0 nA     | Set APCI Heater  | 0 °C      |

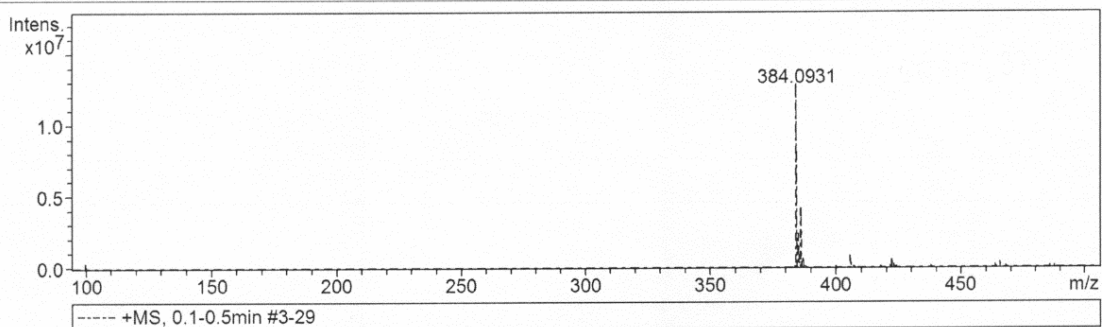

| # | m/z      | Res.  | S/N     | I        | I %   | FWHM   |
|---|----------|-------|---------|----------|-------|--------|
| 1 | 384.0931 | 38530 | 80379.1 | 12531551 | 100.0 | 0.0100 |
| 2 | 386.0898 | 32092 | 27159.5 | 4284578  | 34.2  | 0.0120 |

11. NMR spectra and HR MS of ethyl(3-(8-chloro-quinol[3,2-b]benzo[1,4]thiazin-6-yl)propyl)carbamate (**18**).

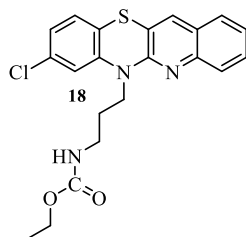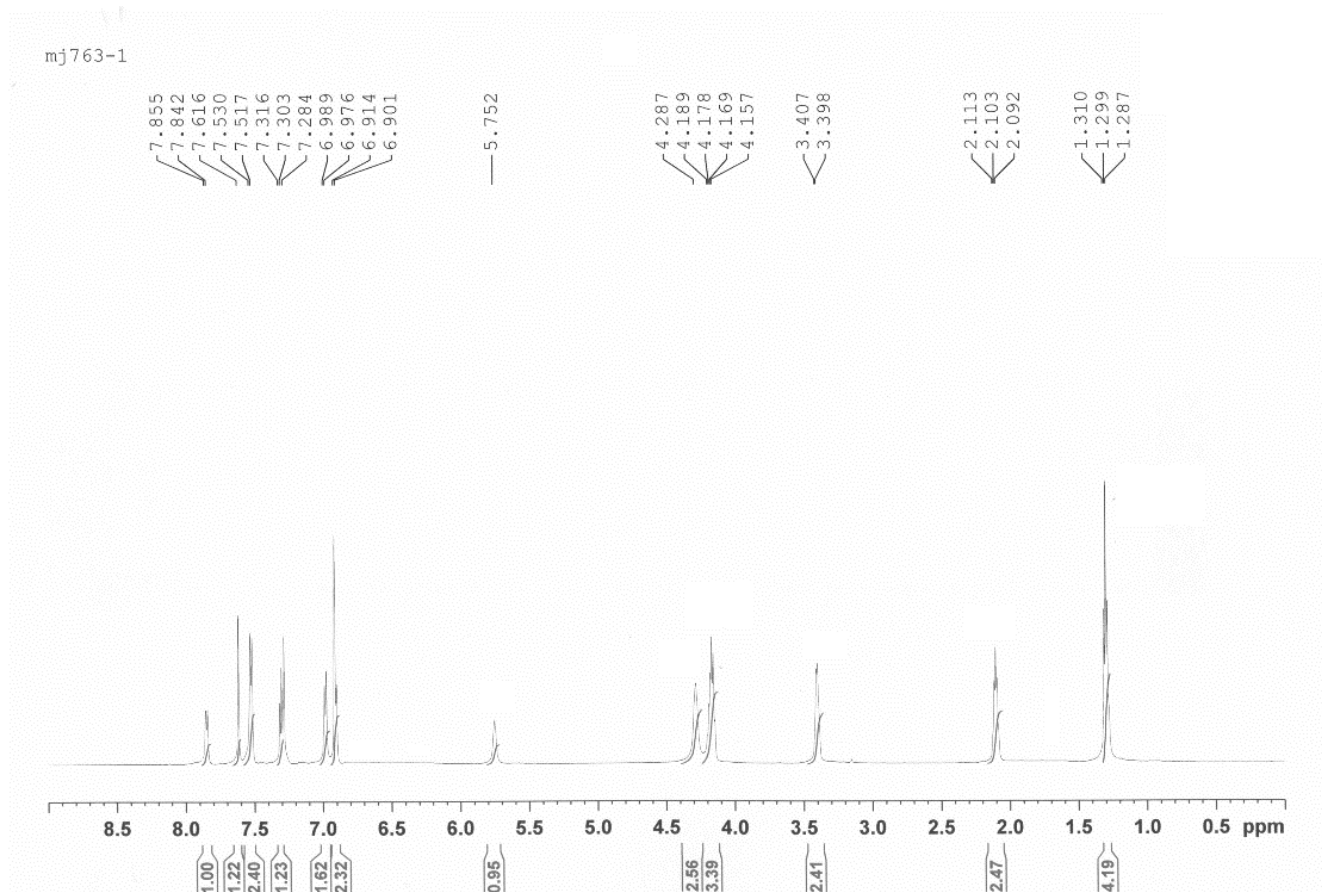

mj763-1 13c

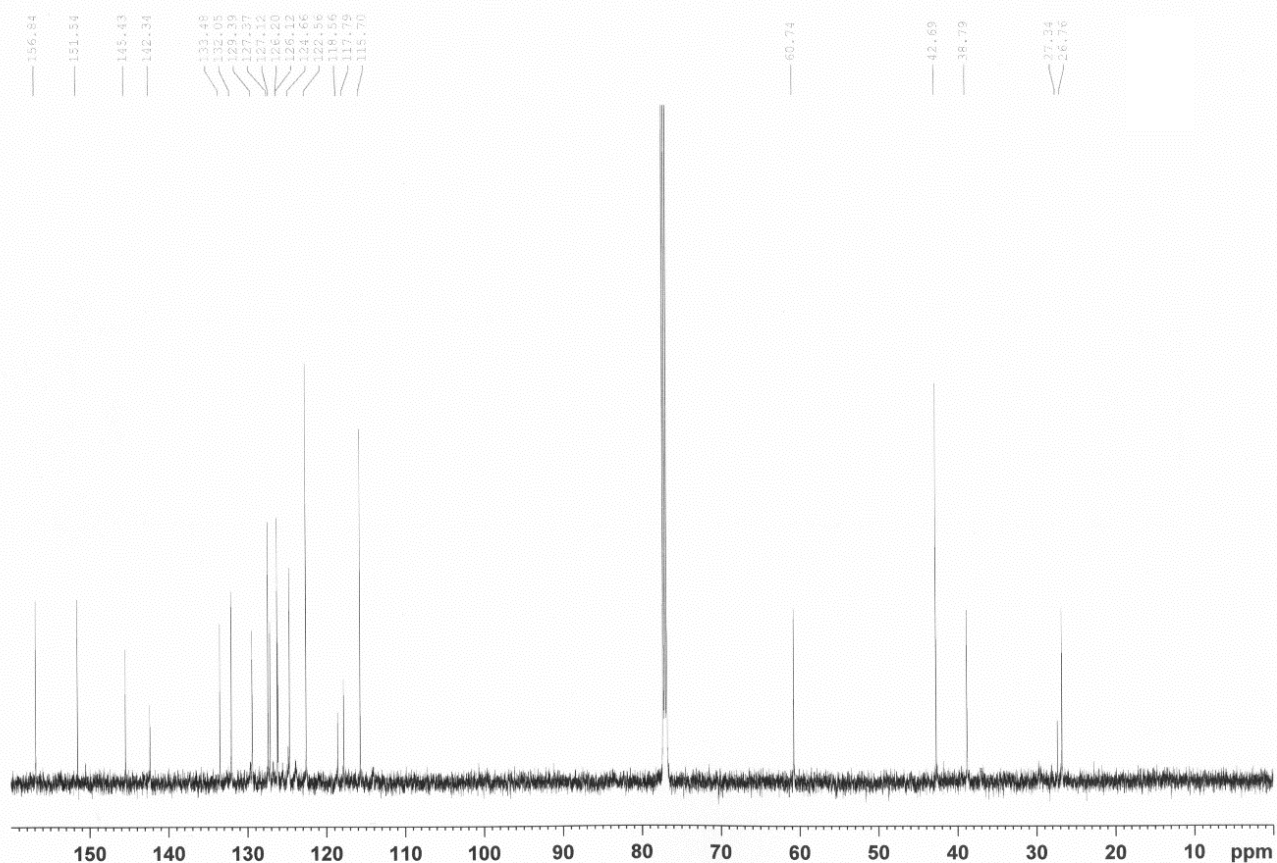

#### Acquisition Parameter

|             |         |                      |          |                  |           |
|-------------|---------|----------------------|----------|------------------|-----------|
| Source Type | ESI     | Ion Polarity         | Positive | Set Nebulizer    | 0.3 Bar   |
| Focus       | Active  | Set Capillary        | 4000 V   | Set Dry Heater   | 240 °C    |
| Scan Begin  | 100 m/z | Set End Plate Offset | -500 V   | Set Dry Gas      | 4.0 l/min |
| Scan End    | 500 m/z | Set Charging Voltage | 2000 V   | Set Divert Valve | Source    |
|             |         | Set Corona           | 0 nA     | Set APCI Heater  | 0 °C      |

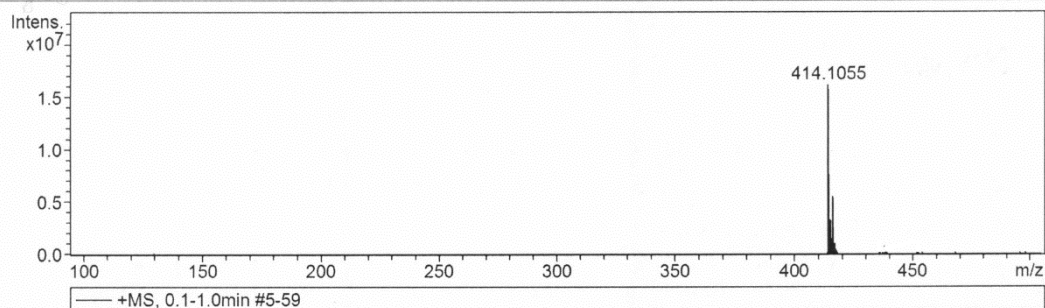

| # | m/z      | Res.  | S/N     | I        | I %   | FWHM   |
|---|----------|-------|---------|----------|-------|--------|
| 1 | 414.1055 | 34600 | 96812.6 | 16221700 | 100.0 | 0.0120 |
| 2 | 416.1021 | 33931 | 32773.3 | 5547655  | 34.2  | 0.0123 |

12. NMR spectra and HR MS of 1-(3-(8-chloroquino[3,2-b]benzo[1,4]thiazin-6-yl)propyl)-3-(2-chloroethyl)urea (**20**).

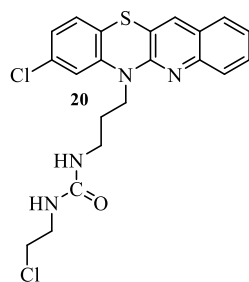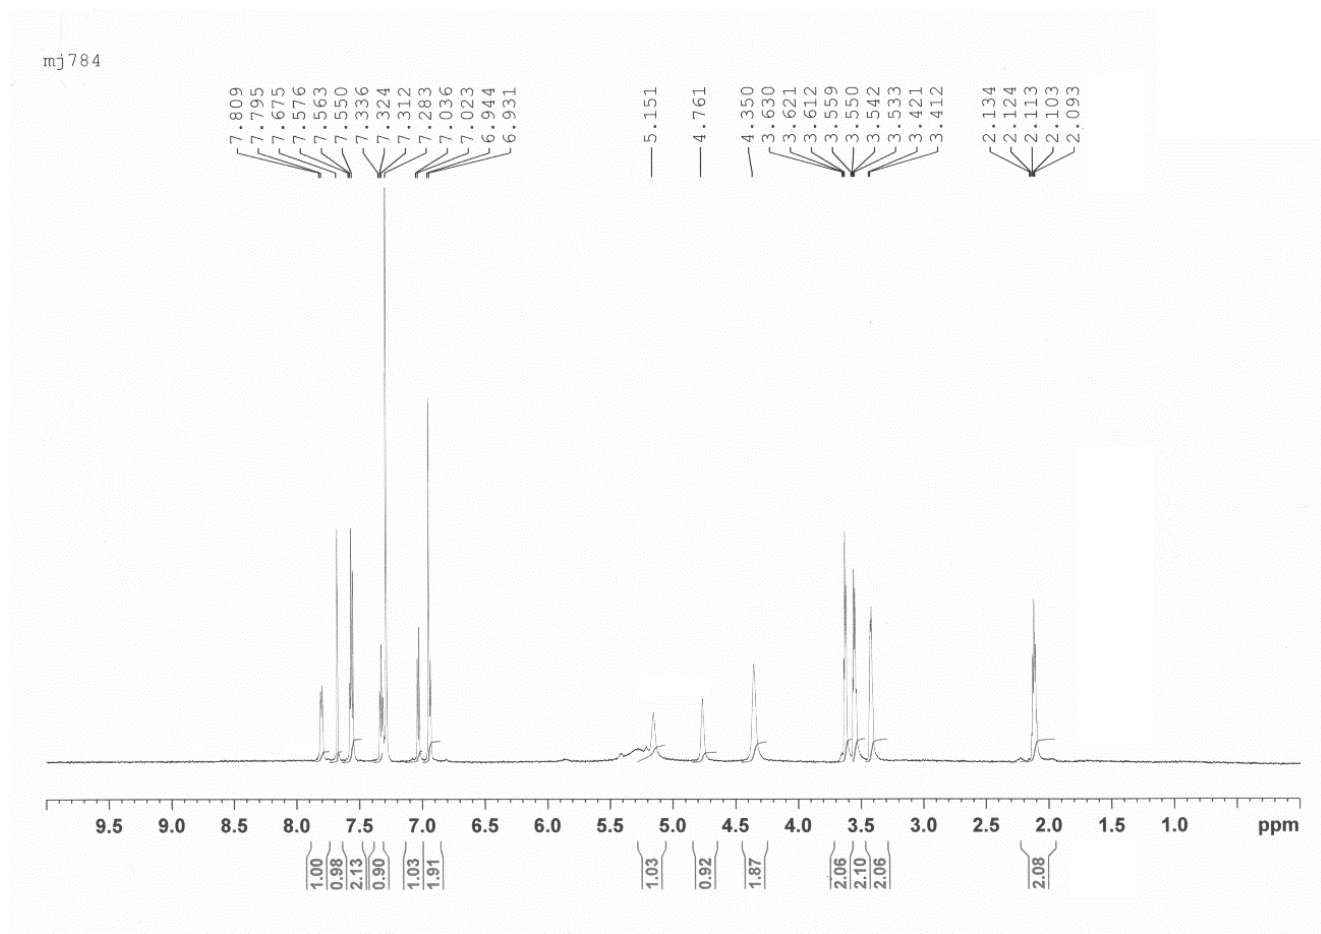

MJ784

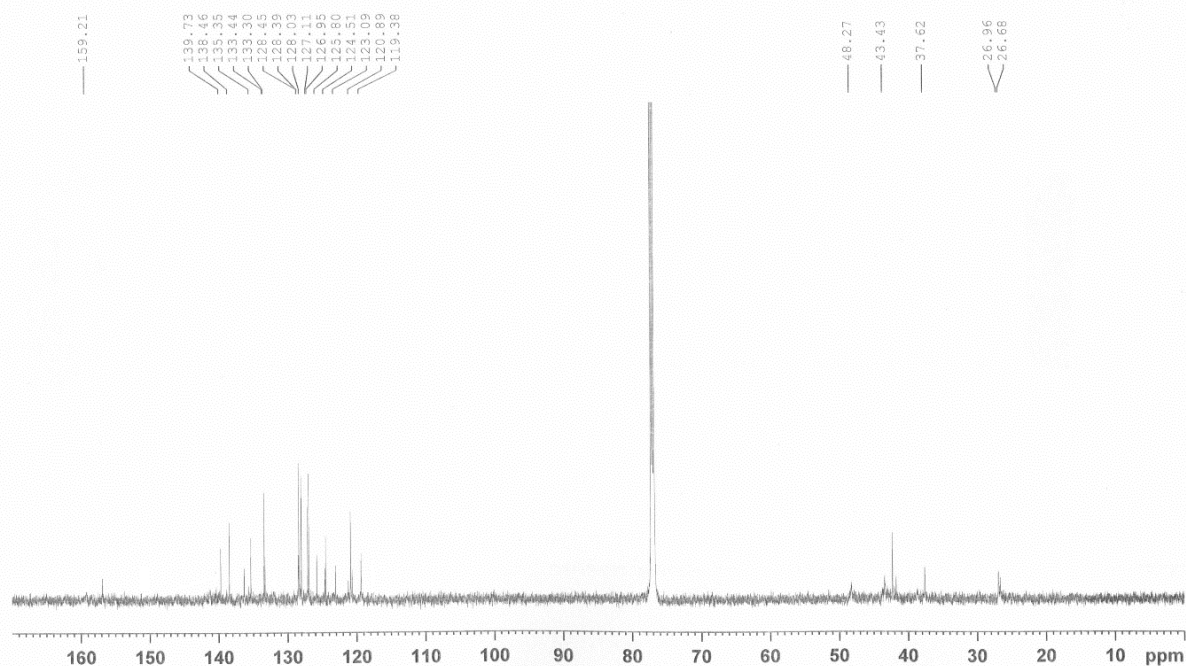

#### Acquisition Parameter

|             |          |                      |          |                  |           |
|-------------|----------|----------------------|----------|------------------|-----------|
| Source Type | ESI      | Ion Polarity         | Positive | Set Nebulizer    | 0.3 Bar   |
| Focus       | Active   | Set Capillary        | 4000 V   | Set Dry Heater   | 200 °C    |
| Scan Begin  | 100 m/z  | Set End Plate Offset | -500 V   | Set Dry Gas      | 3.0 l/min |
| Scan End    | 1000 m/z | Set Charging Voltage | 2000 V   | Set Divert Valve | Source    |
|             |          | Set Corona           | 0 nA     | Set APCI Heater  | 0 °C      |

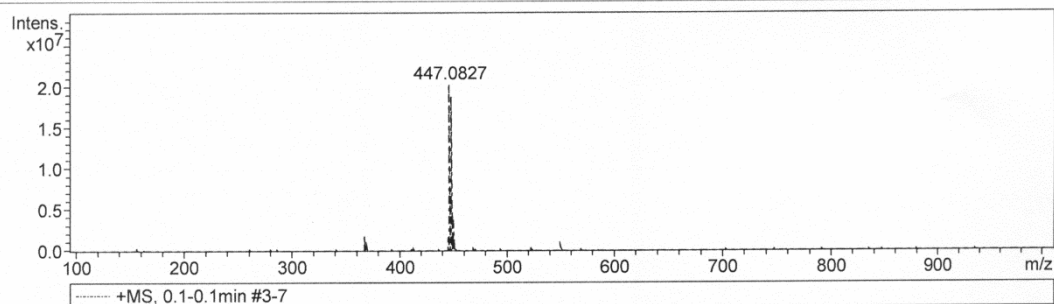

| # | m/z      | Res.  | S/N     | I        | I %   | FWHM   |
|---|----------|-------|---------|----------|-------|--------|
| 1 | 447.0827 | 22029 | 37433.2 | 20371780 | 100.0 | 0.0203 |
| 2 | 449.0793 | 39034 | 33448.2 | 18212446 | 89.4  | 0.0115 |



13. NMR spectra and HR MS of N-(3-(8-chloroquino[3,2-b]benzo[1,4]thiazin-6-yl)propyl)methanesulfonamide (**22**).

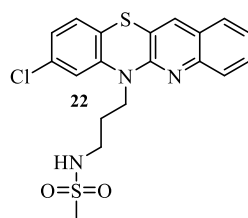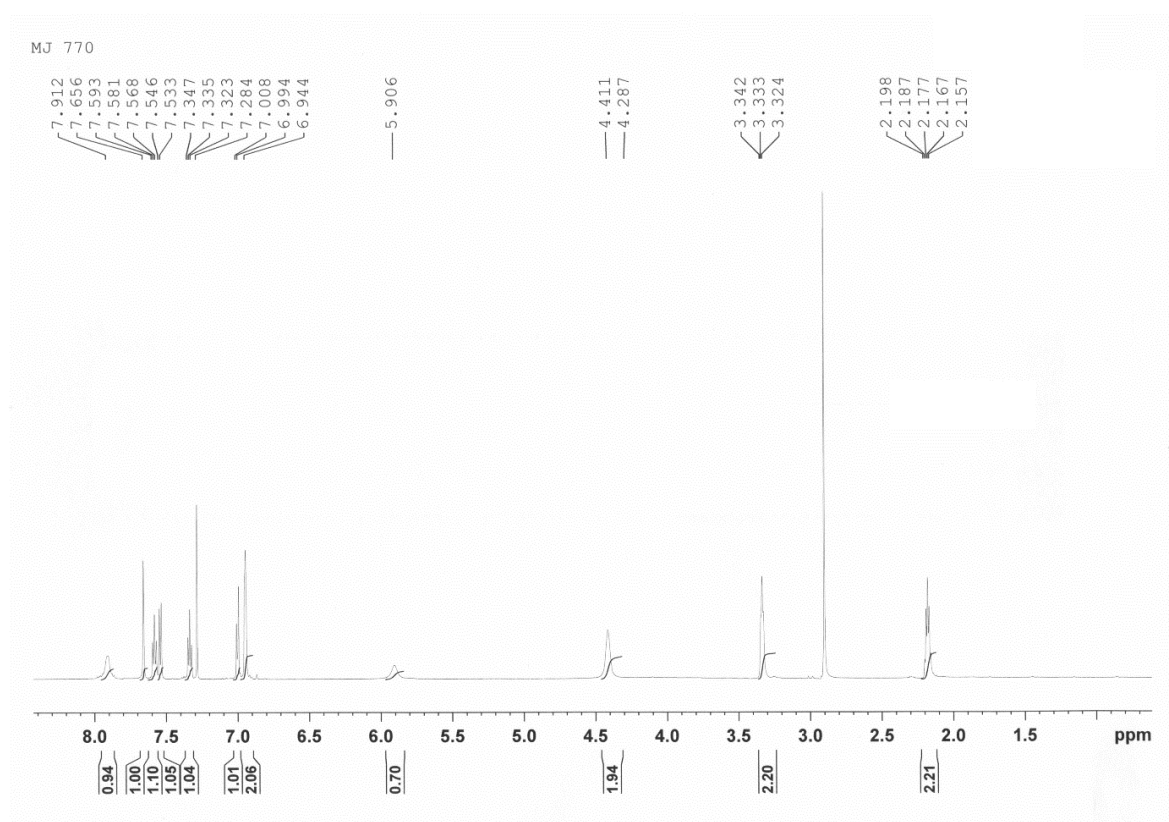



MJ770

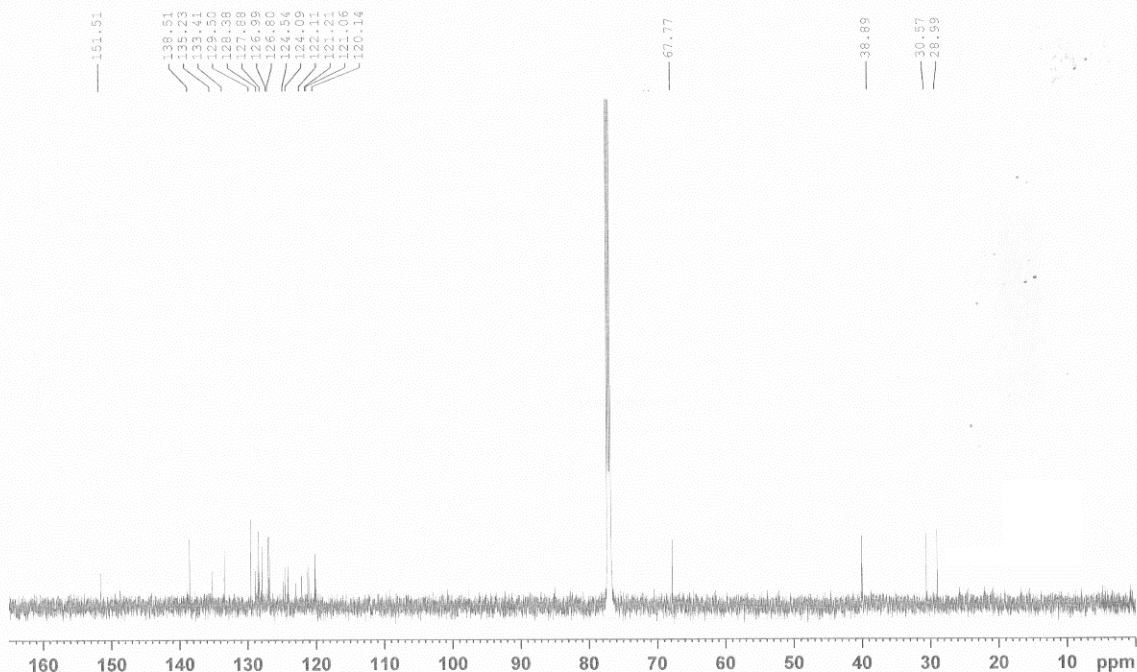

#### Acquisition Parameter

|             |         |                      |          |                  |           |
|-------------|---------|----------------------|----------|------------------|-----------|
| Source Type | ESI     | Ion Polarity         | Positive | Set Nebulizer    | 0.3 Bar   |
| Focus       | Active  | Set Capillary        | 4000 V   | Set Dry Heater   | 240 °C    |
| Scan Begin  | 100 m/z | Set End Plate Offset | -500 V   | Set Dry Gas      | 4.0 l/min |
| Scan End    | 500 m/z | Set Charging Voltage | 2000 V   | Set Divert Valve | Source    |
|             |         | Set Corona           | 0 nA     | Set APCI Heater  | 0 °C      |

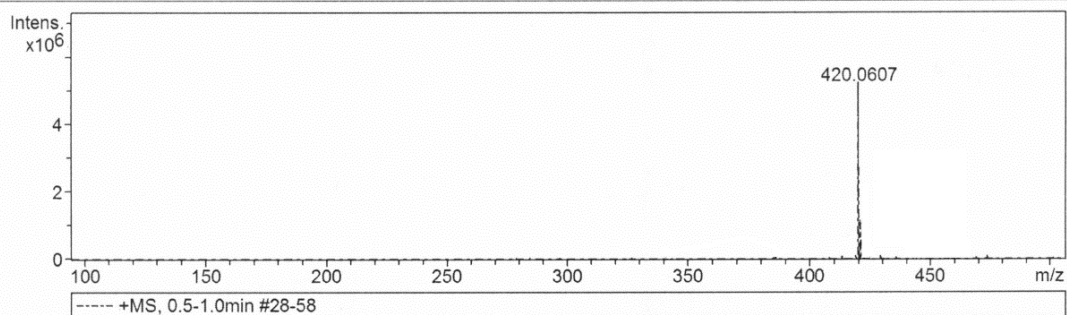

| # | m/z      | Res.  | S/N     | I       | I %   | FWHM   |
|---|----------|-------|---------|---------|-------|--------|
| 1 | 420.0607 | 34065 | 20988.5 | 5131382 | 100.0 | 0.0123 |
| 2 | 422.0575 | 26272 | 7957.4  | 1969690 | 38.4  | 0.0161 |

14. NMR spectra and HR MS of N-(3-(8-chloroquino[3,2-b]benzo[1,4]thiazin-6-yl)propyl)-4-methylbenzenesulfonamide (**24**).

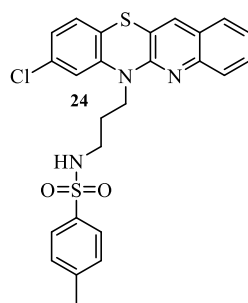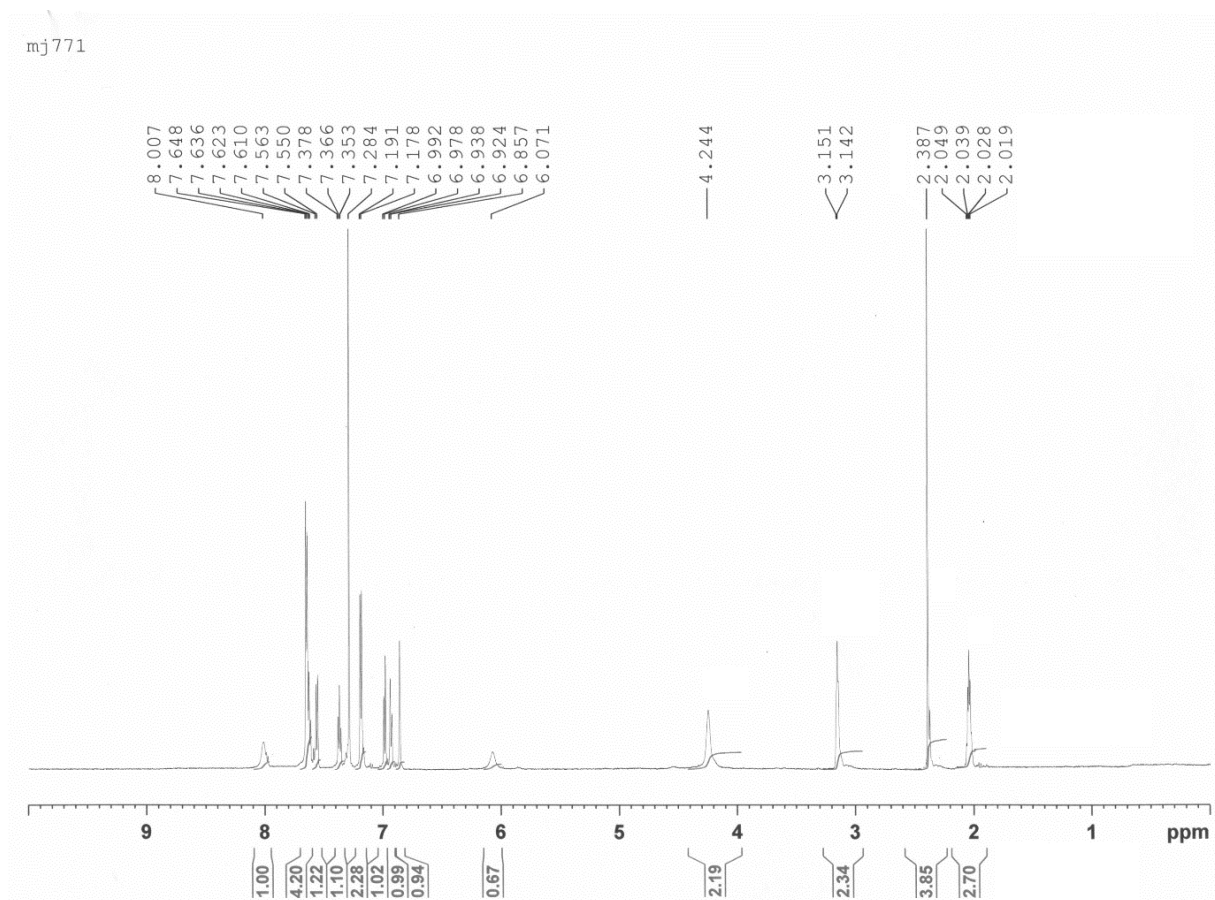

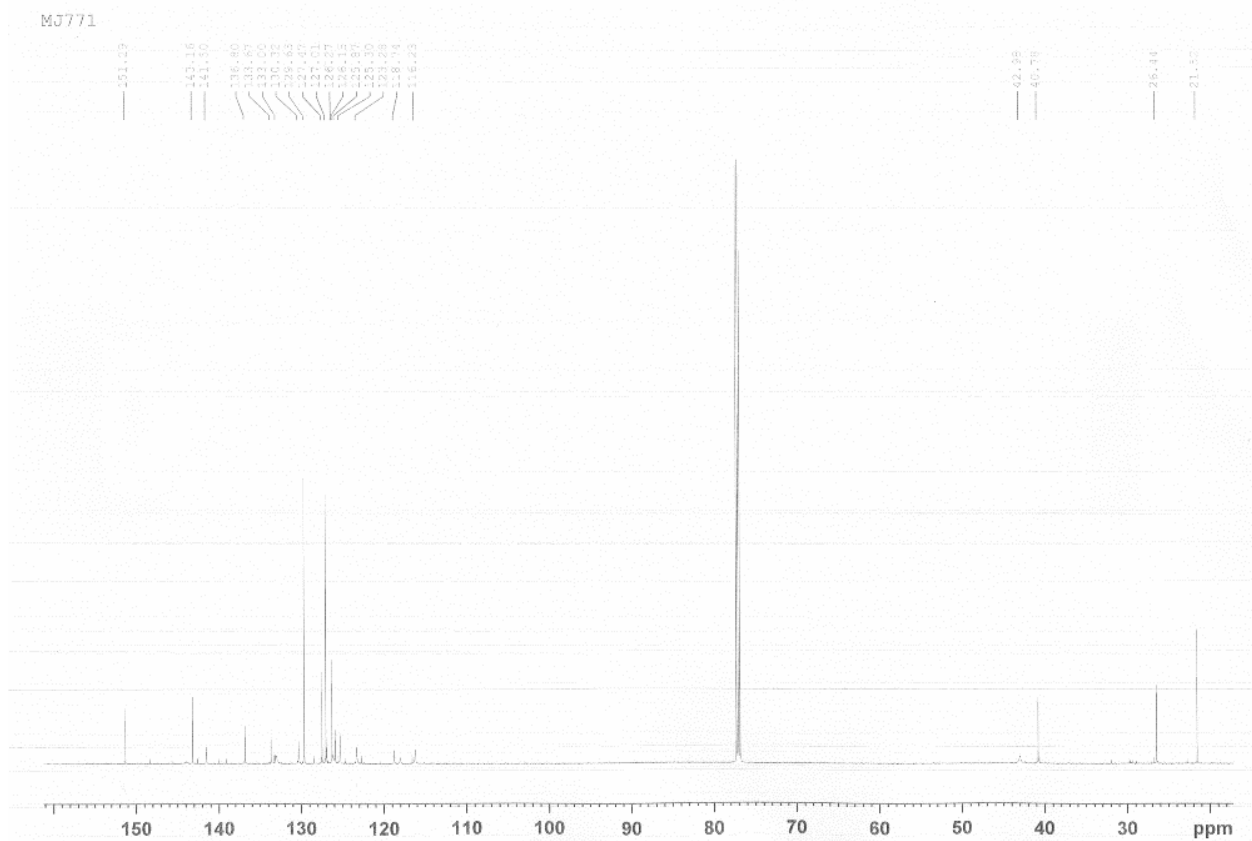

#### Acquisition Parameter

|             |         |                      |          |                  |           |
|-------------|---------|----------------------|----------|------------------|-----------|
| Source Type | ESI     | Ion Polarity         | Positive | Set Nebulizer    | 0.3 Bar   |
| Focus       | Active  | Set Capillary        | 4000 V   | Set Dry Heater   | 240 °C    |
| Scan Begin  | 100 m/z | Set End Plate Offset | -500 V   | Set Dry Gas      | 4.0 l/min |
| Scan End    | 500 m/z | Set Charging Voltage | 2000 V   | Set Divert Valve | Source    |
|             |         | Set Corona           | 0 nA     | Set APCI Heater  | 0 °C      |

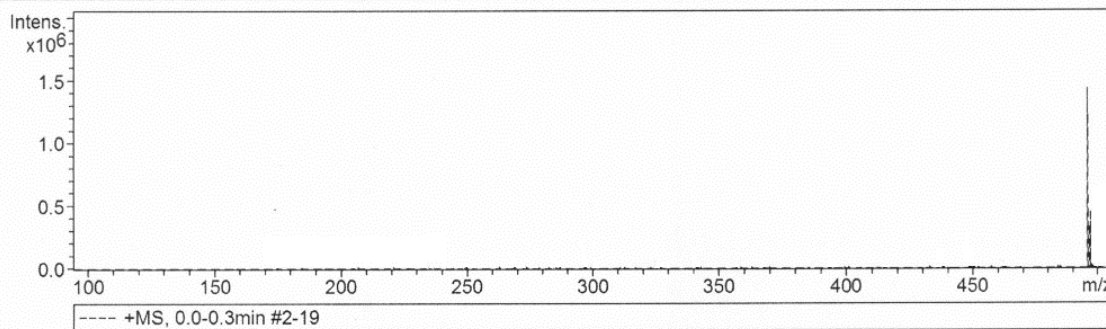

| # | m/z      | Res.  | S/N     | I       | I %   | FWHM   |
|---|----------|-------|---------|---------|-------|--------|
| 1 | 496.0924 | 25200 | 14496.2 | 1438795 | 100.0 | 0.0197 |
| 2 | 498.0897 | 19270 | 6287.3  | 624141  | 43.4  | 0.0258 |

15. NMR spectra and HR MS of 2-(4-(8-chloro quino[3,2-b]benzo[1,4]thiazin-6-yl)butyl)isoindoline-1,3-dione (**13**).

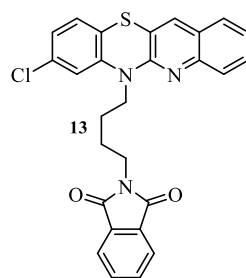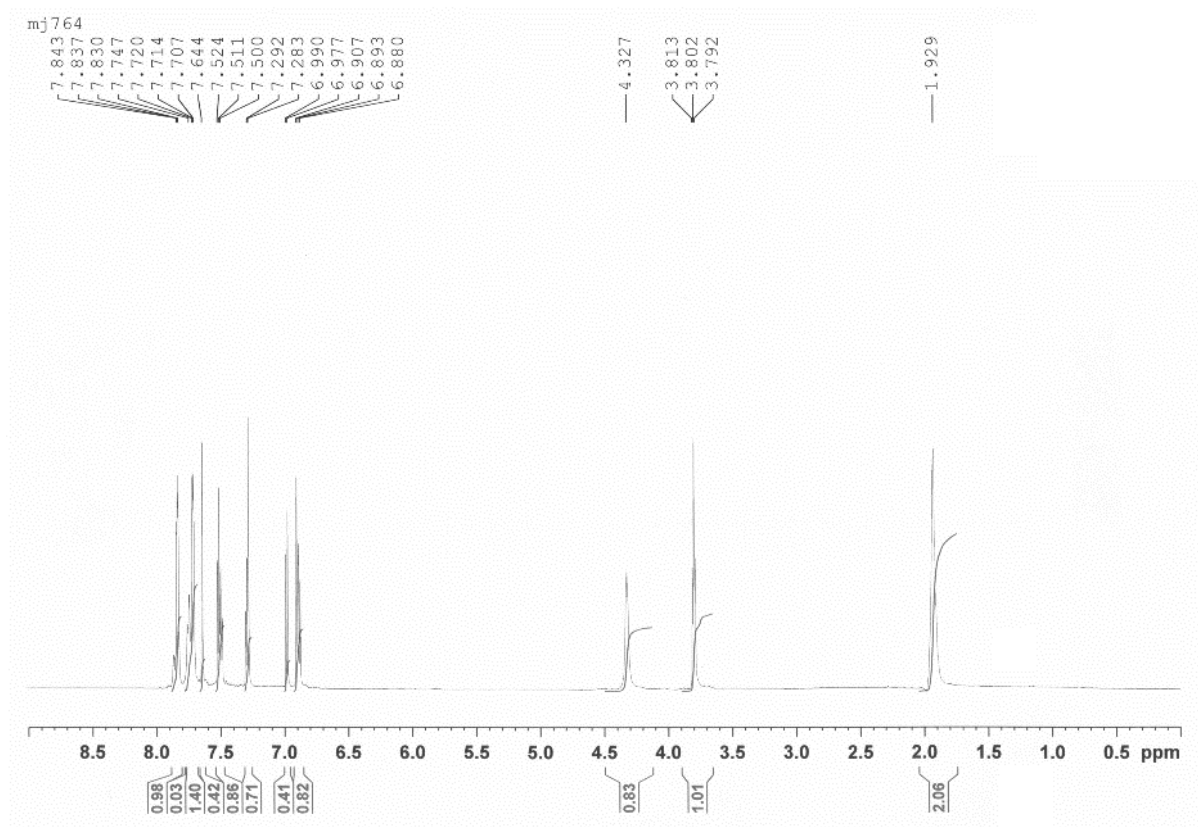

mj764 13c

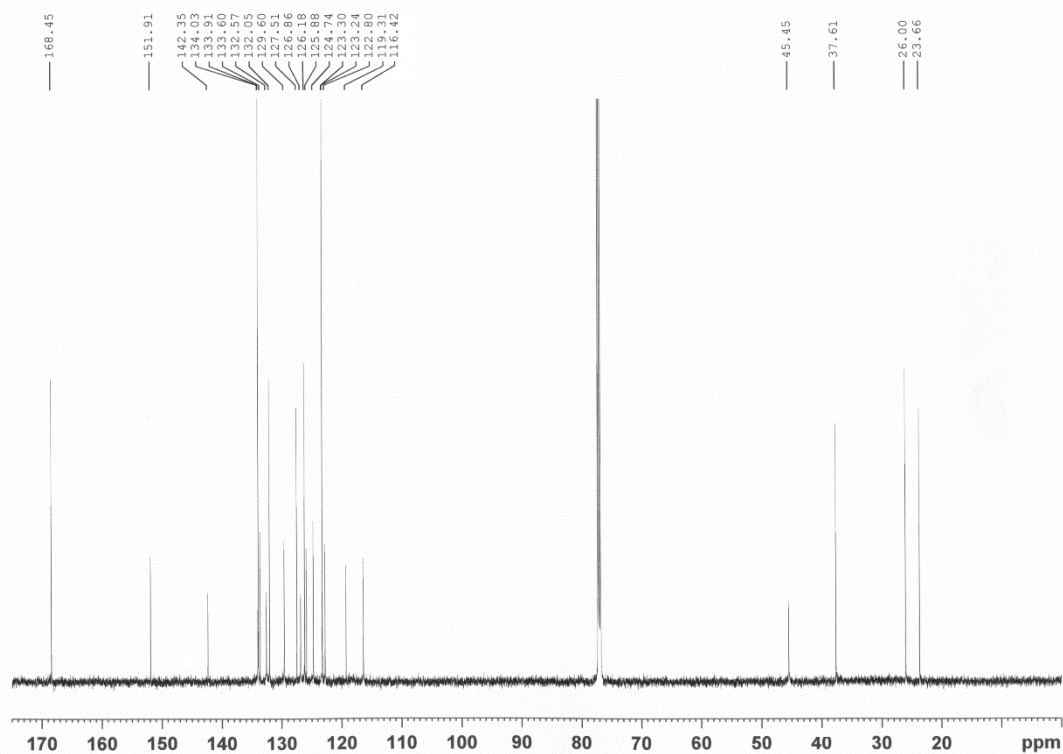

#### Acquisition Parameter

|             |          |                      |          |                  |           |
|-------------|----------|----------------------|----------|------------------|-----------|
| Source Type | ESI      | Ion Polarity         | Positive | Set Nebulizer    | 0.3 Bar   |
| Focus       | Active   | Set Capillary        | 4000 V   | Set Dry Heater   | 200 °C    |
| Scan Begin  | 100 m/z  | Set End Plate Offset | -500 V   | Set Dry Gas      | 3.0 l/min |
| Scan End    | 1000 m/z | Set Charging Voltage | 2000 V   | Set Divert Valve | Source    |
|             |          | Set Corona           | 0 nA     | Set APCI Heater  | 0 °C      |

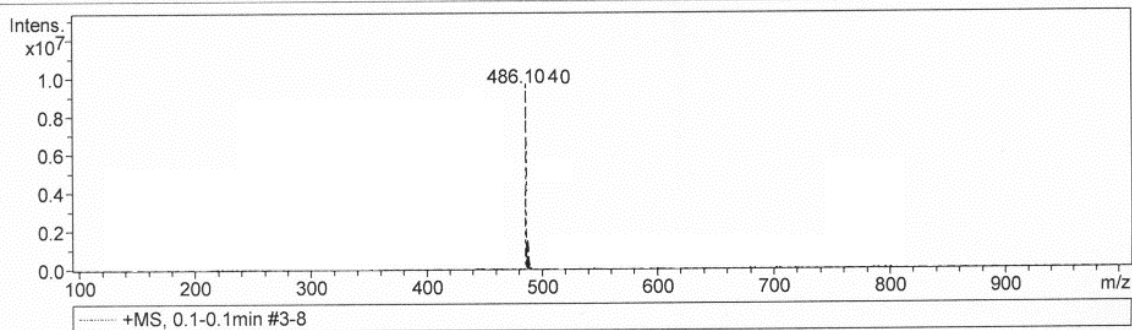

| # | m/z      | Res.  | S/N    | I       | I %   | FWHM   |
|---|----------|-------|--------|---------|-------|--------|
| 1 | 486.1040 | 41233 | 6045.6 | 4573534 | 100.0 | 0.0118 |

16. NMR spectra and HR MS of 4-(8-chloroquino[3,2-b]benzo[1,4]thiazin-6-yl)butan-1-amine (**15**).

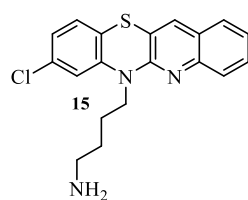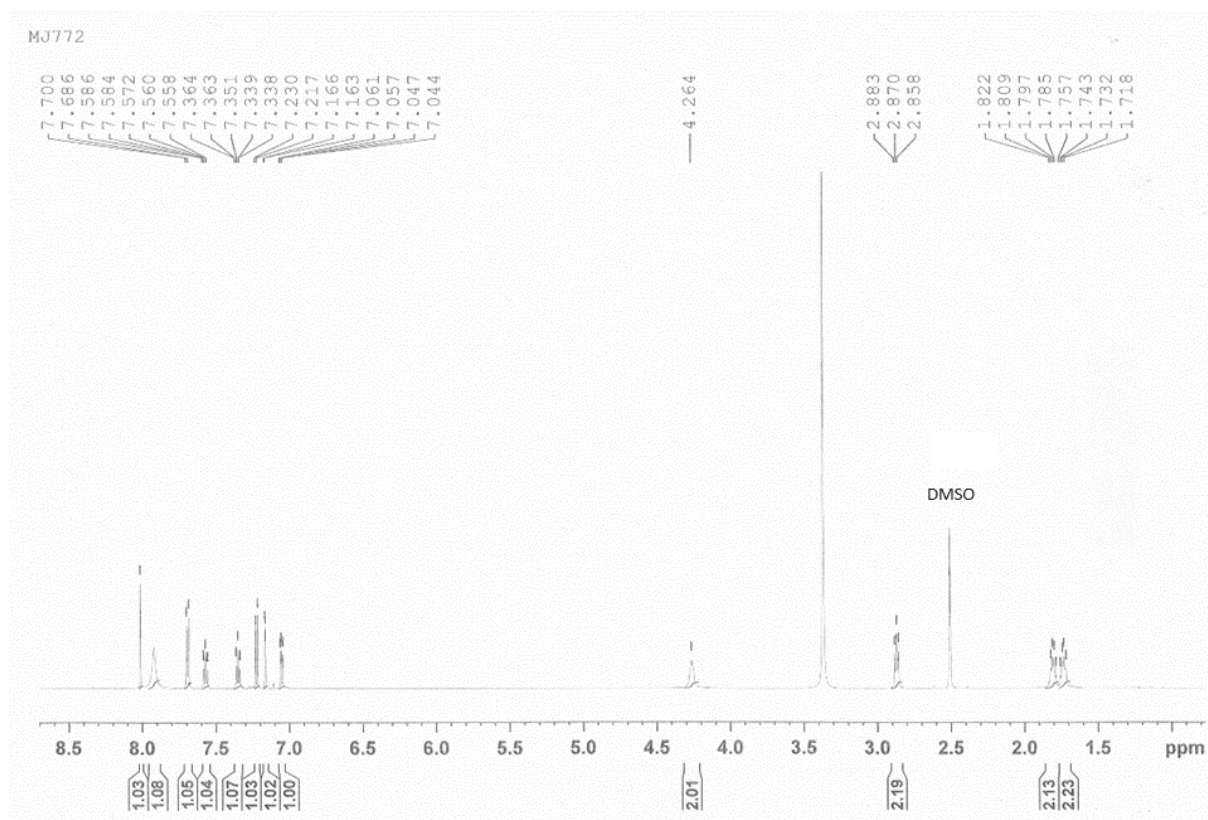

MJ772

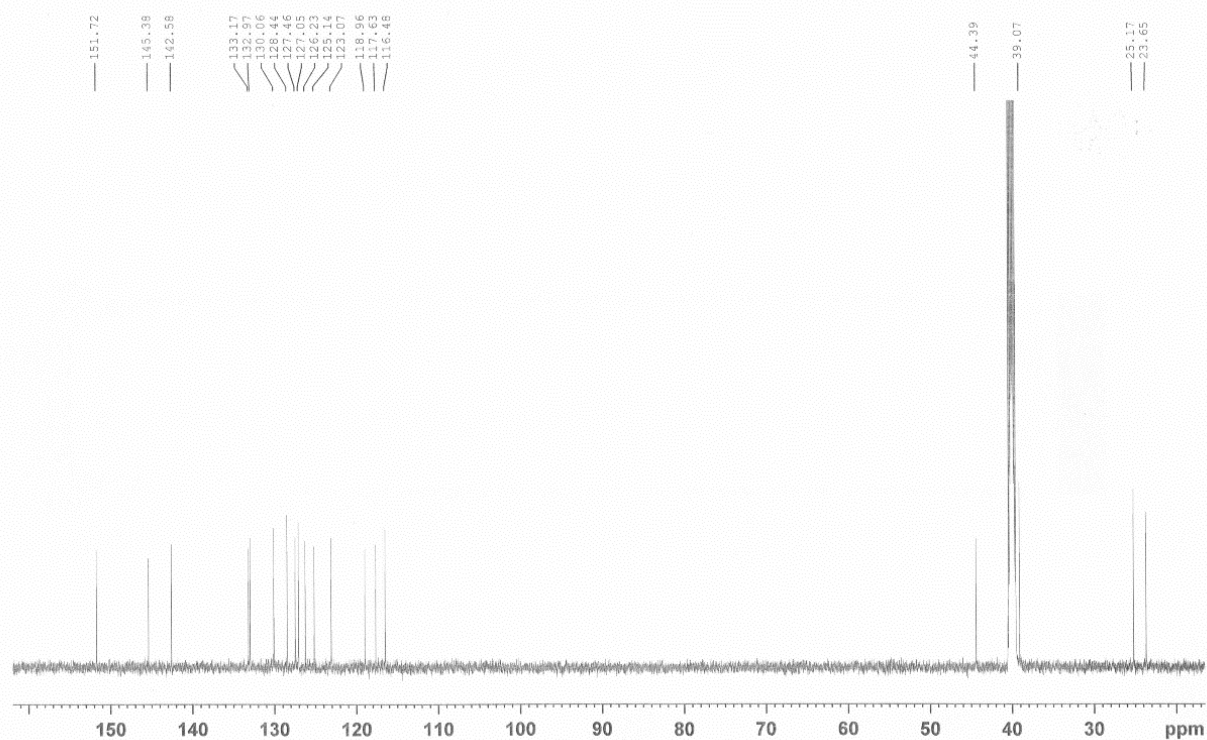

# Acquisition Parameter

|             |            |                      |          |                  |           |
|-------------|------------|----------------------|----------|------------------|-----------|
| Source Type | ESI        | Ion Polarity         | Positive | Set Nebulizer    | 0.3 Bar   |
| Focus       | Not active | Set Capillary        | 4000 V   | Set Dry Heater   | 200 °C    |
| Scan Begin  | 100 m/z    | Set End Plate Offset | -500 V   | Set Dry Gas      | 3.0 l/min |
| Scan End    | 1000 m/z   | Set Charging Voltage | 2000 V   | Set Divert Valve | Source    |
|             |            | Set Corona           | 0 nA     | Set APCI Heater  | 0 °C      |

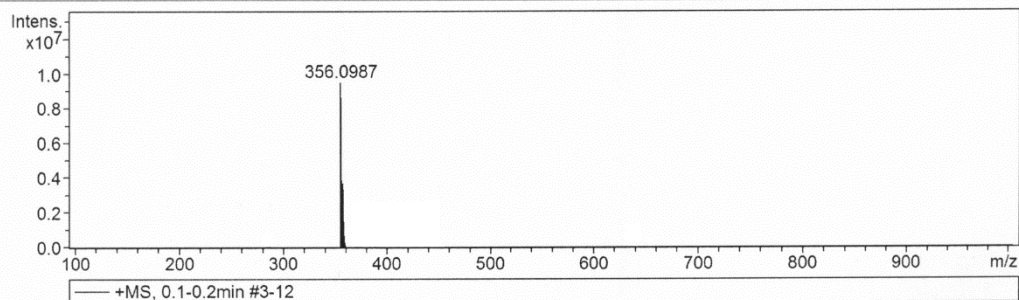

| # | m/z      | Res.  | S/N      | I       | I %   | FWHM   |
|---|----------|-------|----------|---------|-------|--------|
| 1 | 356.0987 | 12588 | 110224.2 | 9527740 | 100.0 | 0.0283 |
| 2 | 358.0954 | 13358 | 42185.6  | 3668580 | 38.5  | 0.0268 |



17. NMR spectra and HR MS of N-(4-(8-chloroquino[3,2-b]benzo[1,4]thiazin-6-yl)butyl)acetamide  
(17).

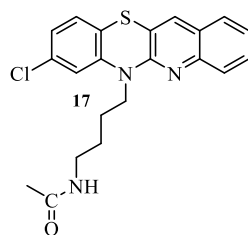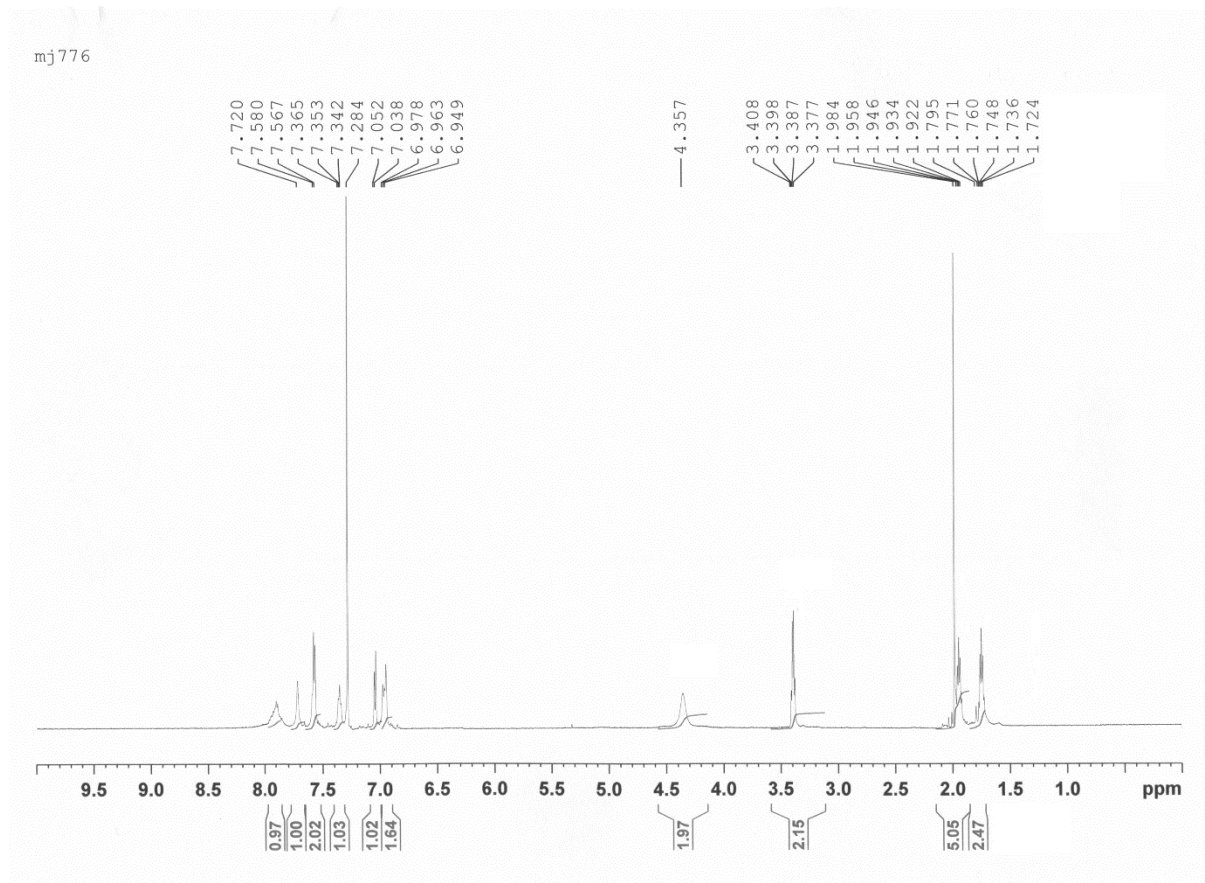



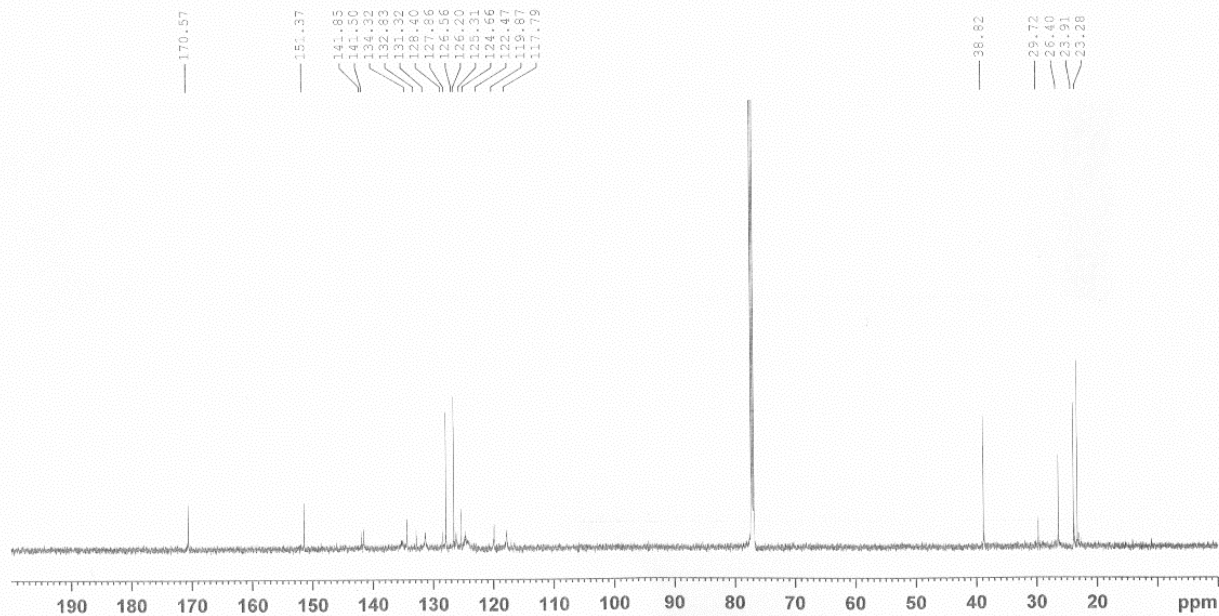

#### Acquisition Parameter

|             |            |                      |          |                  |           |
|-------------|------------|----------------------|----------|------------------|-----------|
| Source Type | ESI        | Ion Polarity         | Positive | Set Nebulizer    | 0.3 Bar   |
| Focus       | Not active | Set Capillary        | 4000 V   | Set Dry Heater   | 200 °C    |
| Scan Begin  | 100 m/z    | Set End Plate Offset | -500 V   | Set Dry Gas      | 3.0 l/min |
| Scan End    | 1000 m/z   | Set Charging Voltage | 2000 V   | Set Divert Valve | Source    |
|             |            | Set Corona           | 0 nA     | Set APCI Heater  | 0 °C      |

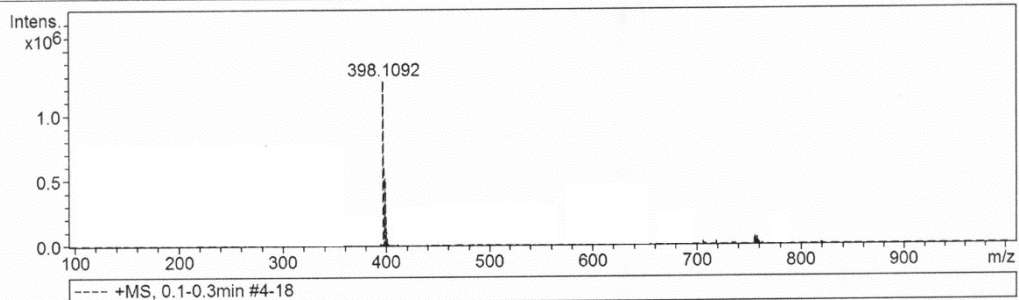

| # | m/z      | Res.  | S/N    | I       | I %   | FWHM   |
|---|----------|-------|--------|---------|-------|--------|
| 1 | 398.1092 | 13619 | 9225.4 | 1268062 | 100.0 | 0.0292 |
| 2 | 400.1063 | 13496 | 3545.4 | 490455  | 38.7  | 0.0296 |

18. NMR spectra and HR MS of ethyl(4-(8-chloro-quinol[3,2-b]benzo[1,4]thiazin-6-yl)butyl)carbamate (**19**).

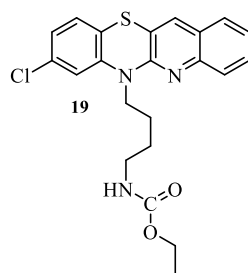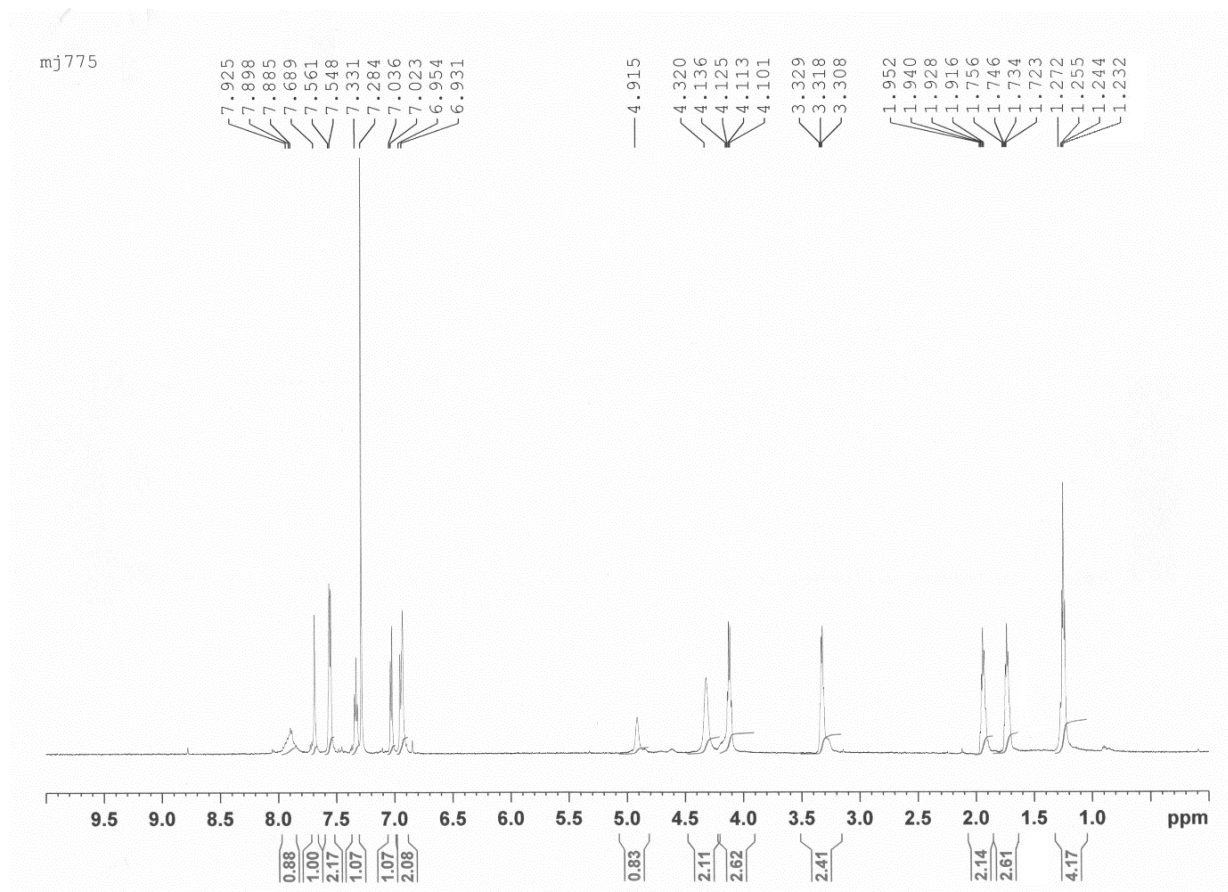

MJ775A

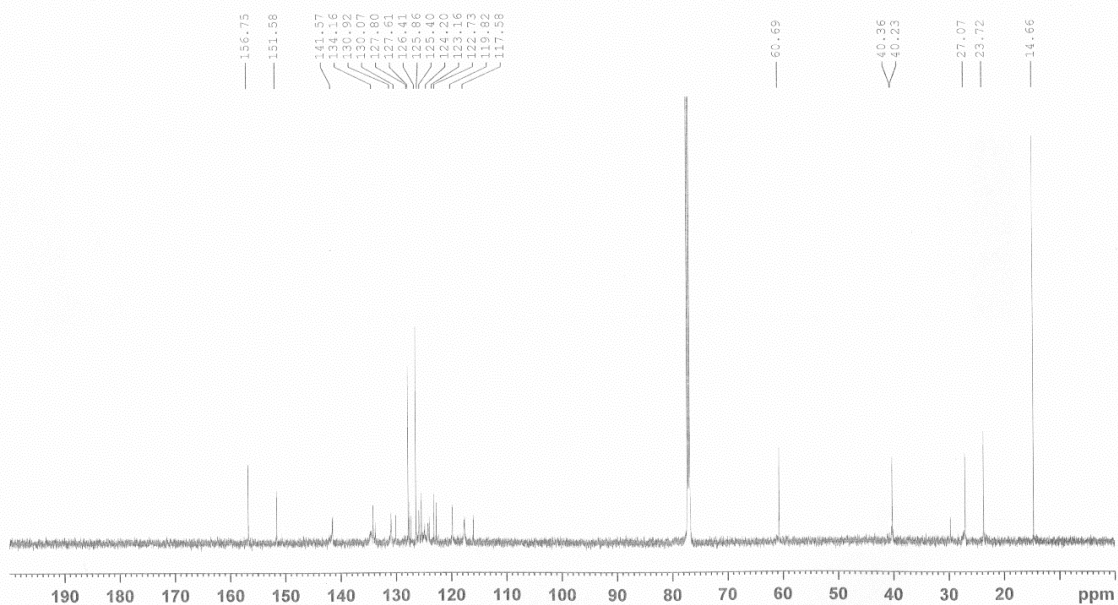

#### Acquisition Parameter

|             |            |                      |          |                  |           |
|-------------|------------|----------------------|----------|------------------|-----------|
| Source Type | ESI        | Ion Polarity         | Positive | Set Nebulizer    | 0.3 Bar   |
| Focus       | Not active | Set Capillary        | 4000 V   | Set Dry Heater   | 200 °C    |
| Scan Begin  | 100 m/z    | Set End Plate Offset | -500 V   | Set Dry Gas      | 3.0 l/min |
| Scan End    | 1000 m/z   | Set Charging Voltage | 2000 V   | Set Divert Valve | Source    |
|             |            | Set Corona           | 0 nA     | Set APCI Heater  | 0 °C      |

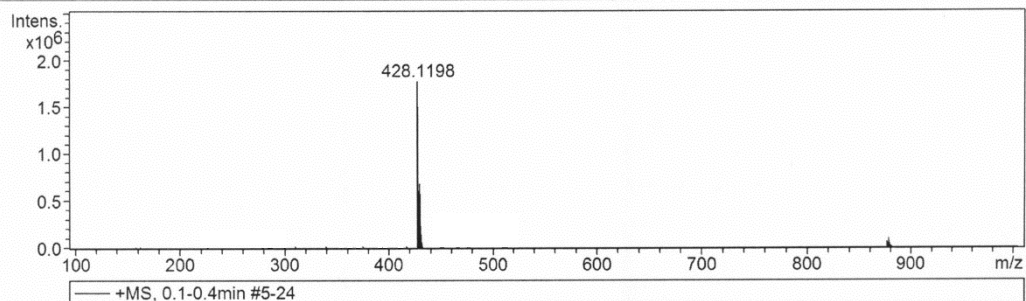

| # | m/z      | Res.  | S/N     | I       | I %   | FWHM   |
|---|----------|-------|---------|---------|-------|--------|
| 1 | 428.1198 | 13986 | 21640.4 | 1773247 | 100.0 | 0.0306 |
| 2 | 430.1171 | 13745 | 8352.5  | 686719  | 38.7  | 0.0313 |

19. NMR spectra and HR MS of 1-(4-(8-chloroquino[3,2-b]benzo[1,4]thiazin-6-yl)butyl)-3-(2-chloroethyl)urea (**21**).

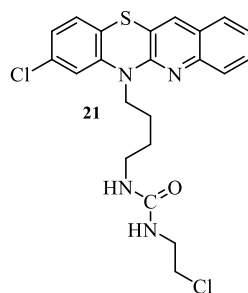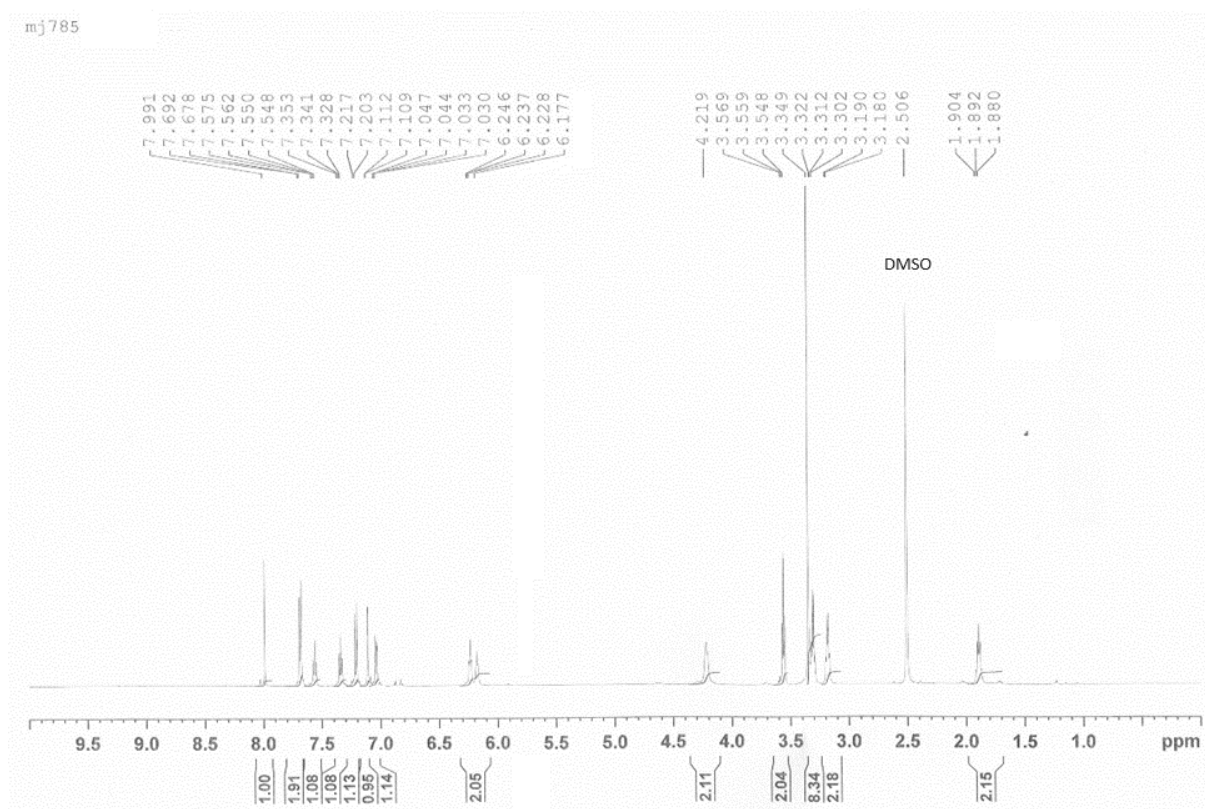

mj785c 13c

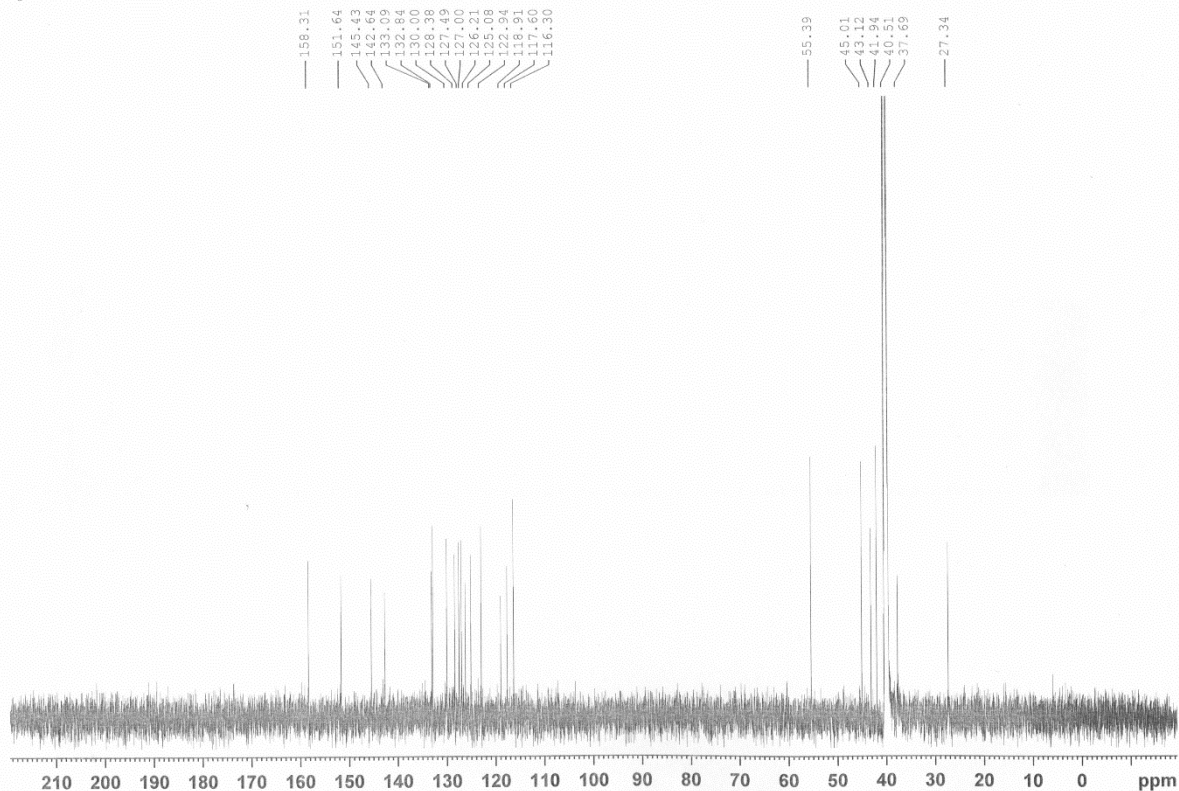

#### Acquisition Parameter

|             |          |                      |          |                  |           |
|-------------|----------|----------------------|----------|------------------|-----------|
| Source Type | ESI      | Ion Polarity         | Positive | Set Nebulizer    | 0.3 Bar   |
| Focus       | Active   | Set Capillary        | 4000 V   | Set Dry Heater   | 200 °C    |
| Scan Begin  | 100 m/z  | Set End Plate Offset | -500 V   | Set Dry Gas      | 3.0 l/min |
| Scan End    | 1000 m/z | Set Charging Voltage | 2000 V   | Set Divert Valve | Source    |
|             |          | Set Corona           | 0 nA     | Set APCI Heater  | 0 °C      |

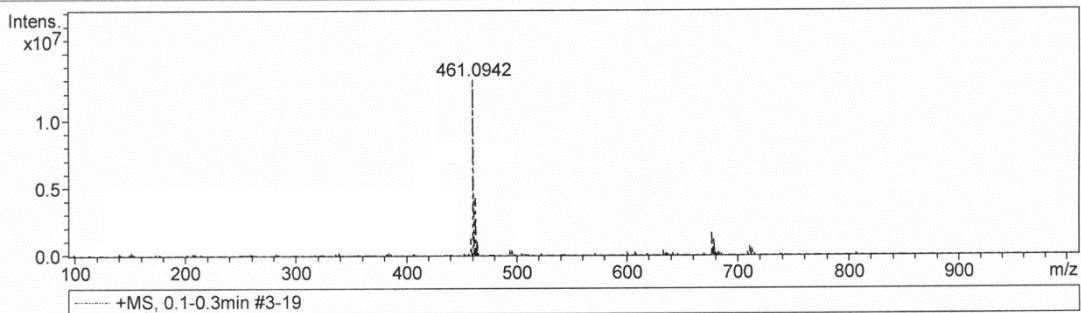

| # | m/z      | Res.  | S/N    | I       | I %   | FWHM   |
|---|----------|-------|--------|---------|-------|--------|
| 1 | 461.0942 | 43730 | 5526.7 | 6555349 | 100.0 | 0.0105 |
| 2 | 463.0719 | 41548 | 3633.5 | 4332482 | 66.1  | 0.0111 |

20. NMR spectra and HR MS of N-(4-(8-chloroquino[3,2-b]benzo[1,4]thiazin-6-yl)butyl)methanesulfonamide (**23**).

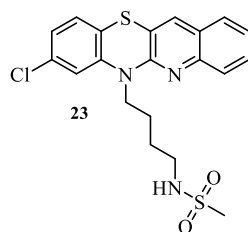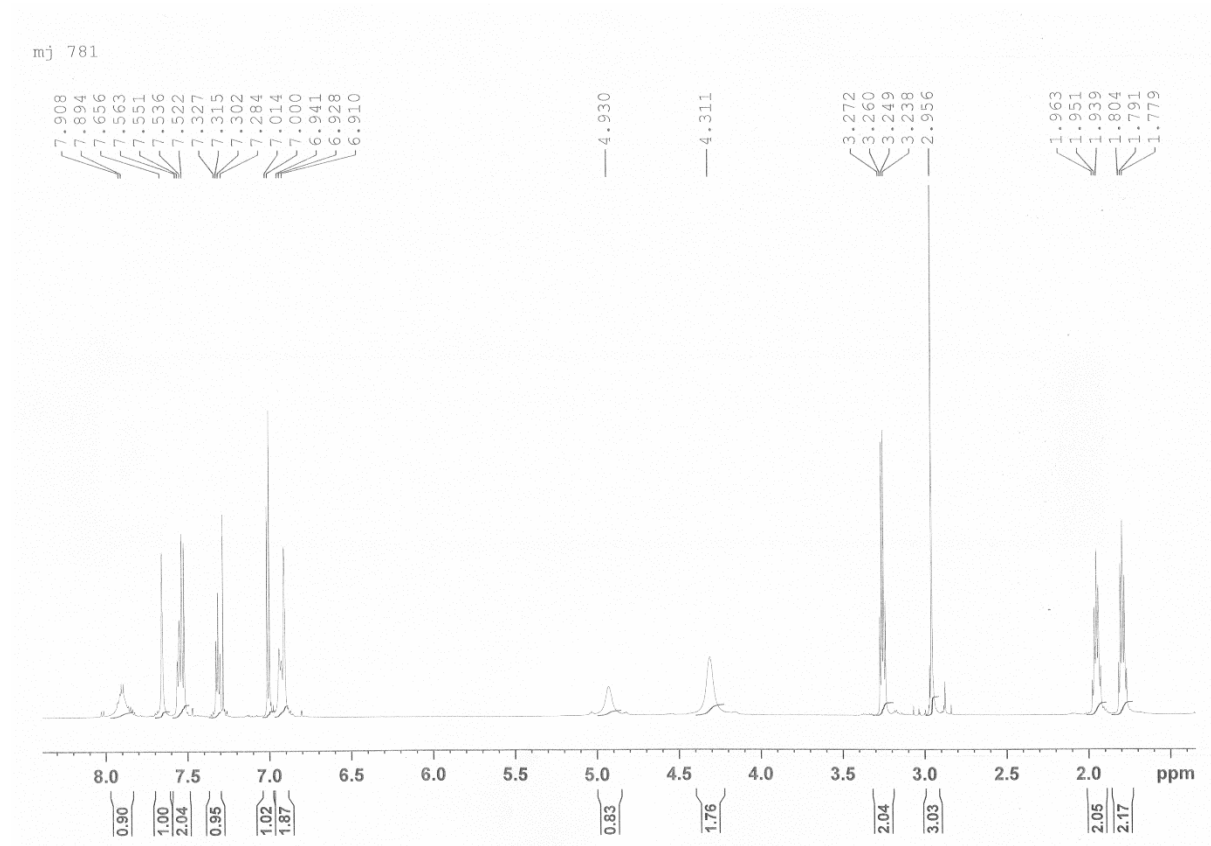

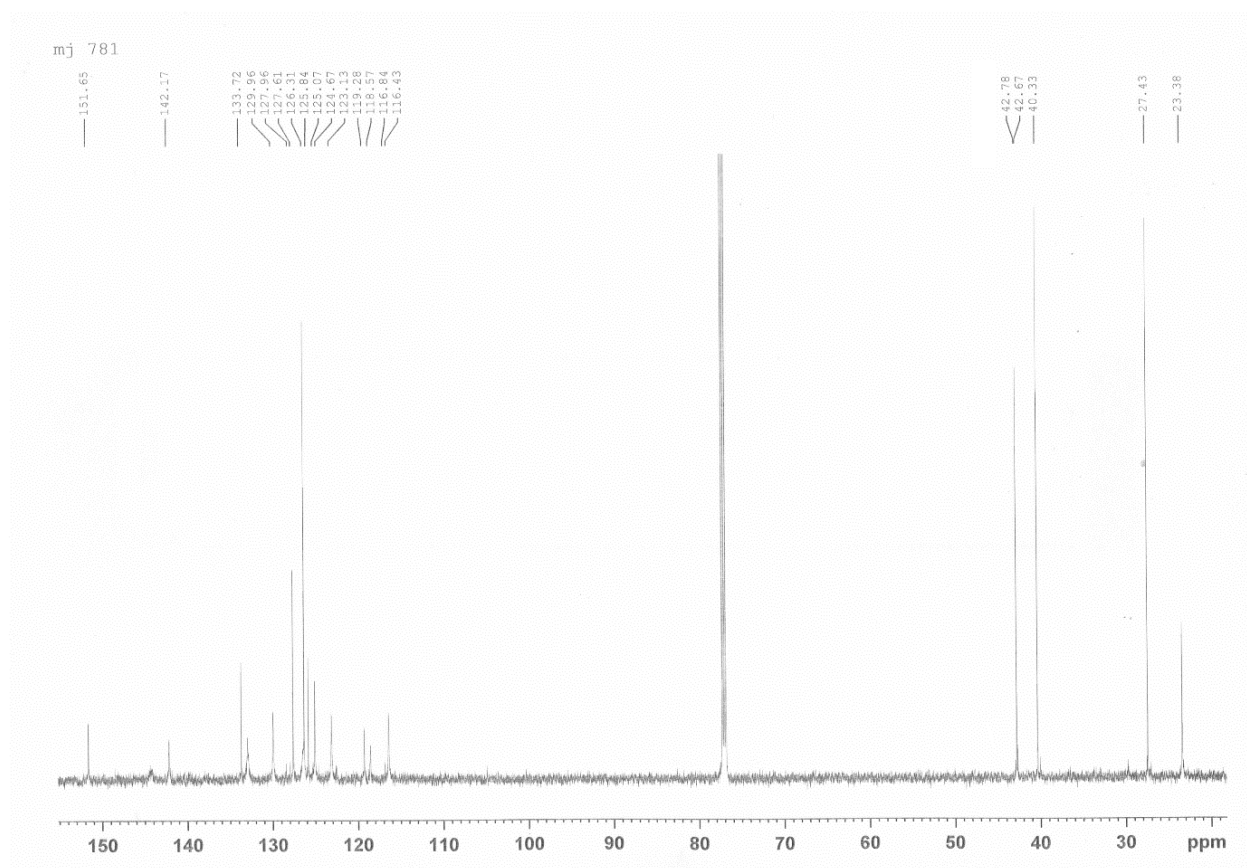

#### Acquisition Parameter

|             |            |                      |          |                  |           |
|-------------|------------|----------------------|----------|------------------|-----------|
| Source Type | ESI        | Ion Polarity         | Positive | Set Nebulizer    | 0.3 Bar   |
| Focus       | Not active | Set Capillary        | 4000 V   | Set Dry Heater   | 200 °C    |
| Scan Begin  | 100 m/z    | Set End Plate Offset | -500 V   | Set Dry Gas      | 3.0 l/min |
| Scan End    | 1000 m/z   | Set Charging Voltage | 2000 V   | Set Divert Valve | Source    |
|             |            | Set Corona           | 0 nA     | Set APCI Heater  | 0 °C      |

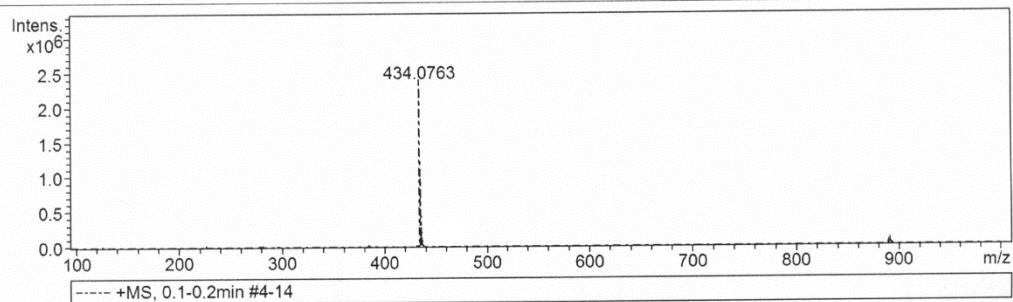

| # | m/z      | Res.  | S/N     | I       | I %   | FWHM   |
|---|----------|-------|---------|---------|-------|--------|
| 1 | 434.0763 | 13896 | 36384.3 | 2348999 | 100.0 | 0.0312 |
| 2 | 436.0732 | 13652 | 15313.9 | 993562  | 42.3  | 0.0319 |



21. NMR spectra and HR MS of N-(4-(8-chloroquino[3,2-b]benzo[1,4]thiazin-6-yl)butyl)-4-methylbenzenesulfonamide (**25**).

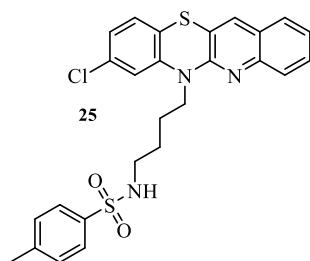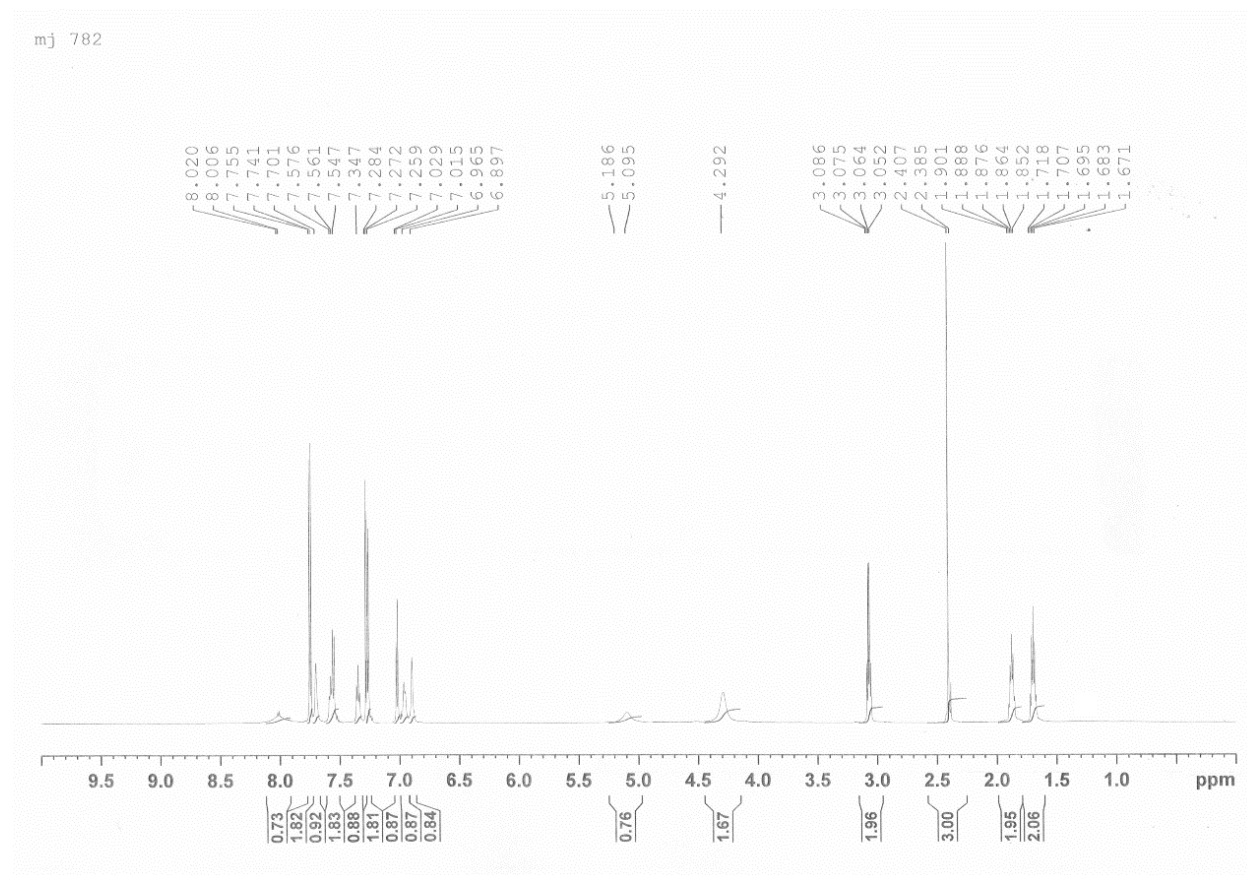

mj 782

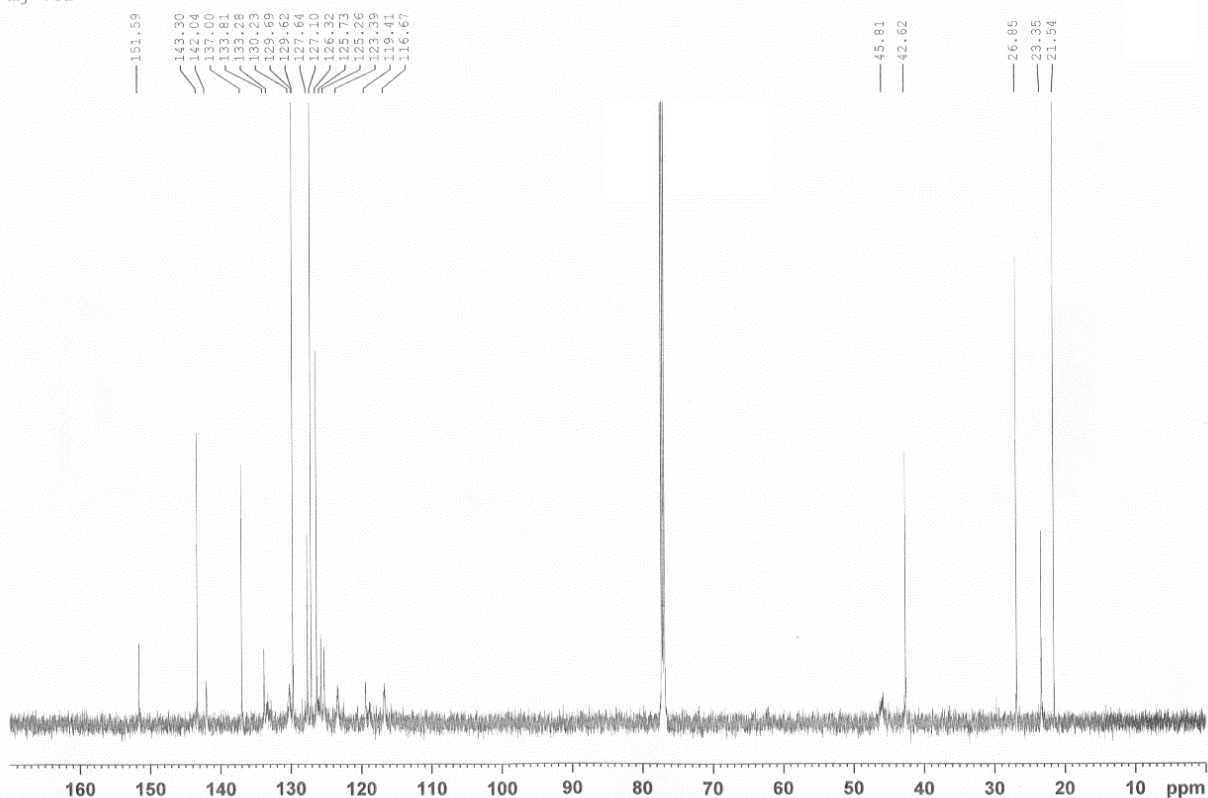

#### Acquisition Parameter

|             |            |                      |          |                  |           |
|-------------|------------|----------------------|----------|------------------|-----------|
| Source Type | ESI        | Ion Polarity         | Positive | Set Nebulizer    | 0.3 Bar   |
| Focus       | Not active | Set Capillary        | 4000 V   | Set Dry Heater   | 200 °C    |
| Scan Begin  | 100 m/z    | Set End Plate Offset | -500 V   | Set Dry Gas      | 3.0 l/min |
| Scan End    | 1000 m/z   | Set Charging Voltage | 2000 V   | Set Divert Valve | Source    |
|             |            | Set Corona           | 0 nA     | Set APCI Heater  | 0 °C      |

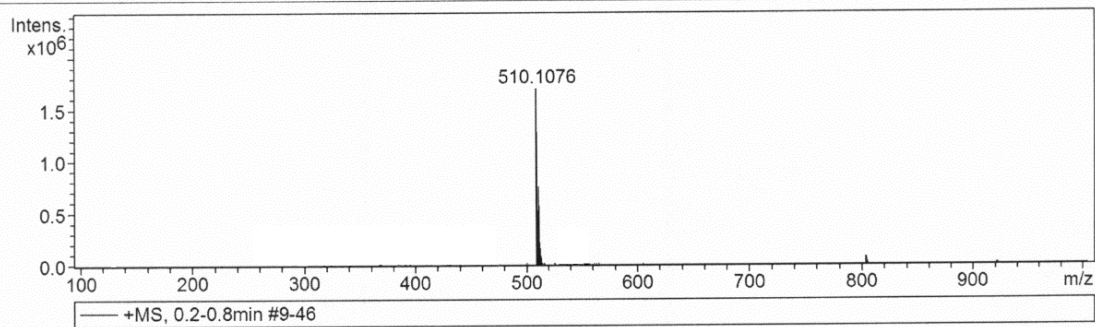

| # | m/z      | Res.  | S/N     | I       | I %   | FWHM   |
|---|----------|-------|---------|---------|-------|--------|
| 1 | 510.1076 | 13939 | 14844.9 | 1708201 | 100.0 | 0.0366 |
| 2 | 512.1048 | 13680 | 6597.7  | 761488  | 44.6  | 0.0374 |

22. NMR spectra and HR MS of 8-chloro-6-((1-phenyl-1*H*-1,2,3-triazol-4-yl)methyl)-quino[3,2-*b*]benzo[1,4]thiazine (**27**).

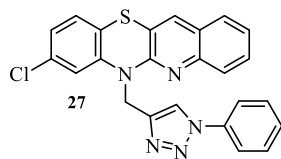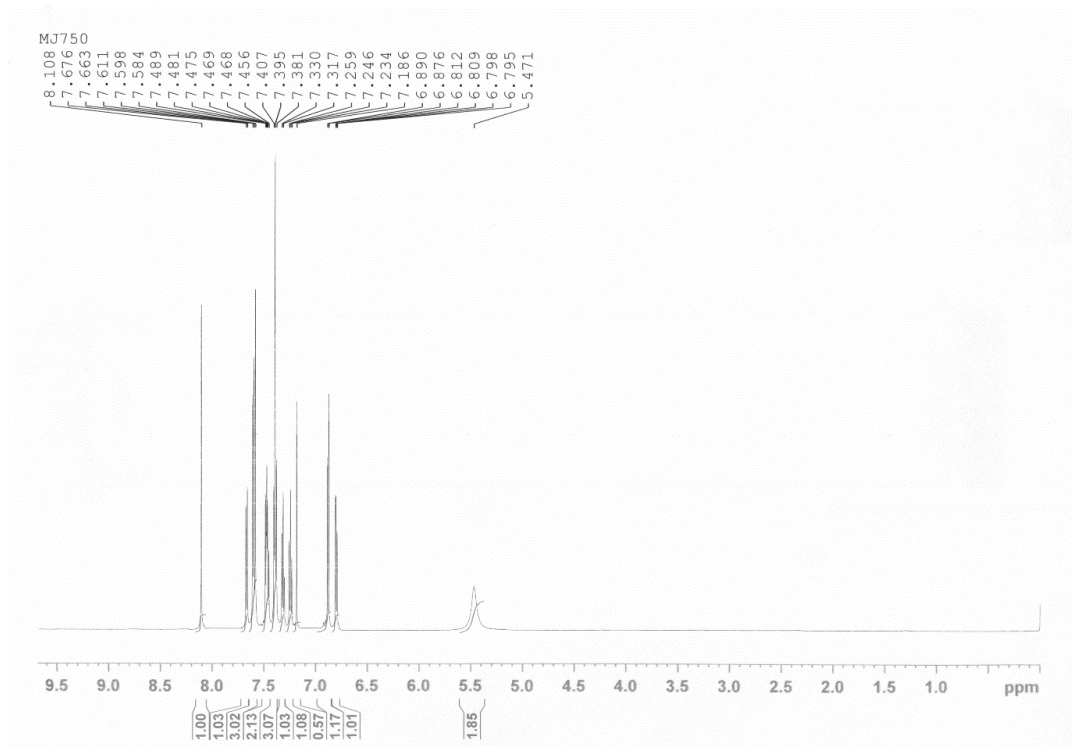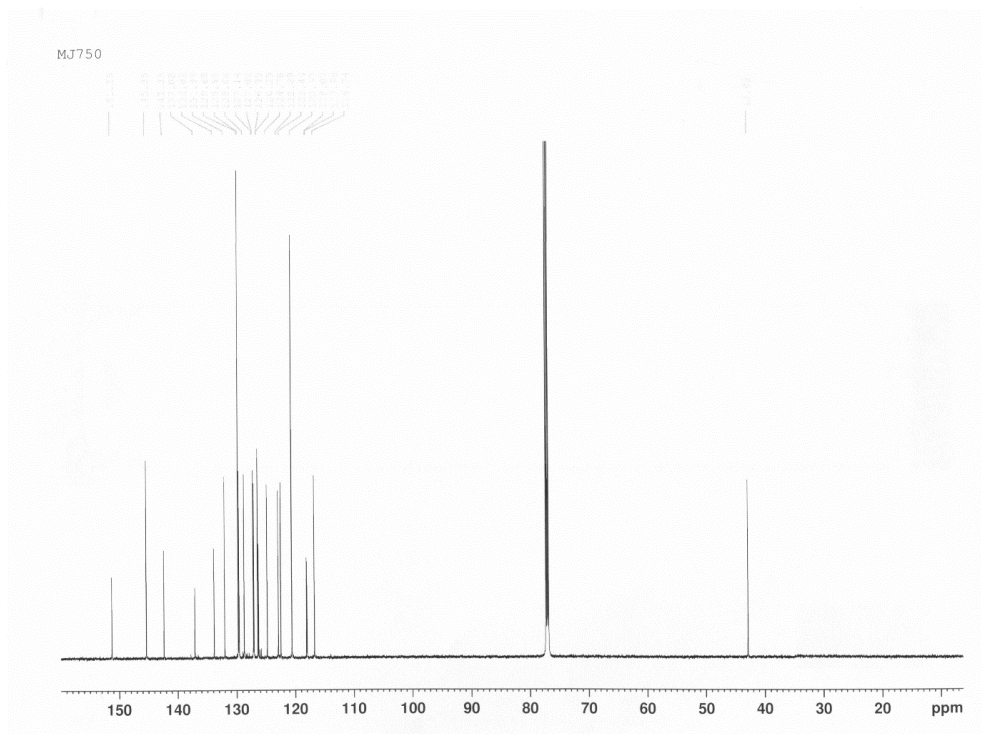

**Acquisition Parameter**

|             |          |                      |          |                  |           |
|-------------|----------|----------------------|----------|------------------|-----------|
| Source Type | ESI      | Ion Polarity         | Positive | Set Nebulizer    | 0.3 Bar   |
| Focus       | Active   | Set Capillary        | 4000 V   | Set Dry Heater   | 240 °C    |
| Scan Begin  | 100 m/z  | Set End Plate Offset | -500 V   | Set Dry Gas      | 4.0 l/min |
| Scan End    | 1000 m/z | Set Charging Voltage | 2000 V   | Set Divert Valve | Source    |
|             |          | Set Corona           | 0 nA     | Set APCI Heater  | 0 °C      |

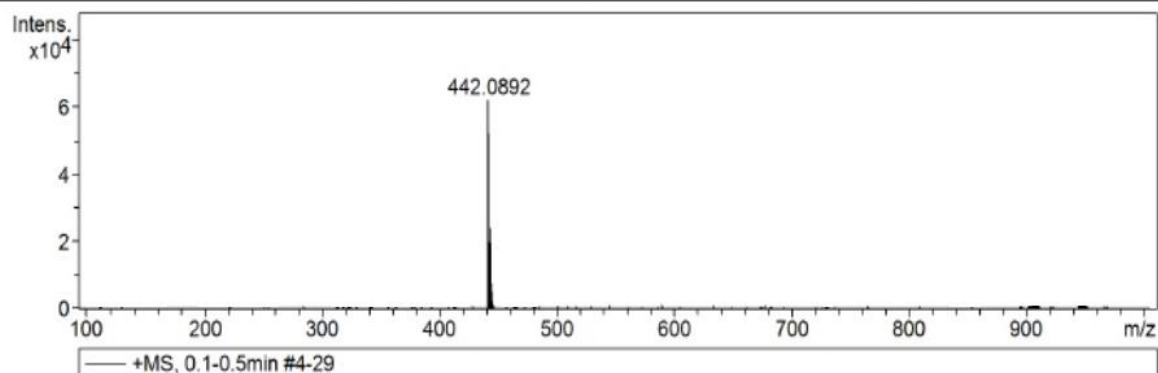

| # | m/z      | Res.  | S/N    | I     | I %   | FWHM   |
|---|----------|-------|--------|-------|-------|--------|
| 1 | 442.0892 | 22688 | 4657.9 | 61769 | 100.0 | 0.0195 |
| 2 | 444.0868 | 21031 | 1818.3 | 24166 | 39.1  | 0.0211 |

23. NMR spectra and HR MS of 8-chloro-6-((1-(4-(trifluoromethyl)phenyl)-1*H*-1,2,3-triazol-4-yl)methyl)-quino[3,2-*b*]benzo[1,4]thiazine (**28**).

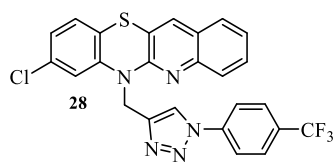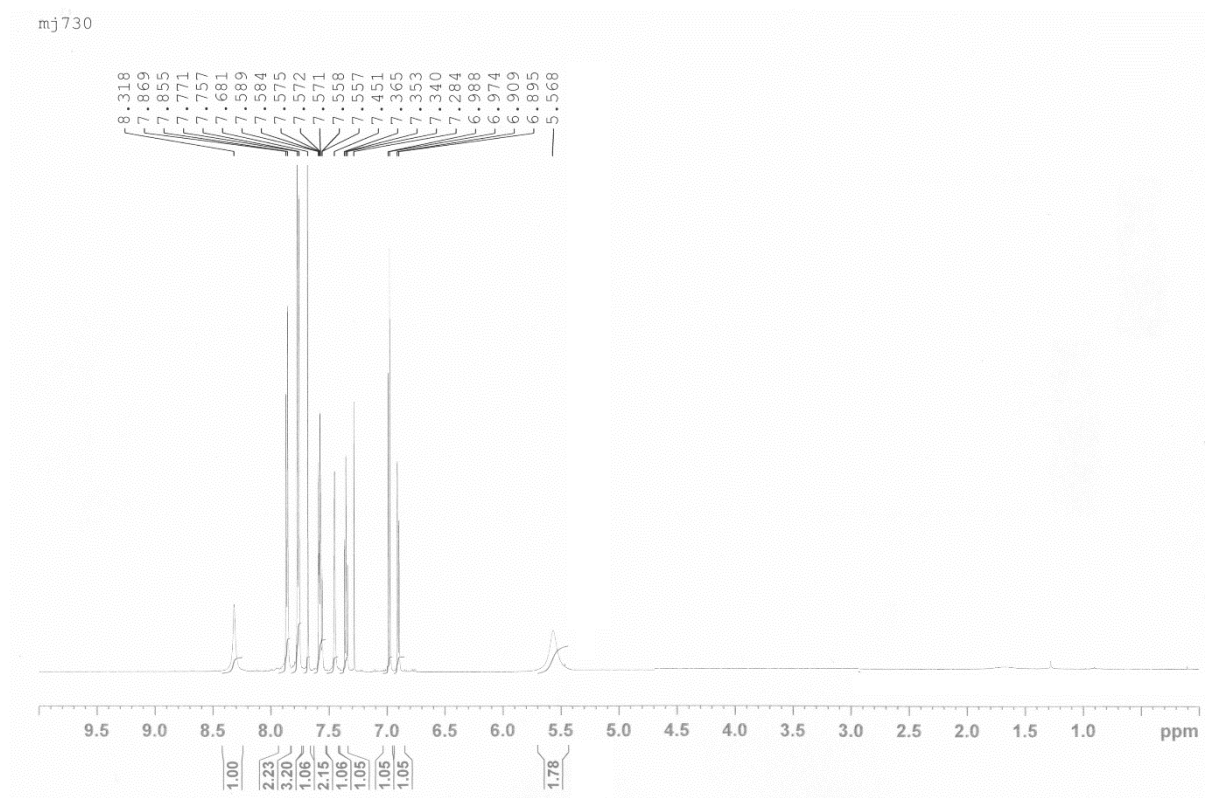

mj730 13c

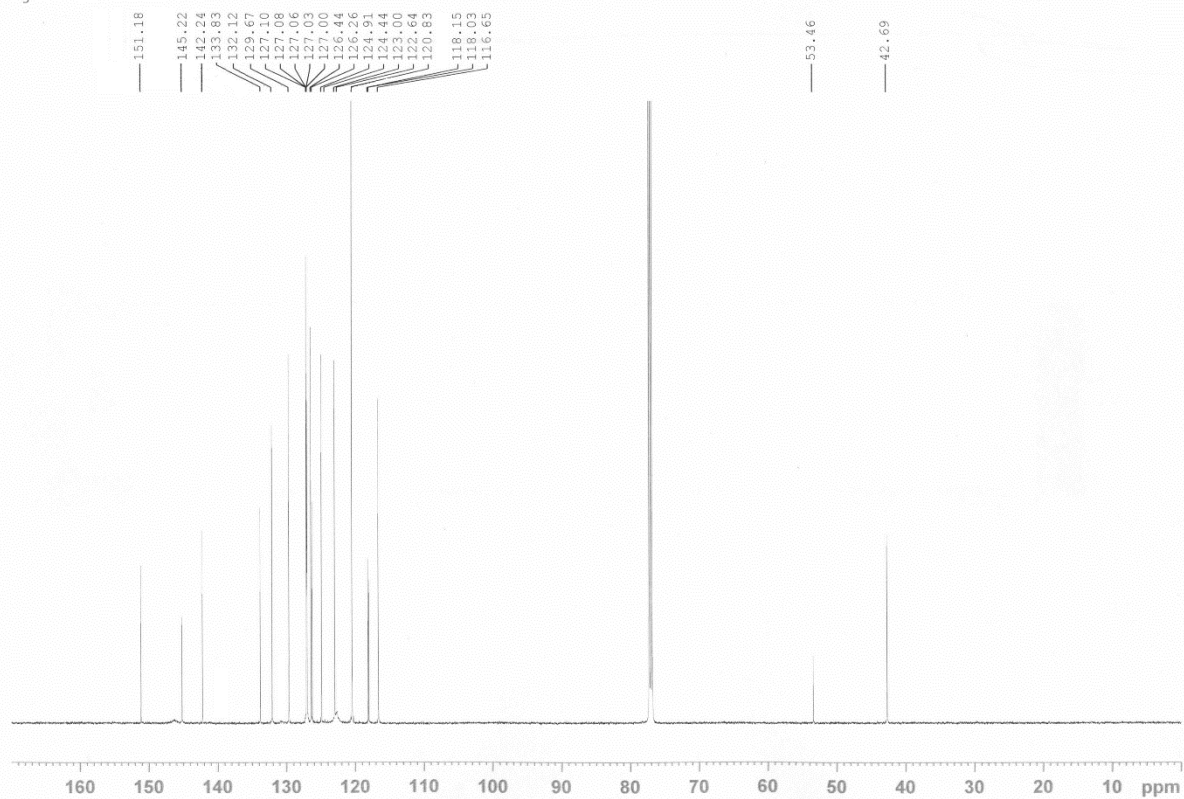

#### Acquisition Parameter

|             |          |                      |          |                  |           |
|-------------|----------|----------------------|----------|------------------|-----------|
| Source Type | ESI      | Ion Polarity         | Positive | Set Nebulizer    | 0.3 Bar   |
| Focus       | Active   | Set Capillary        | 4000 V   | Set Dry Heater   | 240 °C    |
| Scan Begin  | 100 m/z  | Set End Plate Offset | -500 V   | Set Dry Gas      | 4.0 l/min |
| Scan End    | 1000 m/z | Set Charging Voltage | 2000 V   | Set Divert Valve | Source    |
|             |          | Set Corona           | 0 nA     | Set APCI Heater  | 0 °C      |

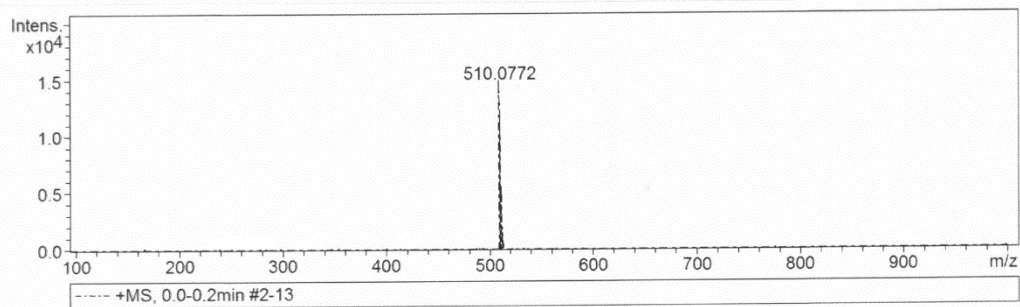

| # | m/z      | Res.  | S/N    | I     | I %   | FWHM   |
|---|----------|-------|--------|-------|-------|--------|
| 1 | 510.0772 | 22849 | 1149.1 | 14607 | 100.0 | 0.0223 |

24. NMR spectra and HR MS of 6-((1-benzyl-1*H*-1,2,3-triazol-4-yl)methyl)-8-chloroquino[3,2-*b*]benzo[1,4]thiazine (**29**).

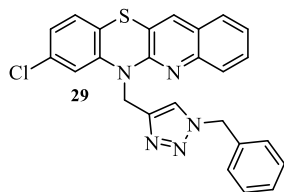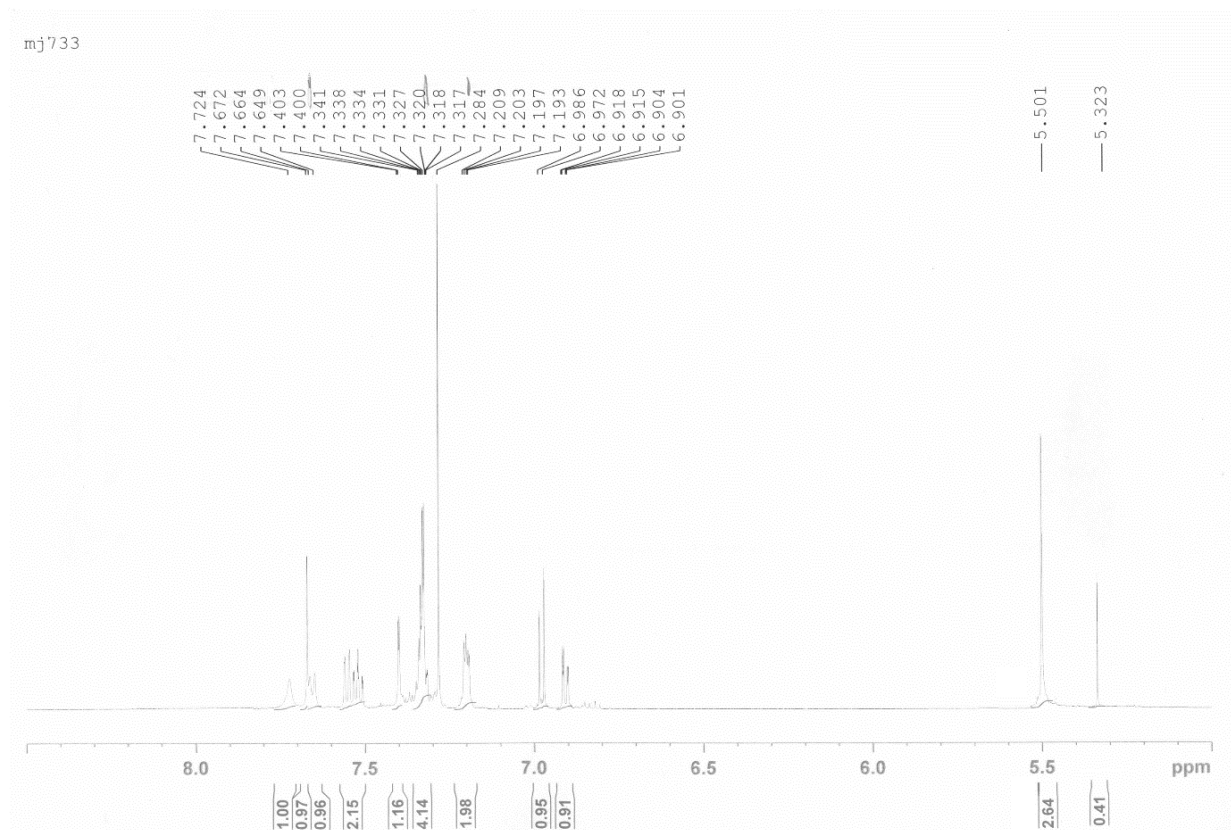



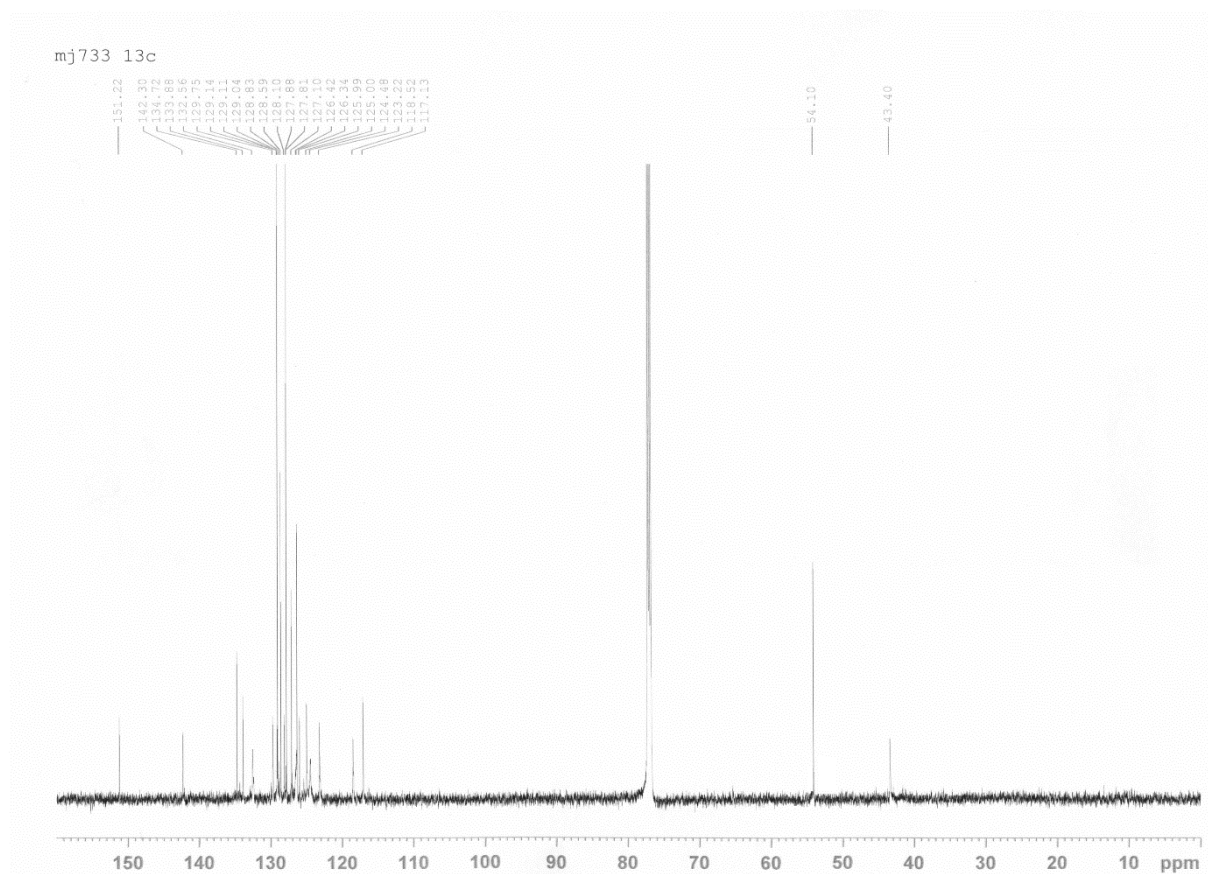

#### Acquisition Parameter

|             |          |                      |          |                  |           |
|-------------|----------|----------------------|----------|------------------|-----------|
| Source Type | ESI      | Ion Polarity         | Positive | Set Nebulizer    | 0.3 Bar   |
| Focus       | Active   | Set Capillary        | 4000 V   | Set Dry Heater   | 240 °C    |
| Scan Begin  | 100 m/z  | Set End Plate Offset | -500 V   | Set Dry Gas      | 4.0 l/min |
| Scan End    | 1000 m/z | Set Charging Voltage | 2000 V   | Set Divert Valve | Source    |
|             |          | Set Corona           | 0 nA     | Set APCI Heater  | 0 °C      |

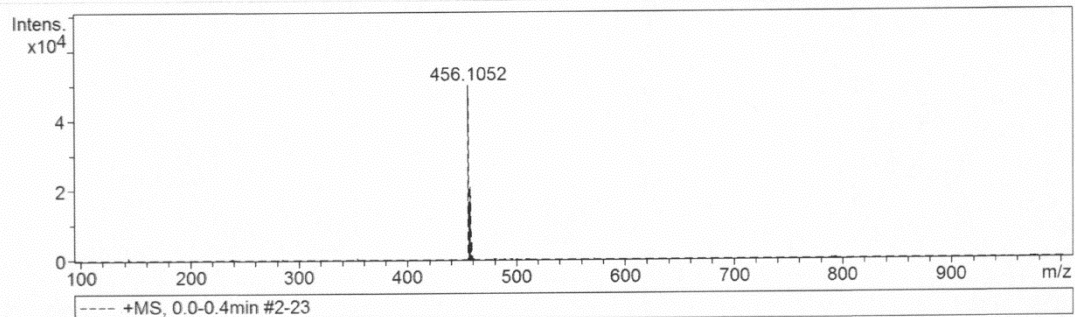

| # | m/z      | Res.  | S/N    | I     | I %   | FWHM   |
|---|----------|-------|--------|-------|-------|--------|
| 1 | 456.1052 | 22222 | 4335.4 | 49950 | 100.0 | 0.0205 |
| 2 | 458.1028 | 19880 | 1723.1 | 19866 | 39.8  | 0.0230 |

25. NMR spectra and HR MS of 8-chloro-6-((1-(4-fluorobenzyl)-1*H*-1,2,3-triazol-4-yl)methyl)-quino[3,2-*b*]benzo[1,4]thiazine (**30**).

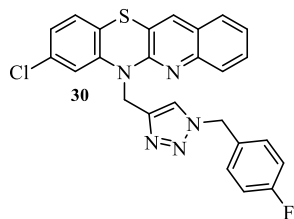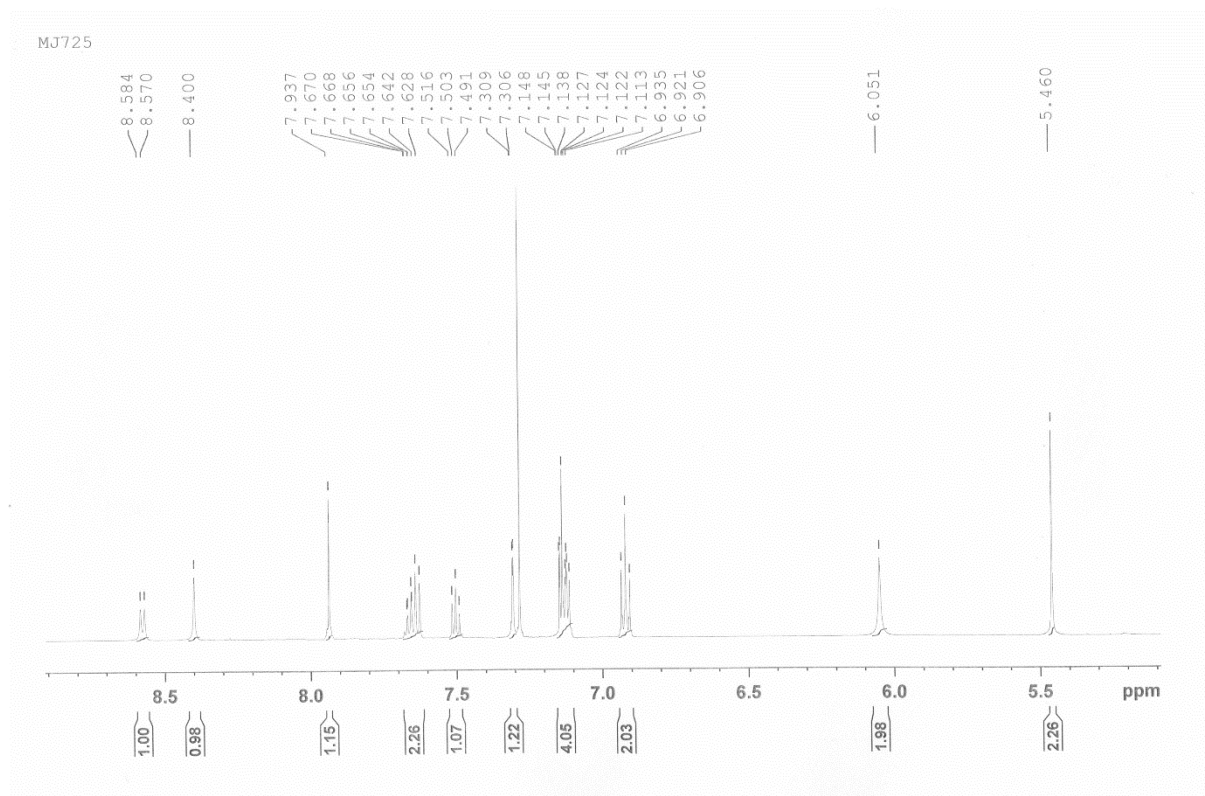

MJ725

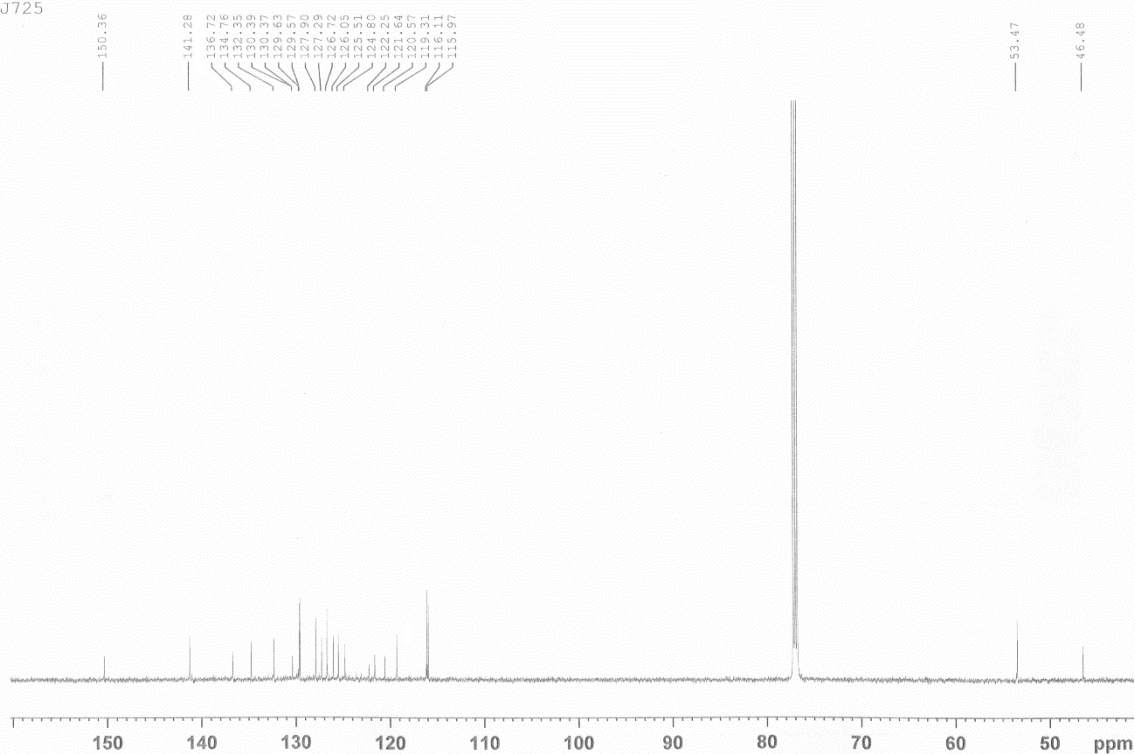

#### Acquisition Parameter

|             |          |                      |          |                  |           |
|-------------|----------|----------------------|----------|------------------|-----------|
| Source Type | ESI      | Ion Polarity         | Positive | Set Nebulizer    | 0.3 Bar   |
| Focus       | Active   | Set Capillary        | 4000 V   | Set Dry Heater   | 240 °C    |
| Scan Begin  | 100 m/z  | Set End Plate Offset | -500 V   | Set Dry Gas      | 4.0 l/min |
| Scan End    | 1000 m/z | Set Charging Voltage | 2000 V   | Set Divert Valve | Source    |
|             |          | Set Corona           | 0 nA     | Set APCI Heater  | 0 °C      |

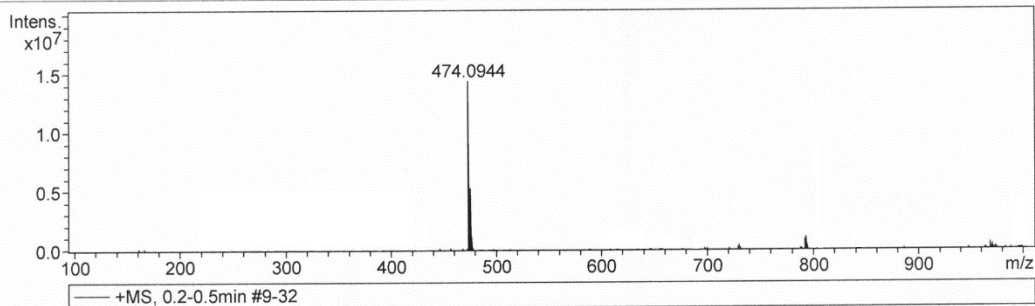

| # | m/z      | Res.  | S/N     | I        | I %   | FWHM   |
|---|----------|-------|---------|----------|-------|--------|
| 1 | 474.0944 | 48156 | 15401.2 | 14340540 | 100.0 | 0.0098 |
| 2 | 476.0916 | 46723 | 5583.8  | 5264247  | 36.7  | 0.0102 |

26. NMR spectra and HR MS of 8-chloro-6-(((1-(4-chlorobenzyl)-1H-1,2,3-triazol-4-yl)methyl)-quino[3,2-b]benzo[1,4]thiazine (**31**).

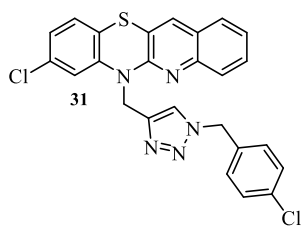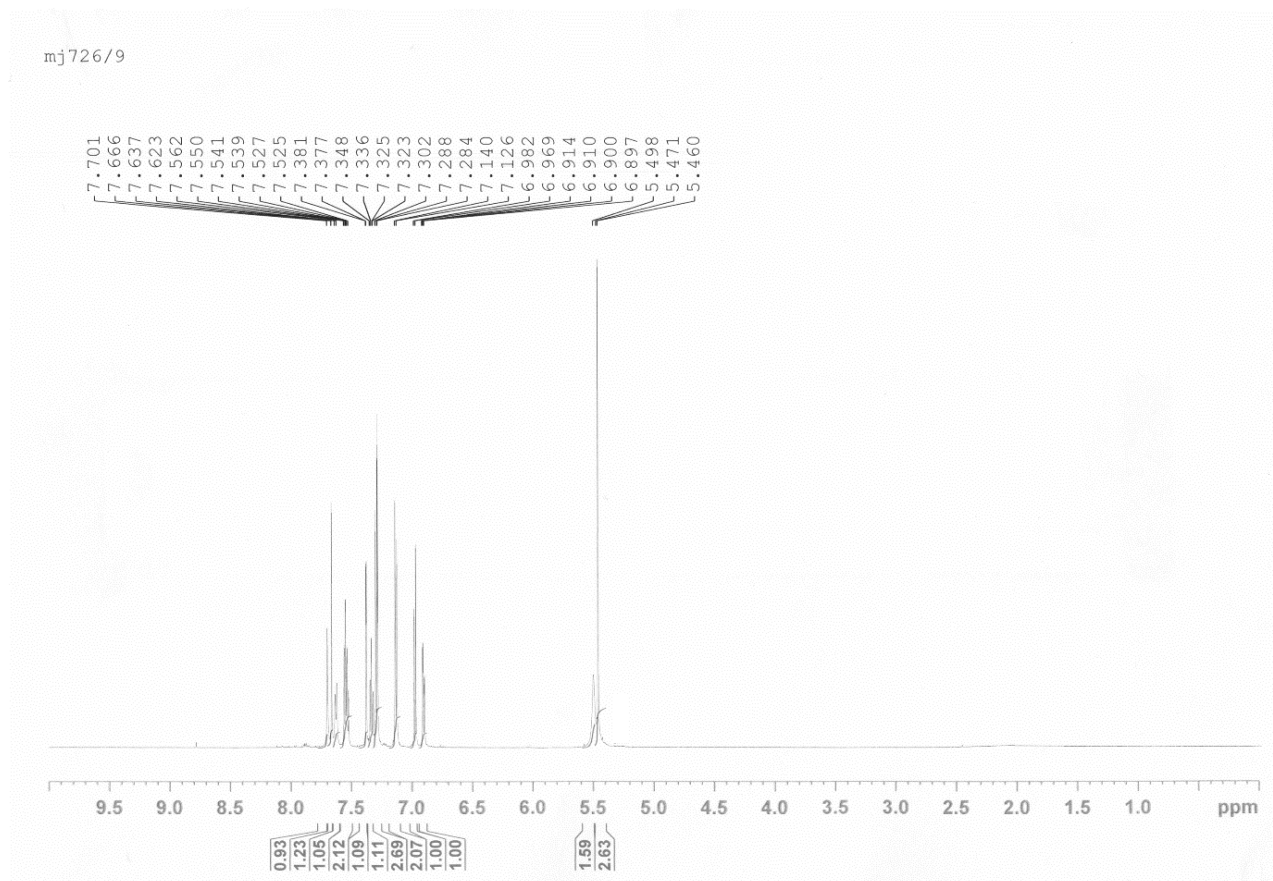

mj726/9

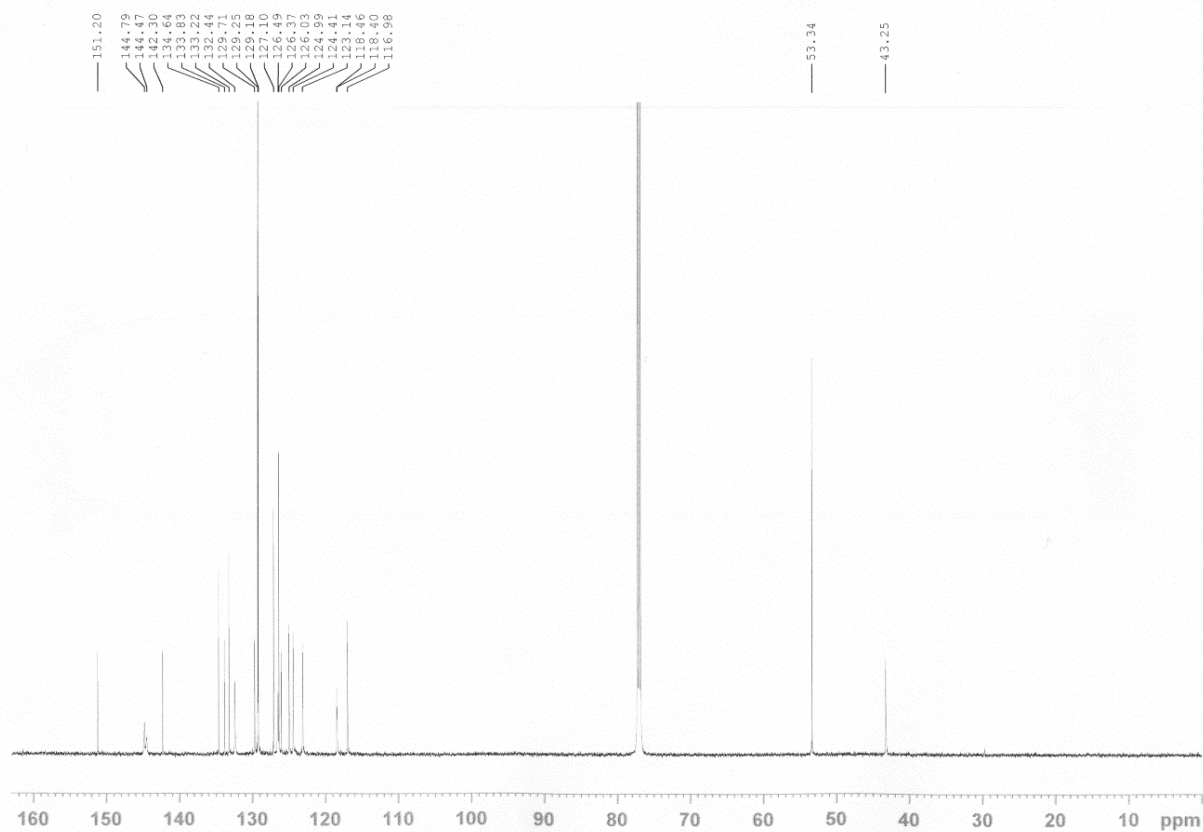

#### Acquisition Parameter

|             |          |                      |          |                  |           |
|-------------|----------|----------------------|----------|------------------|-----------|
| Source Type | ESI      | Ion Polarity         | Positive | Set Nebulizer    | 0.3 Bar   |
| Focus       | Active   | Set Capillary        | 4000 V   | Set Dry Heater   | 240 °C    |
| Scan Begin  | 100 m/z  | Set End Plate Offset | -500 V   | Set Dry Gas      | 4.0 l/min |
| Scan End    | 1000 m/z | Set Charging Voltage | 2000 V   | Set Divert Valve | Source    |
|             |          | Set Corona           | 0 nA     | Set APCI Heater  | 0 °C      |

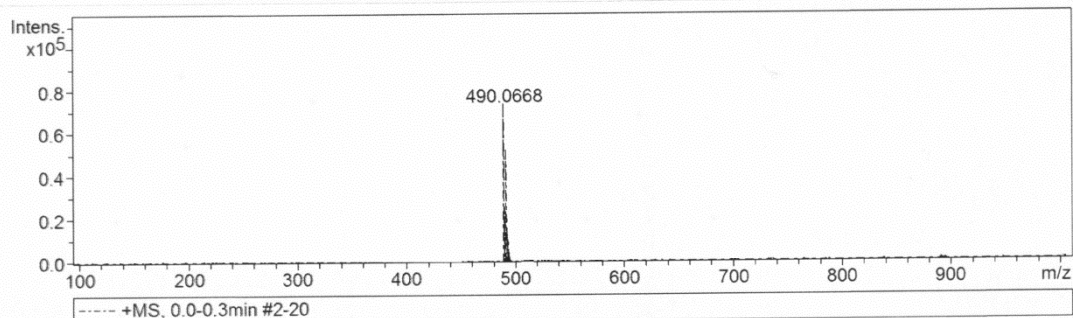

| # | m/z      | Res.  | S/N    | I     | I %   | FWHM   |
|---|----------|-------|--------|-------|-------|--------|
| 1 | 490.0668 | 22910 | 1750.7 | 71717 | 100.0 | 0.0214 |
| 2 | 492.0641 | 20719 | 1225.1 | 50371 | 70.2  | 0.0237 |

27. NMR spectra and HR MS of 4-((4-((8-chloroquino[3,2-b]benzo[1,4]thiazin-6-yl)methyl)-1*H*-1,2,3-triazol-1-yl)methyl)benzonitrile (**32**).

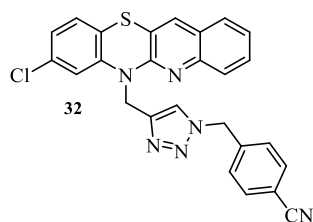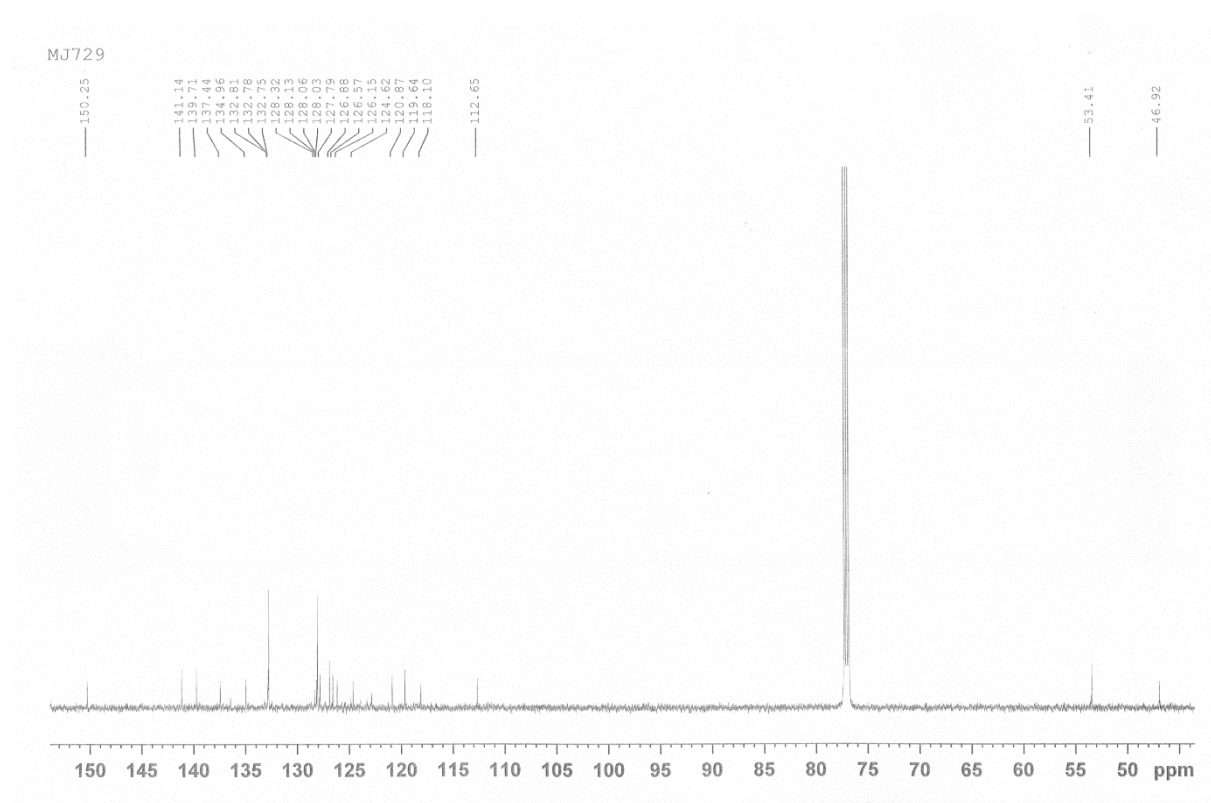

28. NMR spectra and HR MS of 8-chloro-6-((1-((phenylthio)methyl)-1*H*-1,2,3-triazol-4-yl)methyl)-quino[3,2-*b*]benzo[1,4]thiazine (**33**).

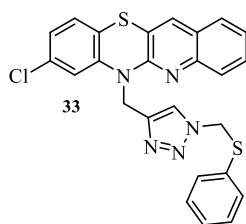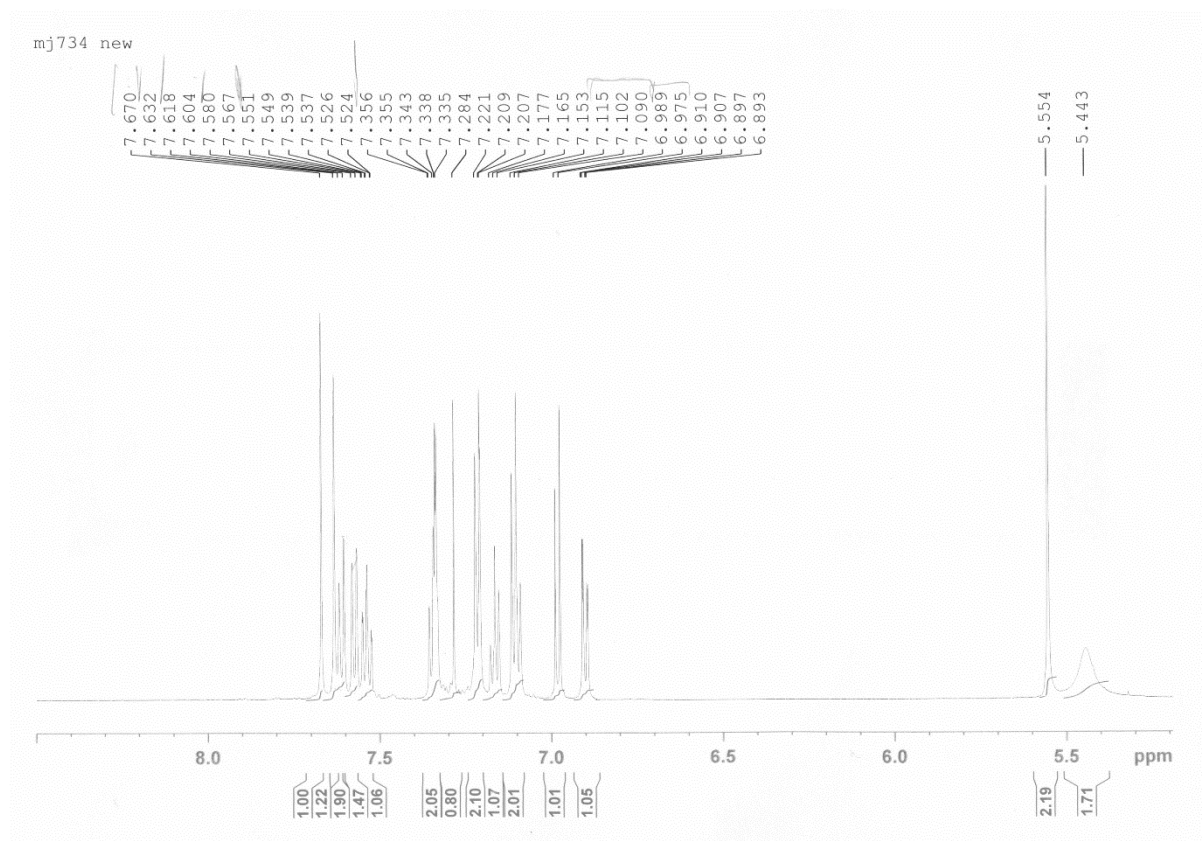



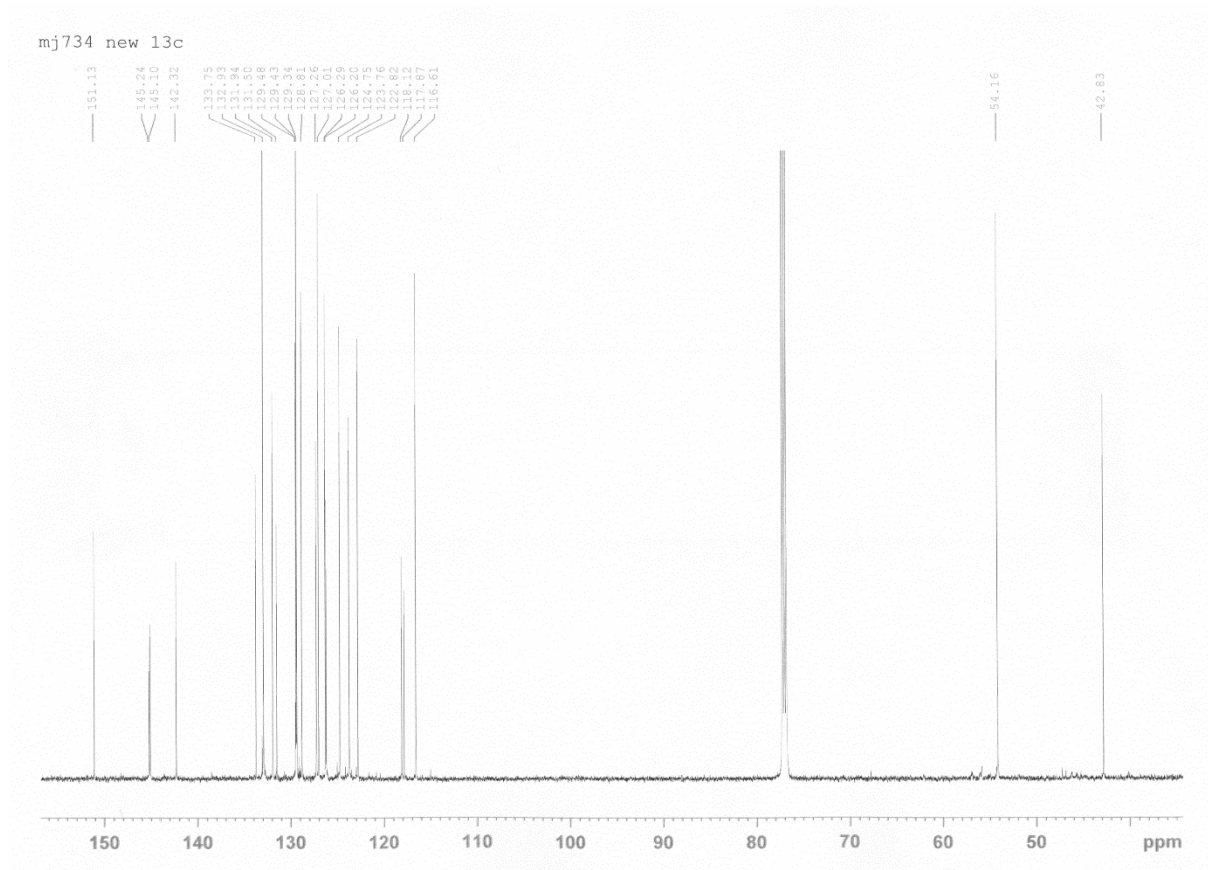

#### Acquisition Parameter

|             |          |                      |          |                  |           |
|-------------|----------|----------------------|----------|------------------|-----------|
| Source Type | ESI      | Ion Polarity         | Positive | Set Nebulizer    | 0.3 Bar   |
| Focus       | Active   | Set Capillary        | 4000 V   | Set Dry Heater   | 240 °C    |
| Scan Begin  | 100 m/z  | Set End Plate Offset | -500 V   | Set Dry Gas      | 4.0 l/min |
| Scan End    | 1000 m/z | Set Charging Voltage | 2000 V   | Set Divert Valve | Source    |
|             |          | Set Corona           | 0 nA     | Set APCI Heater  | 0 °C      |

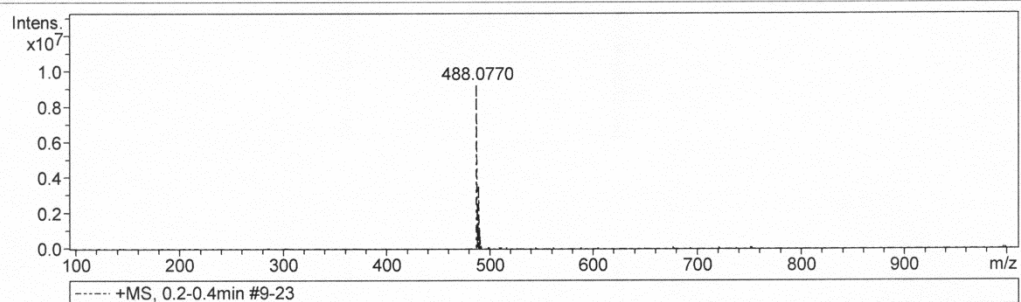

| # | m/z      | Res.  | S/N     | I       | I %   | FWHM   |
|---|----------|-------|---------|---------|-------|--------|
| 1 | 488.0770 | 48345 | 16381.6 | 9268264 | 100.0 | 0.0101 |
| 2 | 490.0740 | 43308 | 6352.0  | 3594898 | 38.8  | 0.0113 |
